# Supplementary material for: SMRT and Illumina RNA-Seq Identifies Potential Candidate Genes Related to the Double Flower Phenotype and Unveils SsAP2 as a Key Regulator of the Double-Flower Trait in Sagittaria sagittifolia
Source: MDPI journal article supplement (doi:10.3390/ijms23042240), 2022-02-17
Supplement: s1 [file s1]

Supplementary Table 2-1. RNA-Seq statistical of sample sequencing data evaluation  
of *Sagittaria sagittifolia*

| Samples | Read Number | Base Number    | GC Content | %≥Q30 |
|---------|-------------|----------------|------------|-------|
| SC2-1   | 31,529,264  | 9,429,799,036  | 53.14      | 94.32 |
| SC2-2   | 22,284,298  | 6,651,291,022  | 53.48      | 94.24 |
| SC2-3   | 21,622,935  | 6,446,993,312  | 53.78      | 94.15 |
| SX2-1   | 24,017,219  | 7,182,145,440  | 53.15      | 94.67 |
| SX2-2   | 39,127,198  | 11,670,597,042 | 53.79      | 94.16 |
| SX2-3   | 22,242,407  | 6,632,086,748  | 53.52      | 93.95 |
| DC3-1   | 23,544,845  | 7,021,875,568  | 53.36      | 94.34 |
| DC3-2   | 21,169,992  | 6,310,914,946  | 53.19      | 94.23 |
| DC3-3   | 26,127,702  | 7,796,294,954  | 53.40      | 94.82 |
| DC2-1   | 23,127,300  | 6,912,360,434  | 52.32      | 94.39 |
| DC2-2   | 21,620,720  | 6,457,177,220  | 52.39      | 94.79 |
| DC2-3   | 22,231,989  | 6,634,423,992  | 52.99      | 94.53 |
| DC1-1   | 20,125,975  | 6,009,580,162  | 52.68      | 94.46 |
| DC1-2   | 19,648,755  | 5,878,892,078  | 52.45      | 94.04 |
| DC1-3   | 24,508,029  | 7,326,406,122  | 52.87      | 94.58 |
| SC3-1   | 20,628,133  | 6,154,150,226  | 53.29      | 94.48 |
| SC3-2   | 23,152,671  | 6,879,804,752  | 53.27      | 93.97 |
| SC3-3   | 25,581,597  | 7,622,873,756  | 53.64      | 94.48 |
| SX3-1   | 21,867,569  | 6,533,215,600  | 53.93      | 94.92 |

|       |            |               |       |       |
|-------|------------|---------------|-------|-------|
| SX3-2 | 25,198,833 | 7,492,023,170 | 53.83 | 94.21 |
| SX3-3 | 27,311,783 | 8,139,566,390 | 53.69 | 94.54 |
| SC1-1 | 22,131,161 | 6,590,590,316 | 52.04 | 94.84 |
| SC1-2 | 22,849,152 | 6,816,839,492 | 52.17 | 94.61 |
| SX1-1 | 22,002,282 | 6,573,979,094 | 52.29 | 94.39 |
| SX1-2 | 22,775,623 | 6,801,539,948 | 52.56 | 94.65 |
| DX3-1 | 19,897,979 | 5,951,012,156 | 52.45 | 95.27 |
| DX3-2 | 29,174,702 | 8,696,540,448 | 53.41 | 94.63 |
| DX3-3 | 21,329,167 | 6,353,392,404 | 53.36 | 94.39 |
| DX2-1 | 24,057,177 | 7,191,361,348 | 52.56 | 94.90 |
| DX2-2 | 24,175,413 | 7,216,120,786 | 53.27 | 94.35 |
| DX2-3 | 20,835,011 | 6,208,674,078 | 52.88 | 95.13 |
| DX1-1 | 19,823,039 | 5,923,366,726 | 52.48 | 94.30 |
| DX1-2 | 21,756,889 | 6,502,916,340 | 52.66 | 94.50 |
| DX1-3 | 21,815,010 | 6,518,364,440 | 51.82 | 94.97 |

note: Samples: Sample information list Sample name;

Read Number: Clean Data in total number of pair-end Reads;

Base Number: Clean Data in total base number;

GC Content: Clean Data GC Content, Clean Data G and C in percentage of the total base;

%≥Q30: Clean Data with the percentage of a base with mass values greater than or equal to 30.

Supplementary Table2- 1 Categorize information of transcripts in *Sagittaria sagittifolia* from SMRT data

| Classify                         | Numbers       |
|----------------------------------|---------------|
| Number of ccs                    | 656,275       |
| Read Bases of CCS                | 1,466,214,311 |
| Mean Read Length of CCS          | 2,234         |
| Number of undesired primer reads | 50,432        |
| Number of filtered short reads   | 57            |

---

|                                              |         |
|----------------------------------------------|---------|
| Number of full-length non-chimeric reads     | 579,295 |
| Number of consensus isoforms                 | 156,338 |
| Average consensus isoforms read length       | 2,208   |
| Number of polished high-quality isoforms     | 153,620 |
| Number of polished low-quality isoforms      | 2,315   |
| Percent of polished high-quality isoforms(%) | 98.26%  |

---

Supplementary Table 2- 3 Statistics of transcripts noted

| <b>Annotated<br/>databases</b> | <b>Isoform Number</b> |
|--------------------------------|-----------------------|
| COG                            | 24,381                |
| GO                             | 42,556                |
| KEGG                           | 25,831                |
| KOG                            | 38,191                |
| Pfam                           | 47,759                |
| Swiss-Prot                     | 43,854                |
| eggNOG                         | 58,350                |
| nr                             | 59,388                |
| All                            | 59,789                |
