# Supplementary material for: SMRT and Illumina RNA-Seq Identifies Potential Candidate Genes Related to the Double Flower Phenotype and Unveils SsAP2 as a Key Regulator of the Double-Flower Trait in Sagittaria sagittifolia
Source: MDPI journal article supplement (doi:10.3390/ijms23042240), 2022-02-17
Supplement: s1 [file s1]

Table 1 genes Primer of *Sagittaria sagittifolia*

|                |                                           |
|----------------|-------------------------------------------|
| 14296 (AP2)    |                                           |
| 14926F         | 5' AAACCGCAATAGCGACCG 3'                  |
| 14926R         | 5' GGCTGCCAGAACCAATACCTC 3'               |
| 12921R         | 5' TGCCAGAACCAATACCTCCA 3'                |
| 42875 (AP3)    |                                           |
| 42875F         | 5' AGACAGAAGCACATCCCCACC 3'               |
| 42875R         | 5' CGATCTTGCCACGACCCAT 3'                 |
| 42092 (AG)     |                                           |
| 42092F         | 5' ACCTTAACCAACCCCTCCACT 3'               |
| 42092R         | 5' CCGTTCAACGATCCTCTGC 3'                 |
| 49250 (SEP)    |                                           |
| 49250F         | 5' AGACAGAAAAGAGTTGGATGCG 3'              |
| 49250R         | 5' CGAGGGGTAAGTGAGATAGGCT 3'              |
| 48048 (PI)     |                                           |
| 48048F         | 5' CCCTCACCACCACTCCTTTC 3'                |
| 48048R         | 5' CAATCTCCCAGCAGCGTCA 3'                 |
| 140412 (WUS)   |                                           |
| 140412F        | 5' ATCTTGGATTATGCCTGTGCC 3'               |
| 1404R          | 5' CATCATGGACGTTTGAAGTACC 3'              |
| <i>SsAP2-F</i> | 5' TCTAGAATGCAGCAGTGAGGCCGGAGGTCAGG3'     |
| <i>SsAP2-R</i> | 5' TCTAGAATGCAGCAGTGAGGCCGGAGGTCAGGACAC3' |
