# Supplementary material for: SMRT and Illumina RNA-Seq Identifies Potential Candidate Genes Related to the Double Flower Phenotype and Unveils SsAP2 as a Key Regulator of the Double-Flower Trait in Sagittaria sagittifolia
Source: MDPI journal article supplement (doi:10.3390/ijms23042240), 2022-02-17
Supplement: s1 [file s1]

A) CDS sequence alignments for *Cg1351933* and *Cg123722*

```

      10      20      30      40      50      60
Cg1351933  ....|....| ....|....| ....|....| ....|....| ....|....|
Cg123722  ATGATGCTGG ATCTCACCTT GCGTCGTCC CCTGACGACA CGTACAAGGG CAGCGTGGAA 60
Clustal Co *****
      70      80      90     100     110     120
Cg1351933  ....|....| ....|....| ....|....| ....|....| ....|....|
Cg123722  GCCTCCGTGA ACGAGTCCGG AACGTCCAAG TCCTCCGTCC TCAACGGAGA CGGCTCCAGC 120
Clustal Co *****
     130     140     150     160     170     180
Cg1351933  ....|....| ....|....| ....|....| ....|....| ....|....|
Cg123722  AACGACGATT CATGCTCCAA CCGCGTTGCC GCGGCGGGGT TCCGCTTCGG CATCCTCAAG 180
Clustal Co ***** *
     190     200     210     220     230     240
Cg1351933  ....|....| ....|....| ....|....| ....|....| ....|....|
Cg123722  GACGGGGACG ACGAAGATGA CGACTTGGTT GAGCAGGAGG TGCCCAACGA CGACGATGGT 240
Clustal Co *****
     250     260     270     280     290     300
Cg1351933  ....|....| ....|....| ....|....| ....|....| ....|....|
Cg123722  GTTGACGATG ACGGGGCGTT TGGCCGATG GGGGGCCTCG CCACCAAGGA CTTGTTCCCG 300
Clustal Co *****
     310     320     330     340     350     360
Cg1351933  ....|....| ....|....| ....|....| ....|....| ....|....|
Cg123722  CCACCTATGA TGGCCTGCGT GGAAGGCACC CTGGGAGCGA ACGCTGCGGG TATACGGGCT 360
Clustal Co *****
     370     380     390     400     410     420
Cg1351933  ....|....| ....|....| ....|....| ....|....| ....|....|
Cg123722  GTTCCCTTCG TTCCTGTGGG ATCTTCGTCG TCCTCTGCTG CCTGCAGGCC GCAGTTGGTG 420
Clustal Co *****
     430     440     450     460     470     480
Cg1351933  ....|....| ....|....| ....|....| ....|....| ....|....|
Cg123722  GATCTGAGTT TCTGCCGAGG GGATGCAGCA GTGAGGCCGG AGGTCAGGAC ACTCCCTCAG 480
Clustal Co *****
     490     500     510     520     530     540
Cg1351933  ....|....| ....|....| ....|....| ....|....| ....|....|
Cg123722  CAGCCGCCGC CGCCACCGCC GCAGCAGCAG CAGCCGCAAC AACAGGTGAA GAAGAGCCGG 540
Clustal Co *****
     550     560     570     580     590     600
Cg1351933  ....|....| ....|....| ....|....| ....|....| ....|....|
Cg123722  CGTGGCCCAC GGTCCCGAAG CTCGCAGTAC CGTGGCGTCA CGTTCTACCG TAGGACTGGA 600
Clustal Co *****
     610     620     630     640     650     660
Cg1351933  ....|....| ....|....| ....|....| ....|....| ....|....|
Cg123722  AGATGGGAAT CCCACATTTG GGAAGGTGGA AAGCAGATCT ATCTAGGTGG CTTTGACACT 660
Clustal Co *****
     670     680     690     700     710     720
Cg1351933  ....|....| ....|....| ....|....| ....|....| ....|....|
Cg123722  GCTCATGCCG CAGCAAGGGC ATATGACCGG GCTGCTATAA AATTTAGGGG AATAGATGCA 720
Clustal Co *****

```

```

              730      740      750      760      770      780
Cg135193      ....|....| ....|....| ....|....| ....|....| ....|....|
GACATAAAATT TCAACCTCAG TGA CTACGAT GATGATATGA AACTGATGAG CAATCTCTCC 780
Cg123722      GACATAAAATT TCAACCTCAG TGA CTACGAT GATGATATGA AACTGATGAG CAATCTCTCC 780
Clustal Co      *****
              790      800      810      820      830      840
Cg135193      ....|....| ....|....| ....|....| ....|....| ....|....|
AAGGAGGAAT TCGTTCACAT ATTGCGTCGC CAAAGTACAG GATTTTCAAG AGGAAGTTCA 840
Cg123722      AAGGAGGAAT TCGTTCACAT ATTGCGTCGC CAAAGTACAG GATTTTCAAG AGGAAGTTCA 840
Clustal Co      *****
              850      860      870      880      890      900
Cg135193      ....|....| ....|....| ....|....| ....|....| ....|....|
AAATACAGAG GGGTGACGTT GCACAAGTGT GGTCGCTGGG AAGCTCGCAT GGGGCAGTTC 900
Cg123722      AAATACAGAG GGGTGACGTT GCACAAGTGT GGTCGCTGGG AAGCTCGCAT GGGGCAGTTC 900
Clustal Co      *****
              910      920      930      940      950      960
Cg135193      ....|....| ....|....| ....|....| ....|....| ....|....|
CTGGGAAAGA AGTATATATA TCTTGGATTG TTCGACAGTG AAGTAGAGGC TGCAAGGGCT 960
Cg123722      CTGGGAAAGA AGTATATATA TCTTGGATTG TGTGACAGTG AAGTAGAGGC TGCAAGGGCT 960
Clustal Co      *****
              970      980      990      1000      1010      1020
Cg135193      ....|....| ....|....| ....|....| ....|....| ....|....|
TATGACAAGG CAGCTATCCG ATGTAATGGG AGGGAGGCTG TCACAAATTT CGACCTGAGT 1020
Cg123722      TATGACAAGG CAGCTATCCG ATGTAATGGG AGGGAGGCTG TCACAAATTT CGACCTGAGT 1020
Clustal Co      *****
              1030      1040      1050      1060      1070      1080
Cg135193      ....|....| ....|....| ....|....| ....|....| ....|....|
ACTTACGAAG GGGAGCTTAT CTCGGAAGCA GACACTGAGG GCCATAACCT TGACTTGAGT 1080
Cg123722      ACTTACGAAG GGGAGCTTAT CTCGGAAGCA GACACTGAGG GCCATAACCT TGACTTGAGT 1080
Clustal Co      *****
              1090      1100      1110      1120      1130      1140
Cg135193      ....|....| ....|....| ....|....| ....|....| ....|....|
CTAAGTATTT CCCAGCCTGC CAGTGACAGT CCCAAGGGGG ATAAGACCCC GAATACTGTT 1140
Cg123722      CTAAGTATTT CCCAGCCTGC CAGTGACAGT CCCAAGGGGG ATAA----- 1124
Clustal Co      *****
              1150      1160      1170      1180      1190      1200
Cg135193      ....|....| ....|....| ....|....| ....|....| ....|....|
CTGATCCAGT CCCTTTCATT TGACTCGCCA GAGGTTAAGA AGTCTCGGAT CGATTTTCCT 1200
Cg123722      -----
Clustal Co      -----
              1210      1220      1230      1240      1250      1260
Cg135193      ....|....| ....|....| ....|....| ....|....| ....|....|
TCGTCCTTTT CCATCAGCCA GACATGCAGA CCAGCTGAAG GACGACACGG GCTTCCCATG 1260
Cg123722      -----
Clustal Co      -----
              1270      1280      1290      1300      1310      1320
Cg135193      ....|....| ....|....| ....|....| ....|....| ....|....|
TGGGTGACTC AGGCCAATTG TTTTCCAAGC TTTGAGGGGA GCGCACTTGA CAAGAGGCCA 1320
Cg123722      -----
Clustal Co      -----
              1330      1340      1350      1360      1370      1380
Cg135193      ....|....| ....|....| ....|....| ....|....| ....|....|
GAGACGAAAC CGATTGCTCT TCCAAGTTTG TCATGGCAAG TGCATGCTGC TGGTCTTACC 1380
Cg123722      -----
Clustal Co      -----
              1390      1400      1410      1420      1430      1440
Cg135193      ....|....| ....|....| ....|....| ....|....| ....|....|
TCACTGCCAT CCTCTGCAGC ATCATCAGGA TTCTCTGCAA CCGCAATGCC TGCTGCAGTC 1440
Cg123722      -----
Clustal Co      -----

```

```

          1450      1460      1470      1480      1490      1500
Cg135193  ....|....| ....|....| ....|....| ....|....| ....|....|
Cg123722  CCAGCCTTCC CTTCTGCTCC TTCACACAAA AGACAACCTGA TTCAATCAAA CGACAAGCCA 1500
Clustal Co  ----- 1114

          1510      1520      1530      1540      1550      1560
Cg135193  ....|....| ....|....| ....|....| ....|....| ....|....|
Cg123722  TCTGCCCCCA TCAATATCCA GTTCAATTCT TCAGGCGAGG CATAACAAGAG GAAGGGTCAG 1560
Clustal Co  ----- 1114

          1570
Cg135193  ....|....| ..
Cg123722  ----- -- 1124
Clustal Co  1114

```

#### miR172 binding site

Cg135193 1382 TCACTGCCAT CCTCTGCAGC ATCATCAGGA TTCTCTGCAA CCGCAATGCC TGCTGCAGTC 1440

#### B)

```

          10      20      30      40      50      60
Cg135193  MMLDLTLASS PDDTYKGSVE ASVNESGTSK SSVLNGDGSS NDDSCSNRVA AAGFRFGILK 60
Cg123722  MMLDLTLASS PDDTYKGSVE ASVNESGTSK SSVLNGDGSS NDESCSNRVA AAGFRFGILK 60
Clustal Co  *****

          70      80      90      100      110      120
Cg135193  DGDEDDDDLV EQEVPNDDDG VDDDGAFGRM GGLATKDLFP PPMACVEGT LGANAAGIRA 120
Cg123722  DGDEDDDDLV EQEVPNDDDG VDDDGAFGRM GGLATKDLFP PPMACVEGT LGANAAGIRA 120
Clustal Co  *****

          130      140      150      160      170      180
Cg135193  VPFVPVGSSS SSAACRPQLV DLSFCRRDAA VRPEVRTLPQ QPPPPPPQQQ QPQQQVKKSR 180
Cg123722  VPFVPVGSSS SSAACRPQLV DLSFCRRDAA VRPEVRTLPQ QPPPPPPQQQ -PQHQVKRSR 179
Clustal Co  *****

          190      200      210      220      230      240
Cg135193  RGPRSRSSQY RGVTFYRRTG RWESHIWDCG KQIYLGGFDT AHAAARAYDR AAIKFRGIDA 240
Cg123722  RGPRSRSSQY RGVTFYRRTG RWESHIWDCG KQIYLGGFDT AHAAARAYDR AAIKFRGIDA 239
Clustal Co  *****

          250      260      270      280      290      300
Cg135193  DINFNLSDYD DDMKLMSNLS KEEFVHILRR QSTGFSRGSS KYRGVTLHKC GRWEARMGQF 300
Cg123722  DINFNLSDYD DDMKLMSNLS KEEFVHILRR QSTGFSRGSS KYRGVTLHKC GRWEARMGQF 299
Clustal Co  *****

          310      320      330      340      350      360
Cg135193  LGKKYIYLGL FDSEVEAARA YDKAAIRCNG REAVTNFDLS TYEGELISEA DTEGHNLDLS 360
Cg123722  LGKKYIYLGL CDSEVEAARA YDKAAIRCNG REAVTNFDLS TYEGELISEA DTEGHNLDLS 359
Clustal Co  *****

          370      380      390      400      410      420

```

```

.....|.....| .....|.....| .....|.....| .....|.....| .....|.....|
Cg135193    LISIQPASDS PKGDKTPNTV LIQSLSFDSF EVKKSRIIDFP SSFSISQTCR PAEGRHGLPM 420
Cg123722    LISIQPASDS PKGD----- 373
Clustal Co  ***** 372

          430          440          450          460          470          480
.....|.....| .....|.....| .....|.....| .....|.....| .....|.....|
Cg135193    WVTQANCFPS FEQSALDKRP ETKPIALPSL SWQVHAAGPT SLPSSAASSG FSATAMPAAV 480
Cg123722    ----- 373
Clustal Co                                     372

          490          500          510          520
.....|.....| .....|.....| .....|.....| .....|.....| .....
Cg135193    PAFPSAPSHK RQLIQSNDKP SAPINIQFNS SGEAYKRKGQ NRG- 523
Cg123722    ----- 373
Clustal Co                                     372

```

## C)

```

Cg135193    MMMLDLTLASSPDDTYKGSVEASVNESGTSKSSVLNGDGSSNDDSCSNRVAAAGFRFGILK 60
Cg123722    MMMLDLTLASSPDDTYKGSVEASVNESGTSKSSVLNGDGSSNDESCSNRVAAAGFRFGILK 60

Cg135193    DGDEDEDDDLVEQEVPNDDDGVDGAFGRMGGLATKDLFPPPMACVEGTLGANAAGIRA 120
Cg123722    DGDEDEDDDLVEQEVPNDDDGVDGAFGRMGGLATKDLFPPPMACVEGTLGANAAGIRA 120

Cg135193    VPFVPVGSSSSSAACRPQLVDLSFCRRDAVRPEVRTLPQQPPPPPPQQQQPQQQVKKSR 180
Cg123722    VPFVPVGSSSSSAACRPQLVDLSFCRRDAVRPEVRTLPQQPPPPPPQQQ*PQHQQVKKSR 180
                                     NLS

Cg135193    RGPRSRSSQYRGVTFYRRTGRWESHIWDCGKQIYLGGFDTAHAAARAYDRAAIKFRGIDA 240
Cg123722    RGPRSRSSQYRGVTFYRRTGRWESHIWDCGKQIYLGGFDTAHAAARAYDRAAIKFRGIDA 240
                                     AP2-R1

Cg135193    DINFNLSDYDDMKLMSNLSKEEFVHILRRQSTGFSRGSSKYRGVTLHKCGRWEARMGQF 300
Cg123722    DINFNLSDYDDMKLMSNLSKEEFVHILRRQSTGFSRGSSKYRGVTLHKCGRWEARMGQF 300
                                     AP2-R2

Cg135193    LGKKYIYLGFLDSEVEAARAYDKAAIRCNGREAVTNFDLSTYEGELISEADTEGHNLDLS 360
Cg123722    LGKKYIYLGFLDSEVEAARAYDKAAIRCNGREAVTNFDLSTYEGELISEADTEGHNLDLS 360

Cg135193    LISIQPASDSPKGDKTPNTVLIQSLSFDSPEVKKSRIIDFPSSFSISQTCRPAEGRHGLPM 420
Cg123722    LISIQPASDSPKGD 374
                                     miR172

Cg135193    WVTQANCFPSFEQSALDKRPETKPIALPSLSWQVHAAGPTSLPSSAASSGFSATAMPAAV 480
Cg123722    ----- 374

Cg135193    PAFPSAPSHKRQLIQSNDKPSAPINIQFNSSGEAYKRKGQNRG- 523
Cg123722    ----- 374

```
