# Supplementary material for: SMRT and Illumina RNA-Seq Identifies Potential Candidate Genes Related to the Double Flower Phenotype and Unveils SsAP2 as a Key Regulator of the Double-Flower Trait in Sagittaria sagittifolia
Source: MDPI journal article supplement (doi:10.3390/ijms23042240), 2022-02-17
Supplement: s1 [file s1]

Supplementary Table 4 Statistics of data filtering from RNA-Seq data of *S. sagittifolia*

| Samples | Total Reads | Uniquely mapped reads % | % of reads mapped to multiple loci | % of reads mapped to too many loci |
|---------|-------------|-------------------------|------------------------------------|------------------------------------|
| SC2-1   | 31,529,264  | 24.31%                  | 59.51%                             | 4.62%                              |
| SC2-2   | 22,284,298  | 23.81%                  | 58.49%                             | 5.08%                              |
| SC2-3   | 21,622,935  | 24.32%                  | 58.36%                             | 4.94%                              |
| SX2-1   | 24,017,219  | 24.62%                  | 58.75%                             | 4.07%                              |
| SX2-2   | 39,127,198  | 24.37%                  | 57.26%                             | 4.40%                              |
| SX2-3   | 22,242,407  | 24.11%                  | 57.17%                             | 4.43%                              |
| DC3-1   | 23,544,845  | 23.35%                  | 60.64%                             | 4.63%                              |
| DC3-2   | 21,169,992  | 22.49%                  | 60.26%                             | 5.24%                              |
| DC3-3   | 26,127,702  | 23.28%                  | 60.78%                             | 4.79%                              |
| DC2-1   | 23,127,300  | 24.63%                  | 60.19%                             | 4.64%                              |
| DC2-2   | 21,620,720  | 23.03%                  | 57.74%                             | 7.65%                              |
| DC2-3   | 22,231,989  | 25.30%                  | 59.92%                             | 4.55%                              |
| DC1-1   | 20,125,975  | 24.04%                  | 57.29%                             | 7.73%                              |
| DC1-2   | 19,648,755  | 25.13%                  | 56.66%                             | 7.12%                              |
| DC1-3   | 24,508,029  | 25.10%                  | 58.34%                             | 6.43%                              |
| SC3-1   | 20,628,133  | 21.49%                  | 56.19%                             | 4.31%                              |
| SC3-2   | 23,152,671  | 22.02%                  | 55.07%                             | 3.85%                              |
| SC3-3   | 25,581,597  | 21.79%                  | 55.53%                             | 4.09%                              |
| SX3-1   | 21,867,569  | 23.58%                  | 53.82%                             | 3.40%                              |
| SX3-2   | 25,198,833  | 22.88%                  | 54.01%                             | 3.84%                              |
| SX3-3   | 27,311,783  | 23.12%                  | 53.15%                             | 3.80%                              |
| SC1-1   | 22,131,161  | 21.95%                  | 52.62%                             | 4.66%                              |
| SC1-2   | 22,849,152  | 23.22%                  | 52.91%                             | 4.12%                              |
| SX1-1   | 22,002,282  | 22.69%                  | 57.55%                             | 5.95%                              |
| SX1-2   | 22,775,623  | 22.77%                  | 55.34%                             | 5.44%                              |
| DX3-1   | 19,897,979  | 22.74%                  | 63.26%                             | 4.43%                              |
| DX3-2   | 29,174,702  | 22.12%                  | 61.87%                             | 4.92%                              |
| DX3-3   | 21,329,167  | 23.04%                  | 60.99%                             | 4.50%                              |
| DX2-1   | 24,057,177  | 23.82%                  | 60.74%                             | 4.30%                              |
| DX2-2   | 24,175,413  | 24.05%                  | 59.75%                             | 4.31%                              |
| DX2-3   | 20,835,011  | 23.82%                  | 60.16%                             | 4.39%                              |
| DX1-1   | 19,823,039  | 25.46%                  | 57.29%                             | 5.08%                              |
| DX1-2   | 21,756,889  | 25.31%                  | 59.01%                             | 5.36%                              |
| DX1-3   | 21,815,010  | 24.88%                  | 59.73%                             | 5.18%                              |
