# Supplementary material for: SMRT and Illumina RNA-Seq Identifies Potential Candidate Genes Related to the Double Flower Phenotype and Unveils SsAP2 as a Key Regulator of the Double-Flower Trait in Sagittaria sagittifolia
Source: Int J Mol Sci. 2022 Feb 17;23(4):2240. doi: 10.3390/ijms23042240 (PMC8875719; doi:10.3390/ijms23042240)
Supplement: Supplementary file 1 [file ijms-23-02240-s001.zip]

Archive with 11 entries (11 files):
- Supplementary Table 1-Primers used for differential gene expression.pdf
- Supplementary Table 2-Statistical analysis of sample sequencing data.pdf
- Supplementary Table 3- Prediction of long non-coding RNA (lncRNA) targets in transcripts.xls
- Supplementary Table 4-. A comparison of second-generation sequencing data with third-generation non-redundant transcript statistics.pdf
- Supplementary Table 5 The annotation of differential expression transcript statistics.xls
- Supplementary Table 6-MADS  andAP2 andTF and up and down DEG.xlsx
- Supplementary Table 7-TF family.xlsx
- Supplementary Table 8-Two AP2 homologous gene sequence alignments and description.pdf
- Supplementary Table 9-Screening and identification of transgenic Sagittaria sagittifolia.pdf
- suppletary Figure1. Observations of the external characteristics of female and male flower (bud) differentiation..tif
- suppletary Figure2-. Quality control of the sequencing data and Sample system cluster diagram..tif
