# Supplementary material for: SMRT and Illumina RNA-Seq Identifies Potential Candidate Genes Related to the Double Flower Phenotype and Unveils SsAP2 as a Key Regulator of the Double-Flower Trait in Sagittaria sagittifolia
Source: Int J Mol Sci. 2022 Feb 17;23(4):2240. doi: 10.3390/ijms23042240 (PMC8875719; doi:10.3390/ijms23042240)
Supplement: Supplementary file 1 [file ijms-23-02240-s001.zip › Supplementary Table 3- Prediction of long non-coding RNA (lncRNA) targets in transcripts.xls]

#lncRNA_ID	Transcript_ID
F01_transcript_148059	F01_transcript_77582
F01_transcript_106704	F01_transcript_101101;F01_transcript_102759;F01_transcript_103167;F01_transcript_104405;F01_transcript_110059;F01_transcript_112595;F01_transcript_114211;F01_transcript_115573;F01_transcript_116576;F01_transcript_119013;F01_transcript_127755;F01_transcript_128427;F01_transcript_135355;F01_transcript_136823;F01_transcript_140043;F01_transcript_141693;F01_transcript_143370;F01_transcript_147563;F01…
F01_transcript_154748	F01_transcript_101149;F01_transcript_101784;F01_transcript_105260;F01_transcript_107424;F01_transcript_109272;F01_transcript_111557;F01_transcript_113609;F01_transcript_114489;F01_transcript_119835;F01_transcript_125307;F01_transcript_125882;F01_transcript_126846;F01_transcript_128802;F01_transcript_130581;F01_transcript_13430;F01_transcript_134706;F01_transcript_138280;F01_transcript_148713;F01_…
F01_transcript_81942	F01_transcript_100479;F01_transcript_101201;F01_transcript_108098;F01_transcript_110250;F01_transcript_110930;F01_transcript_111316;F01_transcript_113398;F01_transcript_114859;F01_transcript_115184;F01_transcript_115807;F01_transcript_117700;F01_transcript_120294;F01_transcript_122387;F01_transcript_123218;F01_transcript_123800;F01_transcript_124854;F01_transcript_126251;F01_transcript_128237;F01…
F01_transcript_74269	F01_transcript_100601;F01_transcript_10236;F01_transcript_10245;F01_transcript_103184;F01_transcript_103551;F01_transcript_104350;F01_transcript_105690;F01_transcript_106136;F01_transcript_108438;F01_transcript_109278;F01_transcript_109587;F01_transcript_110220;F01_transcript_112387;F01_transcript_113980;F01_transcript_116219;F01_transcript_118050;F01_transcript_118525;F01_transcript_119883;F01_t…
F01_transcript_151009	F01_transcript_86873
F01_transcript_118606	F01_transcript_145908;F01_transcript_152244
F01_transcript_126004	F01_transcript_100479;F01_transcript_110250;F01_transcript_110930;F01_transcript_111316;F01_transcript_115184;F01_transcript_116528;F01_transcript_117700;F01_transcript_120294;F01_transcript_122387;F01_transcript_123218;F01_transcript_123800;F01_transcript_124854;F01_transcript_128237;F01_transcript_130366;F01_transcript_131492;F01_transcript_137136;F01_transcript_138518;F01_transcript_138701;F01…
F01_transcript_73097	F01_transcript_102805;F01_transcript_107669;F01_transcript_108703;F01_transcript_109260;F01_transcript_111836;F01_transcript_121301;F01_transcript_122681;F01_transcript_123700;F01_transcript_127259;F01_transcript_127394;F01_transcript_133726;F01_transcript_138192;F01_transcript_138886;F01_transcript_139523;F01_transcript_143752;F01_transcript_147630;F01_transcript_150793;F01_transcript_155649;F01…
F01_transcript_54272	F01_transcript_100067;F01_transcript_100601;F01_transcript_100792;F01_transcript_101274;F01_transcript_101413;F01_transcript_101783;F01_transcript_10236;F01_transcript_10245;F01_transcript_102532;F01_transcript_102659;F01_transcript_102813;F01_transcript_102910;F01_transcript_102929;F01_transcript_102957;F01_transcript_102971;F01_transcript_102991;F01_transcript_103184;F01_transcript_103551;F01_t…
F01_transcript_156274	F01_transcript_15095;F01_transcript_43789;F01_transcript_46835;F01_transcript_70091;F01_transcript_72239
F01_transcript_140624	F01_transcript_83984
F01_transcript_114679	F01_transcript_10000;F01_transcript_103143;F01_transcript_103173;F01_transcript_105144;F01_transcript_105322;F01_transcript_106703;F01_transcript_107326;F01_transcript_107602;F01_transcript_108018;F01_transcript_109742;F01_transcript_117886;F01_transcript_11792;F01_transcript_119842;F01_transcript_122193;F01_transcript_122779;F01_transcript_123409;F01_transcript_124335;F01_transcript_127053;F01_t…
F01_transcript_106694	F01_transcript_110835;F01_transcript_85668
F01_transcript_152915	F01_transcript_100513;F01_transcript_102707;F01_transcript_103099;F01_transcript_104805;F01_transcript_104899;F01_transcript_105674;F01_transcript_106635;F01_transcript_109878;F01_transcript_110138;F01_transcript_110846;F01_transcript_112030;F01_transcript_112749;F01_transcript_114515;F01_transcript_116487;F01_transcript_117077;F01_transcript_121576;F01_transcript_121960;F01_transcript_122323;F01…
F01_transcript_147767	F01_transcript_107596;F01_transcript_147105;F01_transcript_153183;F01_transcript_3588;F01_transcript_7667
F01_transcript_149761	F01_transcript_101631;F01_transcript_101646;F01_transcript_102191;F01_transcript_102759;F01_transcript_104405;F01_transcript_104561;F01_transcript_104642;F01_transcript_107014;F01_transcript_108411;F01_transcript_109036;F01_transcript_109293;F01_transcript_109719;F01_transcript_111723;F01_transcript_111945;F01_transcript_112350;F01_transcript_114300;F01_transcript_114537;F01_transcript_114851;F01…
F01_transcript_98344	F01_transcript_134166;F01_transcript_17311;F01_transcript_29368;F01_transcript_55071;F01_transcript_61992
F01_transcript_115879	F01_transcript_101825;F01_transcript_102291;F01_transcript_102532;F01_transcript_102659;F01_transcript_10302;F01_transcript_105472;F01_transcript_105493;F01_transcript_105594;F01_transcript_105757;F01_transcript_106053;F01_transcript_107605;F01_transcript_107883;F01_transcript_108462;F01_transcript_110005;F01_transcript_11109;F01_transcript_113575;F01_transcript_113763;F01_transcript_114674;F01_t…
F01_transcript_114026	F01_transcript_107838;F01_transcript_121002;F01_transcript_129119;F01_transcript_143536;F01_transcript_146278;F01_transcript_22427;F01_transcript_25202;F01_transcript_30460;F01_transcript_34544;F01_transcript_55654;F01_transcript_57252;F01_transcript_63284;F01_transcript_67555;F01_transcript_86382
F01_transcript_114281	F01_transcript_102636;F01_transcript_102903;F01_transcript_103167;F01_transcript_104735;F01_transcript_104982;F01_transcript_107949;F01_transcript_110059;F01_transcript_111841;F01_transcript_112595;F01_transcript_113661;F01_transcript_113675;F01_transcript_114211;F01_transcript_115163;F01_transcript_115552;F01_transcript_116534;F01_transcript_118395;F01_transcript_121912;F01_transcript_123621;F01…
F01_transcript_97811	F01_transcript_34897;F01_transcript_58159;F01_transcript_63952
F01_transcript_101047	F01_transcript_100009;F01_transcript_100137;F01_transcript_102755;F01_transcript_103192;F01_transcript_103619;F01_transcript_106226;F01_transcript_106729;F01_transcript_112380;F01_transcript_114696;F01_transcript_119181;F01_transcript_119420;F01_transcript_119465;F01_transcript_119591;F01_transcript_119601;F01_transcript_120096;F01_transcript_121026;F01_transcript_122033;F01_transcript_125728;F01…
F01_transcript_87537	F01_transcript_103444;F01_transcript_103854;F01_transcript_103895;F01_transcript_104313;F01_transcript_105617;F01_transcript_111068;F01_transcript_114438;F01_transcript_116218;F01_transcript_117021;F01_transcript_119350;F01_transcript_126560;F01_transcript_126744;F01_transcript_128502;F01_transcript_130755;F01_transcript_133086;F01_transcript_141395;F01_transcript_142430;F01_transcript_145749;F01…
F01_transcript_54118	F01_transcript_48243;F01_transcript_70956
F01_transcript_63064	F01_transcript_103698;F01_transcript_106225;F01_transcript_113114;F01_transcript_113806;F01_transcript_116098;F01_transcript_117768;F01_transcript_118176;F01_transcript_122139;F01_transcript_124591;F01_transcript_126782;F01_transcript_128828;F01_transcript_130520;F01_transcript_132494;F01_transcript_134292;F01_transcript_135269;F01_transcript_136109;F01_transcript_138660;F01_transcript_138692;F01…
F01_transcript_40530	F01_transcript_100479;F01_transcript_101201;F01_transcript_108098;F01_transcript_110250;F01_transcript_110930;F01_transcript_111316;F01_transcript_113398;F01_transcript_114523;F01_transcript_114859;F01_transcript_115184;F01_transcript_115807;F01_transcript_117700;F01_transcript_120294;F01_transcript_122387;F01_transcript_123218;F01_transcript_123800;F01_transcript_124854;F01_transcript_126251;F01…
F01_transcript_91742	F01_transcript_103708;F01_transcript_134055;F01_transcript_137444;F01_transcript_137809;F01_transcript_141392;F01_transcript_25154;F01_transcript_3561;F01_transcript_70317;F01_transcript_72103;F01_transcript_95467
F01_transcript_114965	F01_transcript_105718;F01_transcript_106258;F01_transcript_112155;F01_transcript_129041;F01_transcript_13190;F01_transcript_132305;F01_transcript_133510;F01_transcript_142136;F01_transcript_143127;F01_transcript_147977;F01_transcript_150539;F01_transcript_155696;F01_transcript_35801;F01_transcript_36700;F01_transcript_48228;F01_transcript_49302;F01_transcript_50018;F01_transcript_52152;F01_transc…
F01_transcript_98734	F01_transcript_100357;F01_transcript_101706;F01_transcript_102229;F01_transcript_102420;F01_transcript_104088;F01_transcript_112534;F01_transcript_114455;F01_transcript_114962;F01_transcript_115581;F01_transcript_119637;F01_transcript_120114;F01_transcript_125543;F01_transcript_127377;F01_transcript_129191;F01_transcript_129266;F01_transcript_130414;F01_transcript_132239;F01_transcript_133340;F01…
F01_transcript_122143	F01_transcript_103444;F01_transcript_103854;F01_transcript_103895;F01_transcript_104313;F01_transcript_105617;F01_transcript_111068;F01_transcript_114438;F01_transcript_116218;F01_transcript_117021;F01_transcript_119350;F01_transcript_126560;F01_transcript_126744;F01_transcript_128502;F01_transcript_130755;F01_transcript_133086;F01_transcript_141395;F01_transcript_142430;F01_transcript_145749;F01…
F01_transcript_142541	F01_transcript_103444;F01_transcript_103854;F01_transcript_103895;F01_transcript_104313;F01_transcript_105617;F01_transcript_111068;F01_transcript_114438;F01_transcript_116218;F01_transcript_117021;F01_transcript_119350;F01_transcript_124965;F01_transcript_126560;F01_transcript_126744;F01_transcript_128502;F01_transcript_130755;F01_transcript_133086;F01_transcript_141395;F01_transcript_142430;F01…
F01_transcript_82915	F01_transcript_124679
F01_transcript_112978	F01_transcript_100513;F01_transcript_101906;F01_transcript_102707;F01_transcript_102717;F01_transcript_104805;F01_transcript_104899;F01_transcript_105674;F01_transcript_106635;F01_transcript_109878;F01_transcript_110138;F01_transcript_110846;F01_transcript_112749;F01_transcript_114515;F01_transcript_116487;F01_transcript_117077;F01_transcript_11832;F01_transcript_121576;F01_transcript_121732;F01_…
F01_transcript_138100	F01_transcript_100033;F01_transcript_100911;F01_transcript_101204;F01_transcript_10301;F01_transcript_103143;F01_transcript_104524;F01_transcript_105144;F01_transcript_105322;F01_transcript_105408;F01_transcript_105945;F01_transcript_108009;F01_transcript_108763;F01_transcript_111024;F01_transcript_111724;F01_transcript_111920;F01_transcript_11316;F01_transcript_116174;F01_transcript_11792;F01_tr…
F01_transcript_89020	F01_transcript_101853;F01_transcript_101858;F01_transcript_102494;F01_transcript_103447;F01_transcript_11454;F01_transcript_119416;F01_transcript_120650;F01_transcript_120659;F01_transcript_126425;F01_transcript_130676;F01_transcript_131643;F01_transcript_136713;F01_transcript_137048;F01_transcript_140870;F01_transcript_1456;F01_transcript_149302;F01_transcript_155904;F01_transcript_15832;F01_tra…
F01_transcript_72760	F01_transcript_100015;F01_transcript_101195;F01_transcript_101581;F01_transcript_104451;F01_transcript_105434;F01_transcript_107413;F01_transcript_114000;F01_transcript_115205;F01_transcript_119376;F01_transcript_119696;F01_transcript_125116;F01_transcript_133498;F01_transcript_137441;F01_transcript_138538;F01_transcript_151377;F01_transcript_154753;F01_transcript_2628;F01_transcript_35844;F01_tr…
F01_transcript_69040	F01_transcript_115647
F01_transcript_76646	F01_transcript_34836
F01_transcript_119870	F01_transcript_101371;F01_transcript_112259;F01_transcript_116220;F01_transcript_120777;F01_transcript_121680;F01_transcript_124470;F01_transcript_125455;F01_transcript_126955;F01_transcript_127784;F01_transcript_137966;F01_transcript_139918;F01_transcript_140632;F01_transcript_146097;F01_transcript_147617;F01_transcript_149377;F01_transcript_155157;F01_transcript_16262;F01_transcript_31395;F01_t…
F01_transcript_118976	F01_transcript_100067;F01_transcript_101413;F01_transcript_101783;F01_transcript_10245;F01_transcript_102532;F01_transcript_102910;F01_transcript_102991;F01_transcript_103638;F01_transcript_103760;F01_transcript_104274;F01_transcript_104449;F01_transcript_104459;F01_transcript_104858;F01_transcript_105493;F01_transcript_105929;F01_transcript_106080;F01_transcript_106136;F01_transcript_10622;F01_t…
F01_transcript_94718	F01_transcript_101458;F01_transcript_110240;F01_transcript_111319;F01_transcript_118761;F01_transcript_121387;F01_transcript_132385;F01_transcript_133366;F01_transcript_137236;F01_transcript_143356;F01_transcript_144117;F01_transcript_145202;F01_transcript_154245;F01_transcript_20409;F01_transcript_57140;F01_transcript_58844;F01_transcript_64501;F01_transcript_65430;F01_transcript_66914;F01_trans…
F01_transcript_62807	F01_transcript_100479;F01_transcript_101201;F01_transcript_108098;F01_transcript_110250;F01_transcript_110930;F01_transcript_111316;F01_transcript_113398;F01_transcript_114523;F01_transcript_114859;F01_transcript_115184;F01_transcript_115807;F01_transcript_117700;F01_transcript_120294;F01_transcript_122387;F01_transcript_123218;F01_transcript_123800;F01_transcript_124854;F01_transcript_126251;F01…
F01_transcript_126874	F01_transcript_100232;F01_transcript_101783;F01_transcript_102971;F01_transcript_103638;F01_transcript_104449;F01_transcript_104858;F01_transcript_106136;F01_transcript_106274;F01_transcript_108270;F01_transcript_110154;F01_transcript_111891;F01_transcript_114585;F01_transcript_115084;F01_transcript_115782;F01_transcript_11637;F01_transcript_117992;F01_transcript_118527;F01_transcript_11984;F01_t…
F01_transcript_97889	F01_transcript_11045;F01_transcript_116189;F01_transcript_120573;F01_transcript_147302;F01_transcript_155227;F01_transcript_16811;F01_transcript_20924;F01_transcript_21426;F01_transcript_23112;F01_transcript_30159;F01_transcript_36647;F01_transcript_37063;F01_transcript_41251;F01_transcript_43617;F01_transcript_44884;F01_transcript_46851;F01_transcript_63973;F01_transcript_65676;F01_transcript_72…
F01_transcript_123485	F01_transcript_149545
F01_transcript_54579	F01_transcript_101544;F01_transcript_101631;F01_transcript_101646;F01_transcript_102191;F01_transcript_104035;F01_transcript_104405;F01_transcript_104561;F01_transcript_104642;F01_transcript_107014;F01_transcript_107179;F01_transcript_107530;F01_transcript_108411;F01_transcript_109036;F01_transcript_109293;F01_transcript_109719;F01_transcript_109984;F01_transcript_111723;F01_transcript_111945;F01…
F01_transcript_141169	F01_transcript_101458;F01_transcript_106269;F01_transcript_110240;F01_transcript_111319;F01_transcript_118761;F01_transcript_121387;F01_transcript_132385;F01_transcript_133366;F01_transcript_137236;F01_transcript_143356;F01_transcript_144117;F01_transcript_145202;F01_transcript_154245;F01_transcript_20409;F01_transcript_57140;F01_transcript_58844;F01_transcript_64501;F01_transcript_65430;F01_tran…
F01_transcript_150383	F01_transcript_102482;F01_transcript_108085;F01_transcript_108402;F01_transcript_113065;F01_transcript_114226;F01_transcript_115236;F01_transcript_116730;F01_transcript_116762;F01_transcript_118760;F01_transcript_120798;F01_transcript_126163;F01_transcript_126362;F01_transcript_128119;F01_transcript_128216;F01_transcript_128913;F01_transcript_1312;F01_transcript_134957;F01_transcript_136780;F01_t…
F01_transcript_125383	F01_transcript_103571;F01_transcript_104266;F01_transcript_104597;F01_transcript_105189;F01_transcript_105866;F01_transcript_108607;F01_transcript_109532;F01_transcript_113846;F01_transcript_115148;F01_transcript_117246;F01_transcript_122413;F01_transcript_126068;F01_transcript_126230;F01_transcript_129414;F01_transcript_130112;F01_transcript_131320;F01_transcript_134290;F01_transcript_138142;F01…
F01_transcript_108284	F01_transcript_111120;F01_transcript_117015;F01_transcript_133927;F01_transcript_137584;F01_transcript_142064;F01_transcript_150838;F01_transcript_152118;F01_transcript_20025;F01_transcript_23048;F01_transcript_23809;F01_transcript_58578;F01_transcript_60352;F01_transcript_68803;F01_transcript_92071;F01_transcript_93278
F01_transcript_139750	F01_transcript_108903;F01_transcript_21908;F01_transcript_70239
F01_transcript_145305	F01_transcript_102910;F01_transcript_103760;F01_transcript_106274;F01_transcript_109898;F01_transcript_110507;F01_transcript_120186;F01_transcript_123472;F01_transcript_124295;F01_transcript_13591;F01_transcript_142549;F01_transcript_150203;F01_transcript_153285;F01_transcript_15460;F01_transcript_156004;F01_transcript_19448;F01_transcript_21479;F01_transcript_23235;F01_transcript_23313;F01_trans…
F01_transcript_120213	F01_transcript_101250;F01_transcript_101574;F01_transcript_102159;F01_transcript_103173;F01_transcript_103925;F01_transcript_106251;F01_transcript_106681;F01_transcript_107521;F01_transcript_107602;F01_transcript_108350;F01_transcript_109742;F01_transcript_110451;F01_transcript_112107;F01_transcript_114233;F01_transcript_114237;F01_transcript_116570;F01_transcript_117298;F01_transcript_118561;F01…
F01_transcript_54327	F01_transcript_100067;F01_transcript_101303;F01_transcript_101413;F01_transcript_101753;F01_transcript_101783;F01_transcript_102291;F01_transcript_102532;F01_transcript_102659;F01_transcript_102957;F01_transcript_10302;F01_transcript_103375;F01_transcript_103417;F01_transcript_103760;F01_transcript_104274;F01_transcript_104449;F01_transcript_104459;F01_transcript_105472;F01_transcript_105493;F01_…
F01_transcript_60244	F01_transcript_100437;F01_transcript_104579;F01_transcript_105974;F01_transcript_106162;F01_transcript_107605;F01_transcript_112666;F01_transcript_114708;F01_transcript_115432;F01_transcript_118490;F01_transcript_120263;F01_transcript_12496;F01_transcript_12564;F01_transcript_126051;F01_transcript_128650;F01_transcript_13455;F01_transcript_134553;F01_transcript_138070;F01_transcript_14114;F01_tra…
F01_transcript_114832	F01_transcript_102759;F01_transcript_110031;F01_transcript_127988;F01_transcript_130120;F01_transcript_139336;F01_transcript_19123;F01_transcript_27623;F01_transcript_29516;F01_transcript_77056;F01_transcript_86396;F01_transcript_87546;F01_transcript_91398
F01_transcript_102435	F01_transcript_118559;F01_transcript_147281
F01_transcript_80141	F01_transcript_141155;F01_transcript_79300
F01_transcript_129986	F01_transcript_12365;F01_transcript_133927;F01_transcript_35384;F01_transcript_491;F01_transcript_92071
F01_transcript_134204	F01_transcript_112297;F01_transcript_93688
F01_transcript_65565	F01_transcript_104124;F01_transcript_105651;F01_transcript_107520;F01_transcript_107642;F01_transcript_108000;F01_transcript_111384;F01_transcript_118869;F01_transcript_122248;F01_transcript_122724;F01_transcript_123934;F01_transcript_127157;F01_transcript_127567;F01_transcript_128570;F01_transcript_134006;F01_transcript_138915;F01_transcript_139652;F01_transcript_139950;F01_transcript_150494;F01…
F01_transcript_148028	F01_transcript_100513;F01_transcript_101906;F01_transcript_102707;F01_transcript_102717;F01_transcript_104805;F01_transcript_104899;F01_transcript_105674;F01_transcript_106635;F01_transcript_109878;F01_transcript_110138;F01_transcript_110846;F01_transcript_112749;F01_transcript_114515;F01_transcript_116487;F01_transcript_117077;F01_transcript_11832;F01_transcript_121576;F01_transcript_121732;F01_…
F01_transcript_92398	F01_transcript_112537;F01_transcript_122525;F01_transcript_122811;F01_transcript_135377;F01_transcript_140532;F01_transcript_142708;F01_transcript_31873;F01_transcript_45971;F01_transcript_46012;F01_transcript_47200;F01_transcript_77692;F01_transcript_88647;F01_transcript_90427
F01_transcript_61001	F01_transcript_105581;F01_transcript_110740;F01_transcript_111945;F01_transcript_127598;F01_transcript_132923;F01_transcript_135223;F01_transcript_142038;F01_transcript_143932;F01_transcript_58689;F01_transcript_62100;F01_transcript_91030
F01_transcript_79343	F01_transcript_100354;F01_transcript_101974;F01_transcript_102310;F01_transcript_102401;F01_transcript_104568;F01_transcript_106204;F01_transcript_106930;F01_transcript_108068;F01_transcript_108318;F01_transcript_111346;F01_transcript_113198;F01_transcript_113318;F01_transcript_113364;F01_transcript_113730;F01_transcript_113741;F01_transcript_113938;F01_transcript_114098;F01_transcript_114122;F01…
F01_transcript_108639	F01_transcript_26647;F01_transcript_44893;F01_transcript_64478;F01_transcript_71763;F01_transcript_74041
F01_transcript_78256	F01_transcript_100792;F01_transcript_100868;F01_transcript_104131;F01_transcript_106404;F01_transcript_111865;F01_transcript_11637;F01_transcript_123229;F01_transcript_127801;F01_transcript_133288;F01_transcript_149345;F01_transcript_16662;F01_transcript_23039;F01_transcript_23290;F01_transcript_29911;F01_transcript_30956;F01_transcript_31283;F01_transcript_33601;F01_transcript_34666;F01_transcri…
F01_transcript_109666	F01_transcript_152558
F01_transcript_138207	F01_transcript_127548
F01_transcript_125508	F01_transcript_100009;F01_transcript_100137;F01_transcript_102755;F01_transcript_103192;F01_transcript_103619;F01_transcript_106226;F01_transcript_106729;F01_transcript_112380;F01_transcript_114696;F01_transcript_119181;F01_transcript_119420;F01_transcript_119465;F01_transcript_119591;F01_transcript_119601;F01_transcript_120096;F01_transcript_121026;F01_transcript_122033;F01_transcript_125728;F01…
F01_transcript_146290	F01_transcript_105286;F01_transcript_93808
F01_transcript_109118	F01_transcript_101579;F01_transcript_102715;F01_transcript_109521;F01_transcript_109787;F01_transcript_109795;F01_transcript_110806;F01_transcript_111759;F01_transcript_112059;F01_transcript_113279;F01_transcript_119911;F01_transcript_120955;F01_transcript_121025;F01_transcript_12404;F01_transcript_128888;F01_transcript_129362;F01_transcript_131914;F01_transcript_137220;F01_transcript_140262;F01_…
F01_transcript_53048	F01_transcript_142966;F01_transcript_29613;F01_transcript_44717;F01_transcript_45902;F01_transcript_46349;F01_transcript_46607;F01_transcript_48504;F01_transcript_51106;F01_transcript_51849;F01_transcript_64224;F01_transcript_65229;F01_transcript_72543
F01_transcript_51947	F01_transcript_15213;F01_transcript_2194;F01_transcript_42687;F01_transcript_42773
F01_transcript_84433	F01_transcript_100630;F01_transcript_100843;F01_transcript_101134;F01_transcript_103307;F01_transcript_104492;F01_transcript_104911;F01_transcript_108062;F01_transcript_108139;F01_transcript_112942;F01_transcript_113672;F01_transcript_114067;F01_transcript_115843;F01_transcript_116560;F01_transcript_118129;F01_transcript_119836;F01_transcript_12277;F01_transcript_126087;F01_transcript_126218;F01_…
F01_transcript_53999	F01_transcript_102336;F01_transcript_104833;F01_transcript_110150;F01_transcript_112155;F01_transcript_113598;F01_transcript_115832;F01_transcript_118127;F01_transcript_119009;F01_transcript_124909;F01_transcript_125578;F01_transcript_129041;F01_transcript_13190;F01_transcript_132305;F01_transcript_134651;F01_transcript_134939;F01_transcript_136714;F01_transcript_139148;F01_transcript_142136;F01_…
F01_transcript_127572	F01_transcript_106430;F01_transcript_107792;F01_transcript_10876;F01_transcript_111094;F01_transcript_115812;F01_transcript_11827;F01_transcript_121666;F01_transcript_12498;F01_transcript_132705;F01_transcript_134055;F01_transcript_137809;F01_transcript_141247;F01_transcript_141392;F01_transcript_152511;F01_transcript_2263;F01_transcript_25154;F01_transcript_2971;F01_transcript_30227;F01_transcri…
F01_transcript_87085	F01_transcript_107488;F01_transcript_107813;F01_transcript_108500;F01_transcript_110328;F01_transcript_111062;F01_transcript_111138;F01_transcript_113822;F01_transcript_114188;F01_transcript_115647;F01_transcript_116250;F01_transcript_120682;F01_transcript_120830;F01_transcript_124101;F01_transcript_124638;F01_transcript_125540;F01_transcript_127341;F01_transcript_131035;F01_transcript_131282;F01…
F01_transcript_50164	F01_transcript_100397;F01_transcript_100414;F01_transcript_100429;F01_transcript_101081;F01_transcript_101416;F01_transcript_101430;F01_transcript_101592;F01_transcript_101636;F01_transcript_101900;F01_transcript_101911;F01_transcript_102341;F01_transcript_102527;F01_transcript_102555;F01_transcript_102951;F01_transcript_103329;F01_transcript_103654;F01_transcript_103730;F01_transcript_103963;F01…
F01_transcript_147446	F01_transcript_107242;F01_transcript_110098;F01_transcript_114632;F01_transcript_148488;F01_transcript_151754;F01_transcript_154733;F01_transcript_26292;F01_transcript_34531;F01_transcript_62246;F01_transcript_76003;F01_transcript_87888;F01_transcript_90510;F01_transcript_91759;F01_transcript_99651
F01_transcript_150339	F01_transcript_102245;F01_transcript_103215;F01_transcript_103263;F01_transcript_104893;F01_transcript_106776;F01_transcript_107242;F01_transcript_11161;F01_transcript_113555;F01_transcript_114533;F01_transcript_114790;F01_transcript_116236;F01_transcript_116450;F01_transcript_117010;F01_transcript_117011;F01_transcript_120033;F01_transcript_122683;F01_transcript_125620;F01_transcript_126343;F01_…
F01_transcript_53469	F01_transcript_100513;F01_transcript_101906;F01_transcript_102707;F01_transcript_102717;F01_transcript_104805;F01_transcript_104899;F01_transcript_105674;F01_transcript_106635;F01_transcript_109878;F01_transcript_110138;F01_transcript_110846;F01_transcript_112749;F01_transcript_114515;F01_transcript_116487;F01_transcript_117077;F01_transcript_11832;F01_transcript_121576;F01_transcript_121732;F01_…
F01_transcript_42315	F01_transcript_100011;F01_transcript_100192;F01_transcript_100923;F01_transcript_103165;F01_transcript_103525;F01_transcript_1040;F01_transcript_104439;F01_transcript_104572;F01_transcript_104622;F01_transcript_104776;F01_transcript_105227;F01_transcript_105409;F01_transcript_105411;F01_transcript_105556;F01_transcript_105898;F01_transcript_105974;F01_transcript_106177;F01_transcript_106389;F01_t…
F01_transcript_129058	F01_transcript_101208;F01_transcript_112892;F01_transcript_113163;F01_transcript_117565;F01_transcript_117855;F01_transcript_119276;F01_transcript_123126;F01_transcript_127716;F01_transcript_135669;F01_transcript_139808;F01_transcript_142594;F01_transcript_148987;F01_transcript_152763;F01_transcript_154208;F01_transcript_23097;F01_transcript_27429;F01_transcript_60002;F01_transcript_60210;F01_tra…
F01_transcript_127012	F01_transcript_102805;F01_transcript_107669;F01_transcript_108703;F01_transcript_109260;F01_transcript_111836;F01_transcript_121301;F01_transcript_122681;F01_transcript_123700;F01_transcript_127259;F01_transcript_127394;F01_transcript_133726;F01_transcript_138192;F01_transcript_138886;F01_transcript_139523;F01_transcript_143752;F01_transcript_147630;F01_transcript_150793;F01_transcript_155649;F01…
F01_transcript_54359	F01_transcript_100432;F01_transcript_105795;F01_transcript_106159;F01_transcript_107186;F01_transcript_115005;F01_transcript_117257;F01_transcript_124197;F01_transcript_124362;F01_transcript_125353;F01_transcript_126302;F01_transcript_129082;F01_transcript_133072;F01_transcript_135640;F01_transcript_13582;F01_transcript_142819;F01_transcript_145478;F01_transcript_145894;F01_transcript_146950;F01_…
F01_transcript_145160	F01_transcript_10000;F01_transcript_101567;F01_transcript_101998;F01_transcript_10283;F01_transcript_103143;F01_transcript_103173;F01_transcript_103925;F01_transcript_104524;F01_transcript_105144;F01_transcript_105322;F01_transcript_105441;F01_transcript_106466;F01_transcript_107326;F01_transcript_108018;F01_transcript_108763;F01_transcript_109109;F01_transcript_111024;F01_transcript_117886;F01_t…
F01_transcript_54944	F01_transcript_101371;F01_transcript_112259;F01_transcript_113507;F01_transcript_116220;F01_transcript_120777;F01_transcript_124470;F01_transcript_125455;F01_transcript_126955;F01_transcript_127784;F01_transcript_137966;F01_transcript_139918;F01_transcript_140632;F01_transcript_146097;F01_transcript_147617;F01_transcript_149377;F01_transcript_155157;F01_transcript_31395;F01_transcript_42177;F01_t…
F01_transcript_54048	F01_transcript_58667
F01_transcript_9792	F01_transcript_100418;F01_transcript_104762;F01_transcript_104934;F01_transcript_105840;F01_transcript_112594;F01_transcript_113271;F01_transcript_113614;F01_transcript_115070;F01_transcript_115788;F01_transcript_128091;F01_transcript_130561;F01_transcript_130615;F01_transcript_138688;F01_transcript_144154;F01_transcript_144567;F01_transcript_149493;F01_transcript_149587;F01_transcript_149973;F01…
F01_transcript_55215	F01_transcript_114192;F01_transcript_115832;F01_transcript_131643;F01_transcript_155565;F01_transcript_22801;F01_transcript_32673;F01_transcript_39026;F01_transcript_40570;F01_transcript_50018;F01_transcript_51799;F01_transcript_53386;F01_transcript_76123
F01_transcript_129222	F01_transcript_100397;F01_transcript_100414;F01_transcript_101081;F01_transcript_101416;F01_transcript_101430;F01_transcript_101592;F01_transcript_101911;F01_transcript_102527;F01_transcript_103329;F01_transcript_103963;F01_transcript_104773;F01_transcript_104819;F01_transcript_105612;F01_transcript_105694;F01_transcript_106261;F01_transcript_106416;F01_transcript_106973;F01_transcript_107369;F01…
F01_transcript_100668	F01_transcript_143204
F01_transcript_20536	F01_transcript_102707;F01_transcript_103291;F01_transcript_104805;F01_transcript_105674;F01_transcript_106635;F01_transcript_109878;F01_transcript_110138;F01_transcript_112749;F01_transcript_116487;F01_transcript_117077;F01_transcript_118268;F01_transcript_121960;F01_transcript_122323;F01_transcript_123959;F01_transcript_126884;F01_transcript_131541;F01_transcript_131967;F01_transcript_132215;F01…
F01_transcript_61181	F01_transcript_103948;F01_transcript_128146
F01_transcript_128557	F01_transcript_103571;F01_transcript_104266;F01_transcript_104597;F01_transcript_105189;F01_transcript_105866;F01_transcript_108607;F01_transcript_109532;F01_transcript_113846;F01_transcript_115148;F01_transcript_117246;F01_transcript_122413;F01_transcript_126068;F01_transcript_126230;F01_transcript_129414;F01_transcript_130112;F01_transcript_131320;F01_transcript_134290;F01_transcript_138142;F01…
F01_transcript_85766	F01_transcript_105927;F01_transcript_109116;F01_transcript_118210;F01_transcript_118803;F01_transcript_132055;F01_transcript_132145;F01_transcript_137892;F01_transcript_144212;F01_transcript_144372;F01_transcript_146284;F01_transcript_149136;F01_transcript_152638;F01_transcript_155116;F01_transcript_23773;F01_transcript_40709;F01_transcript_41620;F01_transcript_43317;F01_transcript_49419;F01_tran…
F01_transcript_101484	F01_transcript_107442;F01_transcript_110318;F01_transcript_121071;F01_transcript_124887;F01_transcript_142064;F01_transcript_14287;F01_transcript_38447;F01_transcript_56388;F01_transcript_59359;F01_transcript_63437;F01_transcript_66256;F01_transcript_68803;F01_transcript_82143;F01_transcript_82816;F01_transcript_82860
F01_transcript_79661	F01_transcript_124990;F01_transcript_127550;F01_transcript_134358;F01_transcript_147852
F01_transcript_72395	F01_transcript_102482;F01_transcript_109600;F01_transcript_109742;F01_transcript_111289;F01_transcript_111662;F01_transcript_114237;F01_transcript_116538;F01_transcript_118561;F01_transcript_11886;F01_transcript_123963;F01_transcript_123978;F01_transcript_125883;F01_transcript_128486;F01_transcript_130187;F01_transcript_130430;F01_transcript_131216;F01_transcript_131933;F01_transcript_135227;F01_…
F01_transcript_140283	F01_transcript_112005;F01_transcript_112197;F01_transcript_116662;F01_transcript_128618;F01_transcript_131170;F01_transcript_131299;F01_transcript_136556;F01_transcript_137337;F01_transcript_148243;F01_transcript_20170;F01_transcript_55244;F01_transcript_66029;F01_transcript_68412;F01_transcript_71392;F01_transcript_76086;F01_transcript_84981;F01_transcript_94130;F01_transcript_94838;F01_transcri…
F01_transcript_94263	F01_transcript_133025;F01_transcript_86562
F01_transcript_99263	F01_transcript_103571;F01_transcript_104266;F01_transcript_104597;F01_transcript_105866;F01_transcript_108607;F01_transcript_109532;F01_transcript_113846;F01_transcript_115148;F01_transcript_117246;F01_transcript_122413;F01_transcript_126068;F01_transcript_126230;F01_transcript_129414;F01_transcript_130112;F01_transcript_131320;F01_transcript_134290;F01_transcript_138142;F01_transcript_143658;F01…
F01_transcript_95251	F01_transcript_100908;F01_transcript_101229;F01_transcript_101398;F01_transcript_102785;F01_transcript_102897;F01_transcript_105001;F01_transcript_105801;F01_transcript_106348;F01_transcript_107235;F01_transcript_109324;F01_transcript_109682;F01_transcript_110843;F01_transcript_113663;F01_transcript_120864;F01_transcript_121002;F01_transcript_121008;F01_transcript_122537;F01_transcript_124679;F01…
F01_transcript_61551	F01_transcript_100479;F01_transcript_101201;F01_transcript_108098;F01_transcript_110250;F01_transcript_110930;F01_transcript_111316;F01_transcript_113398;F01_transcript_114859;F01_transcript_115184;F01_transcript_115807;F01_transcript_117700;F01_transcript_120294;F01_transcript_122387;F01_transcript_123218;F01_transcript_123800;F01_transcript_124854;F01_transcript_126251;F01_transcript_128237;F01…
F01_transcript_83773	F01_transcript_101081;F01_transcript_10766;F01_transcript_108322;F01_transcript_111117;F01_transcript_112836;F01_transcript_120049;F01_transcript_127957;F01_transcript_130209;F01_transcript_131117;F01_transcript_131658;F01_transcript_13236;F01_transcript_135143;F01_transcript_137426;F01_transcript_140818;F01_transcript_141219;F01_transcript_142172;F01_transcript_142552;F01_transcript_143048;F01_t…
F01_transcript_130412	F01_transcript_131095;F01_transcript_25972;F01_transcript_71330
F01_transcript_80525	F01_transcript_10152;F01_transcript_102813;F01_transcript_104131;F01_transcript_104929;F01_transcript_112925;F01_transcript_113715;F01_transcript_117904;F01_transcript_118752;F01_transcript_119525;F01_transcript_123466;F01_transcript_125357;F01_transcript_12645;F01_transcript_128679;F01_transcript_129355;F01_transcript_130811;F01_transcript_133398;F01_transcript_138925;F01_transcript_140097;F01_t…
F01_transcript_104095	F01_transcript_100015;F01_transcript_100532;F01_transcript_101195;F01_transcript_104451;F01_transcript_105434;F01_transcript_107413;F01_transcript_109309;F01_transcript_114000;F01_transcript_119376;F01_transcript_119696;F01_transcript_121202;F01_transcript_125116;F01_transcript_133498;F01_transcript_137441;F01_transcript_138538;F01_transcript_142856;F01_transcript_151377;F01_transcript_154753;F01…
F01_transcript_95210	F01_transcript_102138;F01_transcript_106752;F01_transcript_108864;F01_transcript_115715;F01_transcript_115844;F01_transcript_120325;F01_transcript_121689;F01_transcript_123251;F01_transcript_128408;F01_transcript_131577;F01_transcript_131763;F01_transcript_136088;F01_transcript_136658;F01_transcript_138774;F01_transcript_138864;F01_transcript_144832;F01_transcript_148200;F01_transcript_148819;F01…
F01_transcript_84673	F01_transcript_103319;F01_transcript_57902;F01_transcript_59916;F01_transcript_60023
F01_transcript_89186	F01_transcript_100028;F01_transcript_100368;F01_transcript_100666;F01_transcript_100693;F01_transcript_101375;F01_transcript_101432;F01_transcript_101559;F01_transcript_101662;F01_transcript_102359;F01_transcript_102893;F01_transcript_103641;F01_transcript_104929;F01_transcript_105791;F01_transcript_107306;F01_transcript_109863;F01_transcript_112178;F01_transcript_112530;F01_transcript_113740;F01…
F01_transcript_82827	F01_transcript_106752;F01_transcript_108864;F01_transcript_115715;F01_transcript_115844;F01_transcript_120325;F01_transcript_121689;F01_transcript_123251;F01_transcript_128408;F01_transcript_131577;F01_transcript_131763;F01_transcript_136088;F01_transcript_136658;F01_transcript_138774;F01_transcript_138864;F01_transcript_144832;F01_transcript_148200;F01_transcript_148819;F01_transcript_154418;F01…
F01_transcript_69208	F01_transcript_100015;F01_transcript_101195;F01_transcript_101581;F01_transcript_104451;F01_transcript_105434;F01_transcript_114000;F01_transcript_115205;F01_transcript_119376;F01_transcript_119696;F01_transcript_125116;F01_transcript_137441;F01_transcript_138538;F01_transcript_151377;F01_transcript_154753;F01_transcript_35844;F01_transcript_5055;F01_transcript_57002;F01_transcript_62343;F01_tran…
F01_transcript_127434	F01_transcript_104561
F01_transcript_11028	F01_transcript_93379
F01_transcript_107466	F01_transcript_102845;F01_transcript_103051;F01_transcript_105392;F01_transcript_110026;F01_transcript_113894;F01_transcript_116189;F01_transcript_116984;F01_transcript_117678;F01_transcript_119346;F01_transcript_12099;F01_transcript_121268;F01_transcript_123235;F01_transcript_125045;F01_transcript_128650;F01_transcript_13084;F01_transcript_134444;F01_transcript_136166;F01_transcript_143490;F01_t…
F01_transcript_79759	F01_transcript_44286;F01_transcript_45253;F01_transcript_82772
F01_transcript_128809	F01_transcript_102805;F01_transcript_107669;F01_transcript_108703;F01_transcript_109260;F01_transcript_111836;F01_transcript_121301;F01_transcript_122681;F01_transcript_123700;F01_transcript_127259;F01_transcript_127394;F01_transcript_133726;F01_transcript_138192;F01_transcript_138886;F01_transcript_139523;F01_transcript_143752;F01_transcript_147630;F01_transcript_150793;F01_transcript_155649;F01…
F01_transcript_54380	F01_transcript_103642
F01_transcript_106640	F01_transcript_154396;F01_transcript_64745;F01_transcript_69462
F01_transcript_47147	F01_transcript_110150;F01_transcript_112155;F01_transcript_115832;F01_transcript_13190;F01_transcript_134651;F01_transcript_142995;F01_transcript_143127;F01_transcript_149107;F01_transcript_23639;F01_transcript_32673;F01_transcript_32850;F01_transcript_35801;F01_transcript_36217;F01_transcript_39277;F01_transcript_40893;F01_transcript_41934;F01_transcript_47011;F01_transcript_50018;F01_transcript…
F01_transcript_150674	F01_transcript_100085;F01_transcript_103302;F01_transcript_103664;F01_transcript_107862;F01_transcript_118880;F01_transcript_124751;F01_transcript_12982;F01_transcript_130600;F01_transcript_137833;F01_transcript_138973;F01_transcript_141039;F01_transcript_151426;F01_transcript_155122;F01_transcript_25793;F01_transcript_26942;F01_transcript_30549;F01_transcript_36173;F01_transcript_39656;F01_trans…
F01_transcript_104964	F01_transcript_101079;F01_transcript_102636;F01_transcript_103167;F01_transcript_103441;F01_transcript_104527;F01_transcript_104735;F01_transcript_104775;F01_transcript_107526;F01_transcript_109674;F01_transcript_110059;F01_transcript_111105;F01_transcript_111841;F01_transcript_113570;F01_transcript_114945;F01_transcript_115552;F01_transcript_115850;F01_transcript_116534;F01_transcript_116737;F01…
F01_transcript_78151	F01_transcript_100797;F01_transcript_118536;F01_transcript_132521;F01_transcript_135942;F01_transcript_137259;F01_transcript_24316;F01_transcript_39621;F01_transcript_57777;F01_transcript_88146;F01_transcript_91150
F01_transcript_27928	F01_transcript_102017;F01_transcript_107438;F01_transcript_107838;F01_transcript_113366;F01_transcript_115665;F01_transcript_121002;F01_transcript_124273;F01_transcript_126882;F01_transcript_129119;F01_transcript_131113;F01_transcript_131603;F01_transcript_134090;F01_transcript_143536;F01_transcript_146278;F01_transcript_149085;F01_transcript_150158;F01_transcript_15724;F01_transcript_16756;F01_t…
F01_transcript_101516	F01_transcript_100304;F01_transcript_100895;F01_transcript_103645;F01_transcript_105118;F01_transcript_106584;F01_transcript_107046;F01_transcript_107530;F01_transcript_11098;F01_transcript_11201;F01_transcript_112536;F01_transcript_113471;F01_transcript_116411;F01_transcript_116450;F01_transcript_116626;F01_transcript_117361;F01_transcript_118101;F01_transcript_118210;F01_transcript_118789;F01_t…
F01_transcript_75433	F01_transcript_100397;F01_transcript_100414;F01_transcript_100429;F01_transcript_101081;F01_transcript_101416;F01_transcript_101430;F01_transcript_101592;F01_transcript_101900;F01_transcript_101911;F01_transcript_101992;F01_transcript_102527;F01_transcript_102555;F01_transcript_103329;F01_transcript_103963;F01_transcript_104773;F01_transcript_104819;F01_transcript_105612;F01_transcript_105694;F01…
F01_transcript_72984	F01_transcript_125045;F01_transcript_149992;F01_transcript_29451;F01_transcript_43877;F01_transcript_45087;F01_transcript_48656;F01_transcript_49357;F01_transcript_50583;F01_transcript_51062;F01_transcript_52619
F01_transcript_131524	F01_transcript_3585
F01_transcript_135185	F01_transcript_119091
F01_transcript_120031	F01_transcript_69327;F01_transcript_98301
F01_transcript_138673	F01_transcript_91535
F01_transcript_76803	F01_transcript_98301
F01_transcript_83739	F01_transcript_102336;F01_transcript_110150;F01_transcript_112155;F01_transcript_115832;F01_transcript_118127;F01_transcript_124909;F01_transcript_125578;F01_transcript_129041;F01_transcript_13190;F01_transcript_132305;F01_transcript_132944;F01_transcript_133510;F01_transcript_134651;F01_transcript_134939;F01_transcript_138457;F01_transcript_139148;F01_transcript_141432;F01_transcript_142136;F01_…
F01_transcript_100415	F01_transcript_100403;F01_transcript_102019;F01_transcript_102843;F01_transcript_10302;F01_transcript_103920;F01_transcript_105286;F01_transcript_107714;F01_transcript_108114;F01_transcript_110650;F01_transcript_113774;F01_transcript_114674;F01_transcript_117371;F01_transcript_117722;F01_transcript_121172;F01_transcript_121561;F01_transcript_1234;F01_transcript_123803;F01_transcript_124318;F01_tr…
F01_transcript_132822	F01_transcript_119232;F01_transcript_129261;F01_transcript_49488;F01_transcript_74551
F01_transcript_47170	F01_transcript_105974;F01_transcript_106096;F01_transcript_109500;F01_transcript_112772;F01_transcript_116189;F01_transcript_117678;F01_transcript_118490;F01_transcript_11937;F01_transcript_128650;F01_transcript_147302;F01_transcript_150510;F01_transcript_155227;F01_transcript_16831;F01_transcript_23112;F01_transcript_27986;F01_transcript_2949;F01_transcript_30159;F01_transcript_33000;F01_transcr…
F01_transcript_104902	F01_transcript_101125;F01_transcript_106651;F01_transcript_106828;F01_transcript_109201;F01_transcript_125188;F01_transcript_125303;F01_transcript_125492;F01_transcript_128505;F01_transcript_134143;F01_transcript_134298;F01_transcript_134669;F01_transcript_137681;F01_transcript_140148;F01_transcript_141304;F01_transcript_149625;F01_transcript_152217;F01_transcript_153348;F01_transcript_154431;F01…
F01_transcript_123672	F01_transcript_5752;F01_transcript_89427
F01_transcript_91598	F01_transcript_103955;F01_transcript_104348;F01_transcript_113110;F01_transcript_145484;F01_transcript_39249;F01_transcript_91088
F01_transcript_51666	F01_transcript_101112;F01_transcript_102957;F01_transcript_110949;F01_transcript_111914;F01_transcript_112934;F01_transcript_114831;F01_transcript_115;F01_transcript_115031;F01_transcript_115773;F01_transcript_116018;F01_transcript_116808;F01_transcript_12439;F01_transcript_125445;F01_transcript_125495;F01_transcript_137536;F01_transcript_139258;F01_transcript_143636;F01_transcript_144352;F01_tra…
F01_transcript_153185	F01_transcript_100333;F01_transcript_101774;F01_transcript_103297;F01_transcript_103424;F01_transcript_103448;F01_transcript_105695;F01_transcript_105816;F01_transcript_112265;F01_transcript_113684;F01_transcript_114287;F01_transcript_123895;F01_transcript_123906;F01_transcript_125421;F01_transcript_128260;F01_transcript_133426;F01_transcript_134247;F01_transcript_140677;F01_transcript_140873;F01…
F01_transcript_152382	F01_transcript_58174
F01_transcript_111755	F01_transcript_137619;F01_transcript_2010;F01_transcript_20811;F01_transcript_58578
F01_transcript_127290	F01_transcript_100972;F01_transcript_103211;F01_transcript_103964;F01_transcript_119976;F01_transcript_122293;F01_transcript_129410;F01_transcript_141730;F01_transcript_141817;F01_transcript_144064;F01_transcript_145260;F01_transcript_147673;F01_transcript_148864;F01_transcript_149372;F01_transcript_151717;F01_transcript_153494;F01_transcript_1542;F01_transcript_54959;F01_transcript_55554;F01_tra…
F01_transcript_127807	F01_transcript_101432
F01_transcript_52323	F01_transcript_100354;F01_transcript_101974;F01_transcript_102401;F01_transcript_102766;F01_transcript_104568;F01_transcript_106930;F01_transcript_108068;F01_transcript_108628;F01_transcript_111308;F01_transcript_111346;F01_transcript_113318;F01_transcript_113364;F01_transcript_113741;F01_transcript_114098;F01_transcript_114525;F01_transcript_114817;F01_transcript_115188;F01_transcript_116548;F01…
F01_transcript_123586	F01_transcript_101398;F01_transcript_102897;F01_transcript_105001;F01_transcript_105801;F01_transcript_106348;F01_transcript_106451;F01_transcript_107235;F01_transcript_108532;F01_transcript_109324;F01_transcript_109455;F01_transcript_109682;F01_transcript_110843;F01_transcript_113663;F01_transcript_120575;F01_transcript_120864;F01_transcript_121002;F01_transcript_121008;F01_transcript_122537;F01…
F01_transcript_82377	F01_transcript_101398;F01_transcript_102897;F01_transcript_106451;F01_transcript_107235;F01_transcript_110843;F01_transcript_121008;F01_transcript_143018;F01_transcript_147488;F01_transcript_151201;F01_transcript_151458;F01_transcript_19231;F01_transcript_20549;F01_transcript_48259;F01_transcript_57433;F01_transcript_65143;F01_transcript_65497;F01_transcript_74519;F01_transcript_78106;F01_transcr…
F01_transcript_70324	F01_transcript_100521;F01_transcript_101662;F01_transcript_102582;F01_transcript_102607;F01_transcript_10295;F01_transcript_103953;F01_transcript_104592;F01_transcript_104644;F01_transcript_105346;F01_transcript_105886;F01_transcript_10672;F01_transcript_106771;F01_transcript_107193;F01_transcript_107306;F01_transcript_108447;F01_transcript_108451;F01_transcript_108512;F01_transcript_109565;F01_t…
F01_transcript_154447	F01_transcript_105286;F01_transcript_106430;F01_transcript_107714;F01_transcript_107792;F01_transcript_108114;F01_transcript_110650;F01_transcript_112758;F01_transcript_117783;F01_transcript_11827;F01_transcript_120047;F01_transcript_121774;F01_transcript_122510;F01_transcript_123803;F01_transcript_124318;F01_transcript_128485;F01_transcript_129145;F01_transcript_129424;F01_transcript_134007;F01_…
F01_transcript_123888	F01_transcript_108977
F01_transcript_118594	F01_transcript_91991
F01_transcript_127709	F01_transcript_128821;F01_transcript_144453;F01_transcript_24811;F01_transcript_47056
F01_transcript_89782	F01_transcript_128405;F01_transcript_130456;F01_transcript_131247;F01_transcript_132723;F01_transcript_146179;F01_transcript_152689;F01_transcript_20639;F01_transcript_33352;F01_transcript_34612;F01_transcript_88946
F01_transcript_145551	F01_transcript_100486;F01_transcript_105699;F01_transcript_117805;F01_transcript_118635;F01_transcript_130984;F01_transcript_132394;F01_transcript_137809;F01_transcript_146673;F01_transcript_149207;F01_transcript_149341;F01_transcript_152731;F01_transcript_2654;F01_transcript_32;F01_transcript_55892;F01_transcript_68961;F01_transcript_70317;F01_transcript_84534;F01_transcript_87620;F01_transcript…
F01_transcript_116475	F01_transcript_98140
F01_transcript_78214	F01_transcript_101125;F01_transcript_106651;F01_transcript_106828;F01_transcript_109201;F01_transcript_125188;F01_transcript_125303;F01_transcript_125492;F01_transcript_128505;F01_transcript_134143;F01_transcript_134264;F01_transcript_134298;F01_transcript_134669;F01_transcript_137681;F01_transcript_140148;F01_transcript_149625;F01_transcript_152217;F01_transcript_153348;F01_transcript_154431;F01…
F01_transcript_64721	F01_transcript_129596;F01_transcript_45757
F01_transcript_82678	F01_transcript_101413;F01_transcript_10236;F01_transcript_102800;F01_transcript_102875;F01_transcript_102916;F01_transcript_102971;F01_transcript_102991;F01_transcript_103638;F01_transcript_104449;F01_transcript_104459;F01_transcript_105236;F01_transcript_105334;F01_transcript_105707;F01_transcript_105929;F01_transcript_106136;F01_transcript_106404;F01_transcript_106734;F01_transcript_109101;F01_…
F01_transcript_126480	F01_transcript_101125;F01_transcript_106651;F01_transcript_106828;F01_transcript_109201;F01_transcript_125188;F01_transcript_125303;F01_transcript_125492;F01_transcript_126651;F01_transcript_128505;F01_transcript_134143;F01_transcript_134264;F01_transcript_134298;F01_transcript_134669;F01_transcript_137681;F01_transcript_140148;F01_transcript_141304;F01_transcript_149625;F01_transcript_152217;F01…
F01_transcript_102271	F01_transcript_102116;F01_transcript_105699;F01_transcript_106206;F01_transcript_110525;F01_transcript_110641;F01_transcript_111120;F01_transcript_112047;F01_transcript_113914;F01_transcript_120776;F01_transcript_132394;F01_transcript_132716;F01_transcript_134098;F01_transcript_141868;F01_transcript_144294;F01_transcript_151694;F01_transcript_4055;F01_transcript_491;F01_transcript_59086;F01_trans…
F01_transcript_109176	F01_transcript_100107;F01_transcript_102715;F01_transcript_105151;F01_transcript_107896;F01_transcript_109795;F01_transcript_111503;F01_transcript_115344;F01_transcript_116619;F01_transcript_116805;F01_transcript_116847;F01_transcript_118296;F01_transcript_119285;F01_transcript_119745;F01_transcript_120284;F01_transcript_120403;F01_transcript_121025;F01_transcript_122570;F01_transcript_124249;F01…
F01_transcript_71136	F01_transcript_71603
F01_transcript_99915	F01_transcript_100658;F01_transcript_102482;F01_transcript_106108;F01_transcript_106681;F01_transcript_107521;F01_transcript_108286;F01_transcript_108350;F01_transcript_108402;F01_transcript_109742;F01_transcript_111459;F01_transcript_112493;F01_transcript_114233;F01_transcript_116538;F01_transcript_116570;F01_transcript_118561;F01_transcript_11886;F01_transcript_119413;F01_transcript_122093;F01_…
F01_transcript_118705	F01_transcript_100354;F01_transcript_101974;F01_transcript_102310;F01_transcript_102401;F01_transcript_104161;F01_transcript_104568;F01_transcript_104627;F01_transcript_104997;F01_transcript_106204;F01_transcript_106930;F01_transcript_108068;F01_transcript_108318;F01_transcript_111346;F01_transcript_113026;F01_transcript_113198;F01_transcript_113318;F01_transcript_113364;F01_transcript_113730;F01…
F01_transcript_35896	F01_transcript_100011;F01_transcript_120545;F01_transcript_12367;F01_transcript_124149;F01_transcript_125545;F01_transcript_1280;F01_transcript_15095;F01_transcript_18732;F01_transcript_19576;F01_transcript_2535;F01_transcript_33789;F01_transcript_34624;F01_transcript_46854;F01_transcript_51644;F01_transcript_52276;F01_transcript_57470;F01_transcript_70091;F01_transcript_7791;F01_transcript_79857…
F01_transcript_129631	F01_transcript_100304;F01_transcript_100827;F01_transcript_106461;F01_transcript_112536;F01_transcript_114076;F01_transcript_123907;F01_transcript_134665;F01_transcript_136927;F01_transcript_138495;F01_transcript_142505;F01_transcript_144631;F01_transcript_145795;F01_transcript_154295;F01_transcript_155862;F01_transcript_35628;F01_transcript_44913;F01_transcript_54826;F01_transcript_55263;F01_tra…
F01_transcript_56837	F01_transcript_102636;F01_transcript_103871;F01_transcript_104735;F01_transcript_110059;F01_transcript_111105;F01_transcript_11111;F01_transcript_111841;F01_transcript_118395;F01_transcript_121912;F01_transcript_123621;F01_transcript_128214;F01_transcript_130593;F01_transcript_132284;F01_transcript_132828;F01_transcript_139648;F01_transcript_13975;F01_transcript_143541;F01_transcript_143873;F01_t…
F01_transcript_45656	F01_transcript_106641;F01_transcript_12853;F01_transcript_129672;F01_transcript_129856;F01_transcript_135597;F01_transcript_18321;F01_transcript_20873;F01_transcript_24365;F01_transcript_24394;F01_transcript_29739;F01_transcript_34358;F01_transcript_39968;F01_transcript_41778;F01_transcript_42975;F01_transcript_58179;F01_transcript_64346;F01_transcript_70910;F01_transcript_71947;F01_transcript_83…
F01_transcript_121749	F01_transcript_100521;F01_transcript_101827;F01_transcript_102582;F01_transcript_105346;F01_transcript_105415;F01_transcript_105886;F01_transcript_108829;F01_transcript_119208;F01_transcript_120329;F01_transcript_128618;F01_transcript_132292;F01_transcript_134673;F01_transcript_134823;F01_transcript_13639;F01_transcript_141748;F01_transcript_143427;F01_transcript_144161;F01_transcript_144212;F01_…
F01_transcript_89001	F01_transcript_109030;F01_transcript_116949;F01_transcript_117354;F01_transcript_117440;F01_transcript_119130;F01_transcript_119527;F01_transcript_142792;F01_transcript_147648;F01_transcript_150147;F01_transcript_151171;F01_transcript_153446;F01_transcript_55992;F01_transcript_56423;F01_transcript_59149;F01_transcript_68914;F01_transcript_71361;F01_transcript_73684;F01_transcript_74300;F01_transc…
F01_transcript_93131	F01_transcript_42573;F01_transcript_72680;F01_transcript_79947;F01_transcript_85205
F01_transcript_65318	F01_transcript_101081;F01_transcript_101416;F01_transcript_101430;F01_transcript_101592;F01_transcript_101911;F01_transcript_101992;F01_transcript_102527;F01_transcript_104819;F01_transcript_105694;F01_transcript_106261;F01_transcript_106973;F01_transcript_107369;F01_transcript_10766;F01_transcript_108314;F01_transcript_108322;F01_transcript_108843;F01_transcript_109299;F01_transcript_110416;F01_…
F01_transcript_129430	F01_transcript_127574;F01_transcript_41;F01_transcript_85843
F01_transcript_54553	F01_transcript_100333;F01_transcript_101774;F01_transcript_103297;F01_transcript_103424;F01_transcript_103448;F01_transcript_105695;F01_transcript_105816;F01_transcript_112265;F01_transcript_113684;F01_transcript_114287;F01_transcript_123895;F01_transcript_123906;F01_transcript_125421;F01_transcript_128260;F01_transcript_133426;F01_transcript_134247;F01_transcript_140677;F01_transcript_140873;F01…
F01_transcript_152466	F01_transcript_100138;F01_transcript_104592;F01_transcript_10672;F01_transcript_107193;F01_transcript_1073;F01_transcript_108209;F01_transcript_108512;F01_transcript_110086;F01_transcript_113032;F01_transcript_115530;F01_transcript_120343;F01_transcript_121260;F01_transcript_124763;F01_transcript_124976;F01_transcript_126630;F01_transcript_128881;F01_transcript_129556;F01_transcript_130118;F01_tr…
F01_transcript_86228	F01_transcript_113624;F01_transcript_113894;F01_transcript_116189;F01_transcript_125045;F01_transcript_125952;F01_transcript_130050;F01_transcript_130681;F01_transcript_131441;F01_transcript_131902;F01_transcript_132840;F01_transcript_135620;F01_transcript_136166;F01_transcript_152738;F01_transcript_28312;F01_transcript_39241;F01_transcript_41251;F01_transcript_4214;F01_transcript_44160;F01_trans…
F01_transcript_88509	F01_transcript_38124
F01_transcript_131734	F01_transcript_84057
F01_transcript_102664	F01_transcript_103345;F01_transcript_131749;F01_transcript_153271
F01_transcript_82149	F01_transcript_39686;F01_transcript_44015
F01_transcript_48823	F01_transcript_45491
F01_transcript_67454	F01_transcript_100107;F01_transcript_100192;F01_transcript_100342;F01_transcript_100923;F01_transcript_101874;F01_transcript_1040;F01_transcript_104579;F01_transcript_10519;F01_transcript_105411;F01_transcript_105790;F01_transcript_105898;F01_transcript_105974;F01_transcript_106399;F01_transcript_106558;F01_transcript_107559;F01_transcript_107896;F01_transcript_108103;F01_transcript_108646;F01_tr…
F01_transcript_110229	F01_transcript_49281;F01_transcript_51213;F01_transcript_61283;F01_transcript_90948
F01_transcript_33924	F01_transcript_150838
F01_transcript_119654	F01_transcript_110669;F01_transcript_111924;F01_transcript_116849;F01_transcript_117193;F01_transcript_117506;F01_transcript_117861;F01_transcript_120594;F01_transcript_123096;F01_transcript_125033;F01_transcript_125939;F01_transcript_127222;F01_transcript_129118;F01_transcript_131268;F01_transcript_135972;F01_transcript_149128;F01_transcript_151937;F01_transcript_152234;F01_transcript_153414;F01…
F01_transcript_85877	F01_transcript_10060;F01_transcript_101626;F01_transcript_106676;F01_transcript_106681;F01_transcript_106703;F01_transcript_107602;F01_transcript_110318;F01_transcript_110451;F01_transcript_111291;F01_transcript_111505;F01_transcript_112988;F01_transcript_113957;F01_transcript_114283;F01_transcript_116453;F01_transcript_116819;F01_transcript_117298;F01_transcript_117461;F01_transcript_118881;F01_…
F01_transcript_69181	F01_transcript_26366;F01_transcript_91581
F01_transcript_53787	F01_transcript_100397;F01_transcript_100414;F01_transcript_100429;F01_transcript_101081;F01_transcript_101416;F01_transcript_101430;F01_transcript_101592;F01_transcript_101900;F01_transcript_101911;F01_transcript_102341;F01_transcript_102346;F01_transcript_102527;F01_transcript_102555;F01_transcript_103329;F01_transcript_103963;F01_transcript_104773;F01_transcript_104819;F01_transcript_105612;F01…
F01_transcript_79190	F01_transcript_103920;F01_transcript_105286;F01_transcript_106430;F01_transcript_107792;F01_transcript_108583;F01_transcript_110650;F01_transcript_112758;F01_transcript_117783;F01_transcript_11827;F01_transcript_120047;F01_transcript_121774;F01_transcript_123803;F01_transcript_124318;F01_transcript_129424;F01_transcript_134055;F01_transcript_135667;F01_transcript_135756;F01_transcript_141247;F01_…
F01_transcript_147512	F01_transcript_100368;F01_transcript_100521;F01_transcript_101304;F01_transcript_104644;F01_transcript_105346;F01_transcript_105415;F01_transcript_105886;F01_transcript_107306;F01_transcript_108451;F01_transcript_108813;F01_transcript_108829;F01_transcript_112005;F01_transcript_112197;F01_transcript_112597;F01_transcript_114132;F01_transcript_116662;F01_transcript_120329;F01_transcript_122483;F01…
F01_transcript_79773	F01_transcript_103167;F01_transcript_104527;F01_transcript_110059;F01_transcript_112595;F01_transcript_114211;F01_transcript_118395;F01_transcript_121912;F01_transcript_123828;F01_transcript_124981;F01_transcript_127755;F01_transcript_128427;F01_transcript_129375;F01_transcript_135355;F01_transcript_136479;F01_transcript_139441;F01_transcript_140043;F01_transcript_140568;F01_transcript_144517;F01…
F01_transcript_150262	F01_transcript_118659;F01_transcript_56980;F01_transcript_97356
F01_transcript_124561	F01_transcript_100624
F01_transcript_54000	F01_transcript_107897;F01_transcript_121790
F01_transcript_70429	F01_transcript_100357;F01_transcript_101706;F01_transcript_102229;F01_transcript_102420;F01_transcript_104088;F01_transcript_112534;F01_transcript_114455;F01_transcript_114962;F01_transcript_115581;F01_transcript_120114;F01_transcript_125543;F01_transcript_127377;F01_transcript_129191;F01_transcript_129266;F01_transcript_130414;F01_transcript_132239;F01_transcript_133340;F01_transcript_139155;F01…
F01_transcript_41367	F01_transcript_103611;F01_transcript_104439;F01_transcript_122039;F01_transcript_123646;F01_transcript_140326;F01_transcript_152241;F01_transcript_24224;F01_transcript_29828;F01_transcript_32167;F01_transcript_34473;F01_transcript_37780;F01_transcript_40277;F01_transcript_46304;F01_transcript_46854;F01_transcript_59940;F01_transcript_96238
F01_transcript_125101	F01_transcript_101398;F01_transcript_102897;F01_transcript_105801;F01_transcript_106348;F01_transcript_106451;F01_transcript_108532;F01_transcript_109455;F01_transcript_109682;F01_transcript_110170;F01_transcript_110843;F01_transcript_113663;F01_transcript_120575;F01_transcript_120864;F01_transcript_121002;F01_transcript_121008;F01_transcript_122537;F01_transcript_125514;F01_transcript_126077;F01…
F01_transcript_96122	F01_transcript_10313;F01_transcript_109030;F01_transcript_116949;F01_transcript_117354;F01_transcript_117440;F01_transcript_119130;F01_transcript_119527;F01_transcript_133234;F01_transcript_142792;F01_transcript_144791;F01_transcript_147648;F01_transcript_150147;F01_transcript_151171;F01_transcript_153446;F01_transcript_55992;F01_transcript_56423;F01_transcript_59149;F01_transcript_68914;F01_tran…
F01_transcript_103586	F01_transcript_132657
F01_transcript_79362	F01_transcript_120119;F01_transcript_140112;F01_transcript_2004;F01_transcript_63985;F01_transcript_70828
F01_transcript_119423	F01_transcript_101413;F01_transcript_101825;F01_transcript_102532;F01_transcript_102604;F01_transcript_102957;F01_transcript_104294;F01_transcript_105472;F01_transcript_105493;F01_transcript_105594;F01_transcript_108462;F01_transcript_109242;F01_transcript_110005;F01_transcript_114413;F01_transcript_115618;F01_transcript_115898;F01_transcript_116357;F01_transcript_116575;F01_transcript_116984;F01…
F01_transcript_87513	F01_transcript_101264;F01_transcript_101378;F01_transcript_102019;F01_transcript_106053;F01_transcript_11045;F01_transcript_113894;F01_transcript_114674;F01_transcript_116189;F01_transcript_124144;F01_transcript_128421;F01_transcript_131902;F01_transcript_13362;F01_transcript_134904;F01_transcript_150968;F01_transcript_155227;F01_transcript_155345;F01_transcript_21012;F01_transcript_21388;F01_tra…
F01_transcript_145924	F01_transcript_101081;F01_transcript_101416;F01_transcript_101592;F01_transcript_102300;F01_transcript_102346;F01_transcript_102527;F01_transcript_103329;F01_transcript_103963;F01_transcript_104229;F01_transcript_104773;F01_transcript_104819;F01_transcript_105694;F01_transcript_106416;F01_transcript_106973;F01_transcript_107369;F01_transcript_10766;F01_transcript_108314;F01_transcript_108843;F01_…
F01_transcript_73173	F01_transcript_101093;F01_transcript_102423;F01_transcript_103754;F01_transcript_103956;F01_transcript_107448;F01_transcript_107765;F01_transcript_110276;F01_transcript_110439;F01_transcript_113323;F01_transcript_120385;F01_transcript_121716;F01_transcript_130144;F01_transcript_132427;F01_transcript_132998;F01_transcript_135401;F01_transcript_135725;F01_transcript_136614;F01_transcript_138764;F01…
F01_transcript_54061	F01_transcript_155354;F01_transcript_51501
F01_transcript_143419	F01_transcript_106734;F01_transcript_113317;F01_transcript_113468;F01_transcript_115266;F01_transcript_118692;F01_transcript_123151;F01_transcript_138482;F01_transcript_147971;F01_transcript_14820;F01_transcript_155153;F01_transcript_17907;F01_transcript_26452;F01_transcript_27045;F01_transcript_35986;F01_transcript_36551;F01_transcript_36559;F01_transcript_37730;F01_transcript_38844;F01_transcri…
F01_transcript_143645	F01_transcript_105472;F01_transcript_107345;F01_transcript_109796;F01_transcript_117871;F01_transcript_119612;F01_transcript_119990;F01_transcript_121885;F01_transcript_123676;F01_transcript_125215;F01_transcript_127596;F01_transcript_127685;F01_transcript_128489;F01_transcript_130851;F01_transcript_139506;F01_transcript_148372;F01_transcript_150613;F01_transcript_16838;F01_transcript_21965;F01_t…
F01_transcript_68580	F01_transcript_116107;F01_transcript_131902;F01_transcript_14772;F01_transcript_22335;F01_transcript_26115;F01_transcript_27105;F01_transcript_28312;F01_transcript_39241;F01_transcript_41251;F01_transcript_45402;F01_transcript_46963;F01_transcript_48785;F01_transcript_52284;F01_transcript_5516;F01_transcript_63973;F01_transcript_73278;F01_transcript_80763;F01_transcript_94101;F01_transcript_98086…
F01_transcript_148600	F01_transcript_126251;F01_transcript_74710;F01_transcript_78346
F01_transcript_57586	F01_transcript_101458;F01_transcript_106269;F01_transcript_110240;F01_transcript_111319;F01_transcript_118761;F01_transcript_121387;F01_transcript_132385;F01_transcript_133366;F01_transcript_137236;F01_transcript_143356;F01_transcript_144117;F01_transcript_145202;F01_transcript_154245;F01_transcript_20409;F01_transcript_57140;F01_transcript_58844;F01_transcript_64501;F01_transcript_65430;F01_tran…
F01_transcript_115102	F01_transcript_109142;F01_transcript_109621;F01_transcript_113762;F01_transcript_118835;F01_transcript_119911;F01_transcript_121900;F01_transcript_122154;F01_transcript_124048;F01_transcript_125234;F01_transcript_128576;F01_transcript_131234;F01_transcript_135218;F01_transcript_142033;F01_transcript_147148;F01_transcript_152922;F01_transcript_1782;F01_transcript_1972;F01_transcript_58727;F01_tran…
F01_transcript_111347	F01_transcript_118655;F01_transcript_135192;F01_transcript_59628;F01_transcript_77093
F01_transcript_155370	F01_transcript_10865;F01_transcript_109059;F01_transcript_119484;F01_transcript_120650;F01_transcript_123266;F01_transcript_127340;F01_transcript_133552;F01_transcript_143867;F01_transcript_144453;F01_transcript_149302;F01_transcript_16961;F01_transcript_22027;F01_transcript_24811;F01_transcript_252;F01_transcript_30420;F01_transcript_37088;F01_transcript_4924;F01_transcript_58055;F01_transcript_…
F01_transcript_93231	F01_transcript_103150;F01_transcript_103255;F01_transcript_113026;F01_transcript_117575;F01_transcript_123405;F01_transcript_128814;F01_transcript_133845;F01_transcript_135293;F01_transcript_143832;F01_transcript_147621;F01_transcript_26776;F01_transcript_31372;F01_transcript_56579;F01_transcript_59084;F01_transcript_61301;F01_transcript_62254;F01_transcript_68947;F01_transcript_75210;F01_transcr…
F01_transcript_97816	F01_transcript_101208;F01_transcript_112892;F01_transcript_113163;F01_transcript_117565;F01_transcript_117855;F01_transcript_119276;F01_transcript_123126;F01_transcript_127716;F01_transcript_135669;F01_transcript_139808;F01_transcript_141568;F01_transcript_142594;F01_transcript_148987;F01_transcript_152763;F01_transcript_154208;F01_transcript_23097;F01_transcript_27429;F01_transcript_60002;F01_tr…
F01_transcript_79099	F01_transcript_104284;F01_transcript_73861;F01_transcript_80095;F01_transcript_94854;F01_transcript_98856
F01_transcript_131691	F01_transcript_103547;F01_transcript_107269;F01_transcript_113531;F01_transcript_114693;F01_transcript_134882;F01_transcript_142130;F01_transcript_17133;F01_transcript_23717;F01_transcript_26685;F01_transcript_33186;F01_transcript_35450;F01_transcript_49596;F01_transcript_70553
F01_transcript_69505	F01_transcript_102423;F01_transcript_103754;F01_transcript_107448;F01_transcript_109407;F01_transcript_110439;F01_transcript_113323;F01_transcript_120385;F01_transcript_121716;F01_transcript_130144;F01_transcript_132427;F01_transcript_132998;F01_transcript_135725;F01_transcript_136614;F01_transcript_138764;F01_transcript_139778;F01_transcript_144966;F01_transcript_145411;F01_transcript_148780;F01…
F01_transcript_137068	F01_transcript_102910;F01_transcript_102957;F01_transcript_103184;F01_transcript_104078;F01_transcript_105128;F01_transcript_105334;F01_transcript_106020;F01_transcript_106404;F01_transcript_106556;F01_transcript_10859;F01_transcript_108876;F01_transcript_109027;F01_transcript_109278;F01_transcript_109411;F01_transcript_111914;F01_transcript_112179;F01_transcript_112387;F01_transcript_113317;F01_…
F01_transcript_61330	F01_transcript_102017;F01_transcript_106625;F01_transcript_107438;F01_transcript_115752;F01_transcript_118937;F01_transcript_120686;F01_transcript_121002;F01_transcript_121338;F01_transcript_126882;F01_transcript_127355;F01_transcript_130534;F01_transcript_130694;F01_transcript_131113;F01_transcript_132351;F01_transcript_134090;F01_transcript_141148;F01_transcript_146278;F01_transcript_146340;F01…
F01_transcript_105911	F01_transcript_135377;F01_transcript_152403;F01_transcript_31873;F01_transcript_33179;F01_transcript_80368;F01_transcript_85956
F01_transcript_108194	F01_transcript_100414;F01_transcript_101592;F01_transcript_101900;F01_transcript_102951;F01_transcript_103730;F01_transcript_103963;F01_transcript_104773;F01_transcript_105612;F01_transcript_105747;F01_transcript_106060;F01_transcript_106416;F01_transcript_107962;F01_transcript_108314;F01_transcript_108843;F01_transcript_111117;F01_transcript_111548;F01_transcript_111699;F01_transcript_112852;F01…
F01_transcript_130633	F01_transcript_102627;F01_transcript_103220;F01_transcript_105853;F01_transcript_108407;F01_transcript_109807;F01_transcript_110658;F01_transcript_112703;F01_transcript_115534;F01_transcript_123182;F01_transcript_124822;F01_transcript_125614;F01_transcript_129348;F01_transcript_131002;F01_transcript_132858;F01_transcript_142714;F01_transcript_143639;F01_transcript_145064;F01_transcript_145271;F01…
F01_transcript_125416	F01_transcript_104527;F01_transcript_104982;F01_transcript_110059;F01_transcript_114211;F01_transcript_124981;F01_transcript_129271;F01_transcript_129375;F01_transcript_135461;F01_transcript_13975;F01_transcript_140568;F01_transcript_144517;F01_transcript_149953;F01_transcript_152989;F01_transcript_153767;F01_transcript_25454;F01_transcript_40798;F01_transcript_42957;F01_transcript_47656;F01_tran…
F01_transcript_85700	F01_transcript_143518;F01_transcript_148317;F01_transcript_74727;F01_transcript_85355
F01_transcript_66678	F01_transcript_131488;F01_transcript_99527
F01_transcript_76247	F01_transcript_105472;F01_transcript_105493;F01_transcript_106053;F01_transcript_106810;F01_transcript_107013;F01_transcript_107345;F01_transcript_107893;F01_transcript_108462;F01_transcript_110005;F01_transcript_110293;F01_transcript_112075;F01_transcript_113894;F01_transcript_116357;F01_transcript_116501;F01_transcript_116984;F01_transcript_117371;F01_transcript_119620;F01_transcript_119990;F01…
F01_transcript_127713	F01_transcript_106250;F01_transcript_109750;F01_transcript_117992;F01_transcript_123089;F01_transcript_133641;F01_transcript_139962;F01_transcript_140439;F01_transcript_14296;F01_transcript_151521;F01_transcript_153786;F01_transcript_37540;F01_transcript_38423;F01_transcript_54882;F01_transcript_59022;F01_transcript_65754;F01_transcript_65860;F01_transcript_66762;F01_transcript_71118;F01_transcri…
F01_transcript_124737	F01_transcript_100250;F01_transcript_101050;F01_transcript_105023;F01_transcript_106001;F01_transcript_106295;F01_transcript_119739;F01_transcript_124115;F01_transcript_126444;F01_transcript_127268;F01_transcript_127551;F01_transcript_142879;F01_transcript_144081;F01_transcript_16946;F01_transcript_19695;F01_transcript_2823;F01_transcript_62237;F01_transcript_64481;F01_transcript_64970;F01_transc…
F01_transcript_70059	F01_transcript_100304;F01_transcript_100863;F01_transcript_100969;F01_transcript_101394;F01_transcript_103106;F01_transcript_105061;F01_transcript_107003;F01_transcript_107246;F01_transcript_108610;F01_transcript_109400;F01_transcript_110594;F01_transcript_110965;F01_transcript_111740;F01_transcript_11187;F01_transcript_11201;F01_transcript_112169;F01_transcript_115344;F01_transcript_115372;F01_t…
F01_transcript_84682	F01_transcript_98700
F01_transcript_132641	F01_transcript_126218
F01_transcript_147765	F01_transcript_101631;F01_transcript_103818;F01_transcript_104405;F01_transcript_106461;F01_transcript_107530;F01_transcript_11098;F01_transcript_113471;F01_transcript_114300;F01_transcript_116306;F01_transcript_117976;F01_transcript_123280;F01_transcript_123591;F01_transcript_127598;F01_transcript_128701;F01_transcript_129700;F01_transcript_133573;F01_transcript_134572;F01_transcript_135619;F01_…
F01_transcript_87370	F01_transcript_102578;F01_transcript_128618;F01_transcript_141364;F01_transcript_143443;F01_transcript_148725;F01_transcript_52427;F01_transcript_5801;F01_transcript_72626;F01_transcript_9742
F01_transcript_135916	F01_transcript_104769;F01_transcript_118704;F01_transcript_122916;F01_transcript_129125;F01_transcript_130961;F01_transcript_132145;F01_transcript_142415;F01_transcript_144372;F01_transcript_145219;F01_transcript_146490;F01_transcript_152881;F01_transcript_153761;F01_transcript_62874;F01_transcript_64081;F01_transcript_66982;F01_transcript_68135;F01_transcript_69603;F01_transcript_71715;F01_trans…
F01_transcript_110088	F01_transcript_100357;F01_transcript_101706;F01_transcript_102229;F01_transcript_102420;F01_transcript_104088;F01_transcript_109743;F01_transcript_112534;F01_transcript_114455;F01_transcript_114962;F01_transcript_115581;F01_transcript_119637;F01_transcript_120114;F01_transcript_121790;F01_transcript_125543;F01_transcript_127377;F01_transcript_129191;F01_transcript_129266;F01_transcript_130414;F01…
F01_transcript_153164	F01_transcript_101544;F01_transcript_101631;F01_transcript_101646;F01_transcript_102191;F01_transcript_104035;F01_transcript_104405;F01_transcript_104561;F01_transcript_104642;F01_transcript_107014;F01_transcript_107179;F01_transcript_107530;F01_transcript_108411;F01_transcript_109036;F01_transcript_109293;F01_transcript_109719;F01_transcript_109984;F01_transcript_111723;F01_transcript_111945;F01…
F01_transcript_118783	F01_transcript_102323;F01_transcript_123827;F01_transcript_137649;F01_transcript_48165;F01_transcript_57585;F01_transcript_76626;F01_transcript_83898;F01_transcript_90093
F01_transcript_128381	F01_transcript_101079;F01_transcript_102636;F01_transcript_103167;F01_transcript_103441;F01_transcript_104527;F01_transcript_104735;F01_transcript_104775;F01_transcript_107139;F01_transcript_107949;F01_transcript_109674;F01_transcript_110059;F01_transcript_110667;F01_transcript_111105;F01_transcript_11111;F01_transcript_111142;F01_transcript_111841;F01_transcript_112595;F01_transcript_113570;F01_…
F01_transcript_54155	F01_transcript_101413;F01_transcript_101783;F01_transcript_102532;F01_transcript_102659;F01_transcript_102957;F01_transcript_103375;F01_transcript_103417;F01_transcript_103760;F01_transcript_104274;F01_transcript_104449;F01_transcript_104459;F01_transcript_105493;F01_transcript_105594;F01_transcript_105757;F01_transcript_105929;F01_transcript_106274;F01_transcript_10656;F01_transcript_106810;F01_…
F01_transcript_57605	F01_transcript_135175
F01_transcript_154695	F01_transcript_144372;F01_transcript_42955;F01_transcript_62207;F01_transcript_66699;F01_transcript_68792;F01_transcript_73662
F01_transcript_148625	F01_transcript_1234;F01_transcript_123803;F01_transcript_124367;F01_transcript_135494;F01_transcript_149451;F01_transcript_64560
F01_transcript_52396	F01_transcript_100847;F01_transcript_111291;F01_transcript_112130;F01_transcript_113957;F01_transcript_114283;F01_transcript_125342;F01_transcript_126409;F01_transcript_126882;F01_transcript_130833;F01_transcript_135538;F01_transcript_143075;F01_transcript_143232;F01_transcript_15866;F01_transcript_17095;F01_transcript_25731;F01_transcript_29728;F01_transcript_32387;F01_transcript_39302;F01_trans…
F01_transcript_124026	F01_transcript_100969;F01_transcript_101394;F01_transcript_109523;F01_transcript_110594;F01_transcript_112169;F01_transcript_112416;F01_transcript_113292;F01_transcript_115372;F01_transcript_116847;F01_transcript_126178;F01_transcript_131274;F01_transcript_136133;F01_transcript_139982;F01_transcript_141537;F01_transcript_143593;F01_transcript_144930;F01_transcript_146594;F01_transcript_147822;F01…
F01_transcript_150746	F01_transcript_101458;F01_transcript_106269;F01_transcript_110240;F01_transcript_111319;F01_transcript_118761;F01_transcript_121387;F01_transcript_132385;F01_transcript_133366;F01_transcript_137236;F01_transcript_143356;F01_transcript_144117;F01_transcript_145202;F01_transcript_154245;F01_transcript_20409;F01_transcript_57140;F01_transcript_58844;F01_transcript_64501;F01_transcript_65430;F01_tran…
F01_transcript_124830	F01_transcript_109500;F01_transcript_11820;F01_transcript_135544;F01_transcript_55805;F01_transcript_63973;F01_transcript_7257;F01_transcript_96159
F01_transcript_137907	F01_transcript_128032;F01_transcript_132278;F01_transcript_137108;F01_transcript_18070;F01_transcript_72008
F01_transcript_54790	F01_transcript_104644;F01_transcript_107306;F01_transcript_108451;F01_transcript_140351;F01_transcript_140810;F01_transcript_151543;F01_transcript_154539;F01_transcript_155049;F01_transcript_77469;F01_transcript_81367;F01_transcript_96210;F01_transcript_98447
F01_transcript_139321	F01_transcript_154216;F01_transcript_71634;F01_transcript_89474
F01_transcript_61391	F01_transcript_101544;F01_transcript_101631;F01_transcript_101646;F01_transcript_102191;F01_transcript_104035;F01_transcript_104405;F01_transcript_104561;F01_transcript_104642;F01_transcript_107014;F01_transcript_107179;F01_transcript_107530;F01_transcript_108411;F01_transcript_109036;F01_transcript_109293;F01_transcript_109719;F01_transcript_109984;F01_transcript_111723;F01_transcript_111945;F01…
F01_transcript_134835	F01_transcript_142411
F01_transcript_96394	F01_transcript_100177;F01_transcript_100304;F01_transcript_100895;F01_transcript_102162;F01_transcript_103215;F01_transcript_103263;F01_transcript_105118;F01_transcript_106473;F01_transcript_107003;F01_transcript_107046;F01_transcript_108056;F01_transcript_11098;F01_transcript_112536;F01_transcript_114703;F01_transcript_115052;F01_transcript_115079;F01_transcript_116411;F01_transcript_116450;F01_…
F01_transcript_75933	F01_transcript_101057;F01_transcript_151555
F01_transcript_77676	F01_transcript_101125;F01_transcript_106651;F01_transcript_106828;F01_transcript_109201;F01_transcript_125188;F01_transcript_125303;F01_transcript_125492;F01_transcript_126651;F01_transcript_128505;F01_transcript_134143;F01_transcript_134298;F01_transcript_134669;F01_transcript_137681;F01_transcript_140148;F01_transcript_141304;F01_transcript_149625;F01_transcript_152217;F01_transcript_153348;F01…
F01_transcript_54895	F01_transcript_121354;F01_transcript_152050
F01_transcript_75398	F01_transcript_153800;F01_transcript_87688;F01_transcript_94407;F01_transcript_94891
F01_transcript_137110	F01_transcript_109600;F01_transcript_130430;F01_transcript_141363;F01_transcript_76472;F01_transcript_89029
F01_transcript_132466	F01_transcript_129571;F01_transcript_15447;F01_transcript_155511;F01_transcript_27574;F01_transcript_29425;F01_transcript_33398;F01_transcript_37823;F01_transcript_58513;F01_transcript_89849;F01_transcript_94574;F01_transcript_97447
F01_transcript_119699	F01_transcript_103444;F01_transcript_103854;F01_transcript_103895;F01_transcript_104313;F01_transcript_105617;F01_transcript_111068;F01_transcript_114438;F01_transcript_116218;F01_transcript_117021;F01_transcript_119350;F01_transcript_126560;F01_transcript_126744;F01_transcript_128502;F01_transcript_130755;F01_transcript_133086;F01_transcript_141395;F01_transcript_142430;F01_transcript_145749;F01…
F01_transcript_142494	F01_transcript_93936
F01_transcript_60860	F01_transcript_100982;F01_transcript_102707;F01_transcript_104805;F01_transcript_105674;F01_transcript_106635;F01_transcript_109878;F01_transcript_110138;F01_transcript_112749;F01_transcript_116487;F01_transcript_117077;F01_transcript_118268;F01_transcript_121960;F01_transcript_122323;F01_transcript_123959;F01_transcript_126884;F01_transcript_131541;F01_transcript_131967;F01_transcript_132215;F01…
F01_transcript_76245	F01_transcript_77228
F01_transcript_95650	F01_transcript_119595;F01_transcript_140187;F01_transcript_150219;F01_transcript_26285;F01_transcript_39988;F01_transcript_78410
F01_transcript_53446	F01_transcript_100192;F01_transcript_105974;F01_transcript_106096;F01_transcript_112666;F01_transcript_112772;F01_transcript_115103;F01_transcript_115571;F01_transcript_117678;F01_transcript_118490;F01_transcript_125545;F01_transcript_126310;F01_transcript_126920;F01_transcript_128650;F01_transcript_129243;F01_transcript_129293;F01_transcript_130891;F01_transcript_138327;F01_transcript_141807;F01…
F01_transcript_129066	F01_transcript_142987;F01_transcript_3947
F01_transcript_53480	F01_transcript_100479;F01_transcript_101201;F01_transcript_108098;F01_transcript_110250;F01_transcript_110930;F01_transcript_111316;F01_transcript_114859;F01_transcript_115184;F01_transcript_115807;F01_transcript_117700;F01_transcript_120084;F01_transcript_120294;F01_transcript_122387;F01_transcript_123218;F01_transcript_123800;F01_transcript_124854;F01_transcript_126251;F01_transcript_128237;F01…
F01_transcript_98384	F01_transcript_143982;F01_transcript_2074
F01_transcript_121051	F01_transcript_102627;F01_transcript_103220;F01_transcript_105853;F01_transcript_108407;F01_transcript_109807;F01_transcript_110658;F01_transcript_112703;F01_transcript_115534;F01_transcript_123182;F01_transcript_124822;F01_transcript_125614;F01_transcript_129348;F01_transcript_131002;F01_transcript_132858;F01_transcript_142714;F01_transcript_143639;F01_transcript_145064;F01_transcript_145271;F01…
F01_transcript_143429	F01_transcript_10128;F01_transcript_106660;F01_transcript_116167;F01_transcript_125023;F01_transcript_126701;F01_transcript_133955;F01_transcript_155237;F01_transcript_18206;F01_transcript_23048;F01_transcript_28572;F01_transcript_32812;F01_transcript_32937;F01_transcript_34553;F01_transcript_35096;F01_transcript_41549;F01_transcript_4193;F01_transcript_44125;F01_transcript_58118;F01_transcript_6…
F01_transcript_136167	F01_transcript_101338;F01_transcript_105740;F01_transcript_106736;F01_transcript_112087;F01_transcript_112144;F01_transcript_113955;F01_transcript_116869;F01_transcript_119116;F01_transcript_122379;F01_transcript_125134;F01_transcript_127054;F01_transcript_130812;F01_transcript_131037;F01_transcript_133716;F01_transcript_134391;F01_transcript_136128;F01_transcript_136536;F01_transcript_137988;F01…
F01_transcript_111139	F01_transcript_107488;F01_transcript_107813;F01_transcript_108500;F01_transcript_110328;F01_transcript_111062;F01_transcript_111138;F01_transcript_113822;F01_transcript_114188;F01_transcript_115647;F01_transcript_116250;F01_transcript_120682;F01_transcript_120830;F01_transcript_124101;F01_transcript_124638;F01_transcript_125540;F01_transcript_127341;F01_transcript_131035;F01_transcript_131282;F01…
F01_transcript_145805	F01_transcript_10060;F01_transcript_103173;F01_transcript_107602;F01_transcript_123409;F01_transcript_128967;F01_transcript_129846;F01_transcript_131811;F01_transcript_133044;F01_transcript_134336;F01_transcript_135664;F01_transcript_135688;F01_transcript_143535;F01_transcript_145459;F01_transcript_147038;F01_transcript_150357;F01_transcript_150680;F01_transcript_156065;F01_transcript_15890;F01_t…
F01_transcript_52027	F01_transcript_104131;F01_transcript_105261;F01_transcript_107751;F01_transcript_109411;F01_transcript_110239;F01_transcript_115151;F01_transcript_116273;F01_transcript_117540;F01_transcript_119232;F01_transcript_122988;F01_transcript_123861;F01_transcript_126402;F01_transcript_127324;F01_transcript_127801;F01_transcript_130500;F01_transcript_135359;F01_transcript_138413;F01_transcript_141317;F01…
F01_transcript_97306	F01_transcript_137676
F01_transcript_45505	F01_transcript_10707;F01_transcript_10865;F01_transcript_114326;F01_transcript_116354;F01_transcript_116468;F01_transcript_116720;F01_transcript_123744;F01_transcript_125379;F01_transcript_130076;F01_transcript_130662;F01_transcript_134531;F01_transcript_136435;F01_transcript_140326;F01_transcript_140870;F01_transcript_144453;F01_transcript_149302;F01_transcript_154164;F01_transcript_155739;F01_t…
F01_transcript_102349	F01_transcript_100908;F01_transcript_101398;F01_transcript_105801;F01_transcript_106348;F01_transcript_109455;F01_transcript_111629;F01_transcript_112970;F01_transcript_113663;F01_transcript_119317;F01_transcript_120864;F01_transcript_122537;F01_transcript_122705;F01_transcript_124679;F01_transcript_125514;F01_transcript_12940;F01_transcript_130055;F01_transcript_136452;F01_transcript_136459;F01_…
F01_transcript_112120	F01_transcript_145244;F01_transcript_4468
F01_transcript_77656	F01_transcript_115171;F01_transcript_125831;F01_transcript_3330;F01_transcript_48087;F01_transcript_52295;F01_transcript_96037
F01_transcript_98073	F01_transcript_68532
F01_transcript_88622	F01_transcript_100250;F01_transcript_102598;F01_transcript_102690;F01_transcript_105023;F01_transcript_106001;F01_transcript_106295;F01_transcript_106570;F01_transcript_109683;F01_transcript_111234;F01_transcript_119739;F01_transcript_124115;F01_transcript_126444;F01_transcript_127268;F01_transcript_127551;F01_transcript_128122;F01_transcript_128205;F01_transcript_13867;F01_transcript_139780;F01_…
F01_transcript_48471	F01_transcript_100192;F01_transcript_105409;F01_transcript_105974;F01_transcript_109897;F01_transcript_110026;F01_transcript_112666;F01_transcript_115103;F01_transcript_116515;F01_transcript_117678;F01_transcript_118490;F01_transcript_11937;F01_transcript_12496;F01_transcript_125545;F01_transcript_126920;F01_transcript_128650;F01_transcript_129293;F01_transcript_13084;F01_transcript_131705;F01_tr…
F01_transcript_113848	F01_transcript_101149;F01_transcript_101784;F01_transcript_105260;F01_transcript_107424;F01_transcript_109272;F01_transcript_111557;F01_transcript_113609;F01_transcript_114489;F01_transcript_119835;F01_transcript_125307;F01_transcript_125882;F01_transcript_126846;F01_transcript_128802;F01_transcript_130581;F01_transcript_13430;F01_transcript_134706;F01_transcript_138280;F01_transcript_148713;F01_…
F01_transcript_69691	F01_transcript_87767
F01_transcript_103128	F01_transcript_107481;F01_transcript_115812;F01_transcript_118874;F01_transcript_134055;F01_transcript_152511;F01_transcript_1623;F01_transcript_1678;F01_transcript_2263;F01_transcript_32;F01_transcript_3379;F01_transcript_3842;F01_transcript_57477;F01_transcript_65200;F01_transcript_69193;F01_transcript_72897;F01_transcript_76819;F01_transcript_78548;F01_transcript_84534;F01_transcript_88196;F01…
F01_transcript_140961	F01_transcript_115324
F01_transcript_94809	F01_transcript_108280;F01_transcript_40726;F01_transcript_56672
F01_transcript_132646	F01_transcript_100354;F01_transcript_101974;F01_transcript_102310;F01_transcript_102401;F01_transcript_104161;F01_transcript_104568;F01_transcript_104627;F01_transcript_104997;F01_transcript_106930;F01_transcript_108068;F01_transcript_108318;F01_transcript_111346;F01_transcript_113026;F01_transcript_113198;F01_transcript_113318;F01_transcript_113364;F01_transcript_113730;F01_transcript_113741;F01…
F01_transcript_52263	F01_transcript_10060;F01_transcript_101626;F01_transcript_106703;F01_transcript_107602;F01_transcript_116174;F01_transcript_116819;F01_transcript_118930;F01_transcript_119422;F01_transcript_128974;F01_transcript_13409;F01_transcript_140055;F01_transcript_141780;F01_transcript_143487;F01_transcript_14453;F01_transcript_14866;F01_transcript_154994;F01_transcript_155484;F01_transcript_17576;F01_tran…
F01_transcript_63709	F01_transcript_100192;F01_transcript_105409;F01_transcript_105974;F01_transcript_109032;F01_transcript_109897;F01_transcript_110026;F01_transcript_112666;F01_transcript_112772;F01_transcript_114708;F01_transcript_115432;F01_transcript_117678;F01_transcript_118151;F01_transcript_118490;F01_transcript_120263;F01_transcript_12496;F01_transcript_125545;F01_transcript_126268;F01_transcript_126920;F01_…
F01_transcript_105505	F01_transcript_106365;F01_transcript_112190;F01_transcript_115896;F01_transcript_138738;F01_transcript_147726;F01_transcript_147933;F01_transcript_149545;F01_transcript_35284;F01_transcript_39678;F01_transcript_40746;F01_transcript_41698;F01_transcript_46486;F01_transcript_47020;F01_transcript_48310;F01_transcript_6262;F01_transcript_73455;F01_transcript_76507;F01_transcript_77887;F01_transcript_…
F01_transcript_104595	F01_transcript_100107;F01_transcript_100342;F01_transcript_100863;F01_transcript_100969;F01_transcript_101568;F01_transcript_101874;F01_transcript_101936;F01_transcript_102437;F01_transcript_102678;F01_transcript_102715;F01_transcript_103221;F01_transcript_103525;F01_transcript_104502;F01_transcript_104776;F01_transcript_105039;F01_transcript_105112;F01_transcript_105151;F01_transcript_105212;F01…
F01_transcript_101231	F01_transcript_127278;F01_transcript_6476;F01_transcript_71230;F01_transcript_89606
F01_transcript_134954	F01_transcript_105772;F01_transcript_106109;F01_transcript_109521;F01_transcript_110333;F01_transcript_11222;F01_transcript_113914;F01_transcript_119484;F01_transcript_127602;F01_transcript_129168;F01_transcript_130846;F01_transcript_134531;F01_transcript_141806;F01_transcript_148599;F01_transcript_153296;F01_transcript_18381;F01_transcript_22543;F01_transcript_24811;F01_transcript_25096;F01_tran…
F01_transcript_149444	F01_transcript_37348;F01_transcript_74830;F01_transcript_98295
F01_transcript_123511	F01_transcript_71611
F01_transcript_68175	F01_transcript_101974;F01_transcript_102401;F01_transcript_104568;F01_transcript_106204;F01_transcript_106930;F01_transcript_108068;F01_transcript_108318;F01_transcript_113198;F01_transcript_113318;F01_transcript_113364;F01_transcript_113741;F01_transcript_113938;F01_transcript_114098;F01_transcript_114415;F01_transcript_114817;F01_transcript_115188;F01_transcript_115233;F01_transcript_115764;F01…
F01_transcript_102904	F01_transcript_103375;F01_transcript_108138;F01_transcript_12406;F01_transcript_126533;F01_transcript_140556;F01_transcript_1422;F01_transcript_142364;F01_transcript_143889;F01_transcript_147835;F01_transcript_150985;F01_transcript_153183;F01_transcript_16173;F01_transcript_1796;F01_transcript_2192;F01_transcript_23254;F01_transcript_2989;F01_transcript_31569;F01_transcript_3588;F01_transcript_40…
F01_transcript_80836	F01_transcript_101889;F01_transcript_11602;F01_transcript_122462;F01_transcript_144581;F01_transcript_148470;F01_transcript_19376;F01_transcript_28979;F01_transcript_35792;F01_transcript_42489;F01_transcript_46571;F01_transcript_89180;F01_transcript_91109;F01_transcript_93423
F01_transcript_121925	F01_transcript_119969;F01_transcript_135117;F01_transcript_71177
F01_transcript_90988	F01_transcript_129125;F01_transcript_130961;F01_transcript_146490;F01_transcript_62874;F01_transcript_65993
F01_transcript_106537	F01_transcript_149271
F01_transcript_61902	F01_transcript_101583;F01_transcript_105440;F01_transcript_108277;F01_transcript_109356;F01_transcript_109392;F01_transcript_109702;F01_transcript_113850;F01_transcript_114344;F01_transcript_115179;F01_transcript_116813;F01_transcript_117889;F01_transcript_118922;F01_transcript_122506;F01_transcript_122723;F01_transcript_123318;F01_transcript_123536;F01_transcript_124775;F01_transcript_127128;F01…
F01_transcript_74860	F01_transcript_100177;F01_transcript_100269;F01_transcript_100304;F01_transcript_102162;F01_transcript_102245;F01_transcript_103215;F01_transcript_103263;F01_transcript_103719;F01_transcript_103983;F01_transcript_104893;F01_transcript_105118;F01_transcript_106473;F01_transcript_106584;F01_transcript_107003;F01_transcript_108533;F01_transcript_109116;F01_transcript_109681;F01_transcript_110066;F01…
F01_transcript_155881	F01_transcript_100486;F01_transcript_149207;F01_transcript_32
F01_transcript_60217	F01_transcript_80877
F01_transcript_113530	F01_transcript_69405
F01_transcript_107884	F01_transcript_101581;F01_transcript_115205;F01_transcript_82251;F01_transcript_83706
F01_transcript_57526	F01_transcript_51154;F01_transcript_70685
F01_transcript_93577	F01_transcript_101413;F01_transcript_101753;F01_transcript_101783;F01_transcript_102291;F01_transcript_10245;F01_transcript_102532;F01_transcript_102659;F01_transcript_102957;F01_transcript_10302;F01_transcript_103760;F01_transcript_104148;F01_transcript_104274;F01_transcript_105015;F01_transcript_105472;F01_transcript_105493;F01_transcript_105594;F01_transcript_105757;F01_transcript_105844;F01_t…
F01_transcript_95015	F01_transcript_107074;F01_transcript_127923
F01_transcript_84664	F01_transcript_97025
F01_transcript_98596	F01_transcript_107438;F01_transcript_118937;F01_transcript_73918;F01_transcript_78565
F01_transcript_56926	F01_transcript_146812;F01_transcript_45029;F01_transcript_55316;F01_transcript_61545
F01_transcript_93983	F01_transcript_107488;F01_transcript_107813;F01_transcript_108500;F01_transcript_110328;F01_transcript_111062;F01_transcript_113822;F01_transcript_114188;F01_transcript_114331;F01_transcript_116250;F01_transcript_120682;F01_transcript_120830;F01_transcript_124101;F01_transcript_124638;F01_transcript_125540;F01_transcript_127341;F01_transcript_131035;F01_transcript_131282;F01_transcript_132978;F01…
F01_transcript_55152	F01_transcript_117382
F01_transcript_125734	F01_transcript_93390;F01_transcript_96432
F01_transcript_150022	F01_transcript_122142
F01_transcript_150696	F01_transcript_100446;F01_transcript_103708;F01_transcript_111094;F01_transcript_115812;F01_transcript_128836;F01_transcript_129267;F01_transcript_130892;F01_transcript_134055;F01_transcript_135794;F01_transcript_143121;F01_transcript_147249;F01_transcript_152511;F01_transcript_154799;F01_transcript_2263;F01_transcript_25154;F01_transcript_30227;F01_transcript_3561;F01_transcript_54978;F01_transc…
F01_transcript_108697	F01_transcript_106428;F01_transcript_108325;F01_transcript_119348;F01_transcript_13211;F01_transcript_14086;F01_transcript_153144;F01_transcript_153317;F01_transcript_156088;F01_transcript_16800;F01_transcript_21436;F01_transcript_27665;F01_transcript_37496;F01_transcript_40107;F01_transcript_7743;F01_transcript_81382;F01_transcript_85443
F01_transcript_97657	F01_transcript_109400;F01_transcript_110594;F01_transcript_114229;F01_transcript_114313;F01_transcript_142275;F01_transcript_143135;F01_transcript_146239;F01_transcript_154336;F01_transcript_26972;F01_transcript_36886;F01_transcript_40962;F01_transcript_57188;F01_transcript_57385;F01_transcript_58716;F01_transcript_70732;F01_transcript_73622;F01_transcript_77868;F01_transcript_86358;F01_transcrip…
F01_transcript_129269	F01_transcript_104226;F01_transcript_122602;F01_transcript_132349;F01_transcript_132445;F01_transcript_139356;F01_transcript_18925;F01_transcript_19138;F01_transcript_20041;F01_transcript_25887;F01_transcript_26970;F01_transcript_27285;F01_transcript_28577;F01_transcript_31179;F01_transcript_32682;F01_transcript_33052;F01_transcript_45181;F01_transcript_4705;F01_transcript_61480;F01_transcript_64…
F01_transcript_51260	F01_transcript_156333;F01_transcript_63328
F01_transcript_144528	F01_transcript_101149;F01_transcript_101784;F01_transcript_105260;F01_transcript_107424;F01_transcript_109272;F01_transcript_111557;F01_transcript_113609;F01_transcript_114489;F01_transcript_119835;F01_transcript_125307;F01_transcript_125882;F01_transcript_126846;F01_transcript_128802;F01_transcript_130581;F01_transcript_13430;F01_transcript_134706;F01_transcript_138280;F01_transcript_148713;F01_…
F01_transcript_61318	F01_transcript_63263
F01_transcript_150565	F01_transcript_101666;F01_transcript_102694;F01_transcript_104872;F01_transcript_107442;F01_transcript_114721;F01_transcript_121071;F01_transcript_131556;F01_transcript_138977;F01_transcript_145410;F01_transcript_18421;F01_transcript_18519;F01_transcript_23048;F01_transcript_40033;F01_transcript_42695;F01_transcript_55606;F01_transcript_58381;F01_transcript_62355;F01_transcript_63118;F01_transcri…
F01_transcript_153696	F01_transcript_10112;F01_transcript_102127;F01_transcript_103447;F01_transcript_105699;F01_transcript_110641;F01_transcript_111120;F01_transcript_111733;F01_transcript_112047;F01_transcript_113914;F01_transcript_114940;F01_transcript_11540;F01_transcript_12091;F01_transcript_123266;F01_transcript_126425;F01_transcript_129175;F01_transcript_1322;F01_transcript_132716;F01_transcript_134098;F01_tran…
F01_transcript_138558	F01_transcript_110647;F01_transcript_111304;F01_transcript_112425;F01_transcript_113570;F01_transcript_116335;F01_transcript_118804;F01_transcript_119317;F01_transcript_131786;F01_transcript_143947;F01_transcript_149935;F01_transcript_153767;F01_transcript_22521;F01_transcript_23754;F01_transcript_25014;F01_transcript_33836;F01_transcript_47725;F01_transcript_51215;F01_transcript_55782;F01_transc…
F01_transcript_64606	F01_transcript_110250;F01_transcript_110930;F01_transcript_111316;F01_transcript_115184;F01_transcript_117700;F01_transcript_120294;F01_transcript_122387;F01_transcript_123218;F01_transcript_123800;F01_transcript_124854;F01_transcript_128237;F01_transcript_130366;F01_transcript_131492;F01_transcript_137136;F01_transcript_138518;F01_transcript_138701;F01_transcript_141401;F01_transcript_142305;F01…
F01_transcript_61135	F01_transcript_102627;F01_transcript_103220;F01_transcript_105853;F01_transcript_108407;F01_transcript_109807;F01_transcript_110658;F01_transcript_112703;F01_transcript_115534;F01_transcript_123182;F01_transcript_124822;F01_transcript_125614;F01_transcript_129348;F01_transcript_131002;F01_transcript_132858;F01_transcript_142714;F01_transcript_143639;F01_transcript_145064;F01_transcript_145271;F01…
F01_transcript_54534	F01_transcript_73589
F01_transcript_107619	F01_transcript_100432;F01_transcript_105795;F01_transcript_106159;F01_transcript_107186;F01_transcript_115005;F01_transcript_117257;F01_transcript_120632;F01_transcript_124197;F01_transcript_124362;F01_transcript_125353;F01_transcript_126302;F01_transcript_129082;F01_transcript_133072;F01_transcript_135640;F01_transcript_13582;F01_transcript_142819;F01_transcript_145478;F01_transcript_145894;F01_…
F01_transcript_125701	F01_transcript_34710
F01_transcript_27593	F01_transcript_115508;F01_transcript_116279;F01_transcript_119741;F01_transcript_120827;F01_transcript_125970;F01_transcript_14287;F01_transcript_149632;F01_transcript_21162;F01_transcript_28840;F01_transcript_34553;F01_transcript_38447;F01_transcript_63050;F01_transcript_66256;F01_transcript_78914;F01_transcript_82143
F01_transcript_53783	F01_transcript_43215
F01_transcript_51571	F01_transcript_102792;F01_transcript_104294;F01_transcript_105472;F01_transcript_107460;F01_transcript_113396;F01_transcript_117867;F01_transcript_119990;F01_transcript_121885;F01_transcript_122691;F01_transcript_127688;F01_transcript_134444;F01_transcript_13681;F01_transcript_142955;F01_transcript_148372;F01_transcript_151745;F01_transcript_152160;F01_transcript_155458;F01_transcript_35062;F01_t…
F01_transcript_127390	F01_transcript_127074;F01_transcript_131117;F01_transcript_137961;F01_transcript_153240;F01_transcript_46012;F01_transcript_56639;F01_transcript_74779
F01_transcript_149980	F01_transcript_56493
F01_transcript_51772	F01_transcript_47703;F01_transcript_52322
F01_transcript_54520	F01_transcript_103444;F01_transcript_103854;F01_transcript_103895;F01_transcript_104313;F01_transcript_105617;F01_transcript_111068;F01_transcript_114438;F01_transcript_116218;F01_transcript_117021;F01_transcript_119350;F01_transcript_126560;F01_transcript_126744;F01_transcript_128502;F01_transcript_130755;F01_transcript_133086;F01_transcript_141395;F01_transcript_142430;F01_transcript_145749;F01…
F01_transcript_142532	F01_transcript_110878;F01_transcript_111214;F01_transcript_118588;F01_transcript_119414;F01_transcript_119535;F01_transcript_122415;F01_transcript_123155;F01_transcript_128446;F01_transcript_135775;F01_transcript_137241;F01_transcript_137431;F01_transcript_138754;F01_transcript_140215;F01_transcript_143766;F01_transcript_147237;F01_transcript_151942;F01_transcript_154009;F01_transcript_154229;F01…
F01_transcript_79160	F01_transcript_64502
F01_transcript_69958	F01_transcript_121192;F01_transcript_122039;F01_transcript_123646;F01_transcript_1407;F01_transcript_25572;F01_transcript_25972;F01_transcript_30404;F01_transcript_30671;F01_transcript_32465;F01_transcript_34812;F01_transcript_36159;F01_transcript_37095;F01_transcript_38892;F01_transcript_389;F01_transcript_39154;F01_transcript_39277;F01_transcript_42498;F01_transcript_45814;F01_transcript_47494;…
F01_transcript_118765	F01_transcript_11577;F01_transcript_126268;F01_transcript_141430;F01_transcript_155666;F01_transcript_245;F01_transcript_31365;F01_transcript_39158;F01_transcript_45717;F01_transcript_56596;F01_transcript_64849;F01_transcript_68277;F01_transcript_85448
F01_transcript_53173	F01_transcript_145586;F01_transcript_25294;F01_transcript_34203;F01_transcript_38668;F01_transcript_47028;F01_transcript_47455;F01_transcript_48964;F01_transcript_49151;F01_transcript_49430;F01_transcript_50806;F01_transcript_51039;F01_transcript_51669;F01_transcript_52202;F01_transcript_52337;F01_transcript_53269;F01_transcript_63328;F01_transcript_89219;F01_transcript_92945;F01_transcript_99474
F01_transcript_89697	F01_transcript_132862
F01_transcript_12792	F01_transcript_109275;F01_transcript_129785;F01_transcript_130401;F01_transcript_134186;F01_transcript_16373;F01_transcript_29679
F01_transcript_139004	F01_transcript_101583;F01_transcript_105440;F01_transcript_108277;F01_transcript_109356;F01_transcript_109392;F01_transcript_109702;F01_transcript_113850;F01_transcript_114344;F01_transcript_115179;F01_transcript_116813;F01_transcript_117889;F01_transcript_118922;F01_transcript_122506;F01_transcript_122723;F01_transcript_123318;F01_transcript_123536;F01_transcript_124775;F01_transcript_127128;F01…
F01_transcript_54392	F01_transcript_103444;F01_transcript_103854;F01_transcript_103895;F01_transcript_104313;F01_transcript_105617;F01_transcript_111068;F01_transcript_114438;F01_transcript_116218;F01_transcript_117021;F01_transcript_119350;F01_transcript_126560;F01_transcript_126744;F01_transcript_128502;F01_transcript_130755;F01_transcript_133086;F01_transcript_141395;F01_transcript_142430;F01_transcript_145749;F01…
F01_transcript_110073	F01_transcript_105566;F01_transcript_110031;F01_transcript_127548;F01_transcript_127988;F01_transcript_130120;F01_transcript_139336;F01_transcript_27623;F01_transcript_29516;F01_transcript_77056;F01_transcript_86396;F01_transcript_87546;F01_transcript_91398
F01_transcript_61299	F01_transcript_100015;F01_transcript_101195;F01_transcript_104451;F01_transcript_105434;F01_transcript_114000;F01_transcript_119376;F01_transcript_119696;F01_transcript_125116;F01_transcript_137441;F01_transcript_138538;F01_transcript_151377;F01_transcript_154753;F01_transcript_35844;F01_transcript_5055;F01_transcript_57002;F01_transcript_62343;F01_transcript_63488;F01_transcript_68494;F01_transc…
F01_transcript_53562	F01_transcript_42405;F01_transcript_49098
F01_transcript_152828	F01_transcript_120451;F01_transcript_153144;F01_transcript_37496
F01_transcript_118751	F01_transcript_103888;F01_transcript_105702;F01_transcript_112594;F01_transcript_115832;F01_transcript_118127;F01_transcript_124021;F01_transcript_128219;F01_transcript_133506;F01_transcript_134651;F01_transcript_134939;F01_transcript_138457;F01_transcript_139148;F01_transcript_143127;F01_transcript_143471;F01_transcript_145040;F01_transcript_19565;F01_transcript_22375;F01_transcript_27485;F01_tr…
F01_transcript_62736	F01_transcript_102555;F01_transcript_106416;F01_transcript_108843;F01_transcript_109299;F01_transcript_111548;F01_transcript_111699;F01_transcript_112537;F01_transcript_112856;F01_transcript_115456;F01_transcript_115558;F01_transcript_117523;F01_transcript_120049;F01_transcript_122525;F01_transcript_131050;F01_transcript_13216;F01_transcript_133171;F01_transcript_133912;F01_transcript_135377;F01_…
F01_transcript_58088	F01_transcript_102138;F01_transcript_106752;F01_transcript_108864;F01_transcript_115715;F01_transcript_115844;F01_transcript_120325;F01_transcript_121689;F01_transcript_123251;F01_transcript_128408;F01_transcript_131577;F01_transcript_131763;F01_transcript_136088;F01_transcript_136658;F01_transcript_138774;F01_transcript_138864;F01_transcript_148200;F01_transcript_148819;F01_transcript_154418;F01…
F01_transcript_113981	F01_transcript_145937
F01_transcript_121993	F01_transcript_101631;F01_transcript_101646;F01_transcript_102191;F01_transcript_104561;F01_transcript_104642;F01_transcript_107014;F01_transcript_107179;F01_transcript_108411;F01_transcript_109036;F01_transcript_109293;F01_transcript_109719;F01_transcript_111723;F01_transcript_111945;F01_transcript_112350;F01_transcript_114300;F01_transcript_114851;F01_transcript_115590;F01_transcript_117976;F01…
F01_transcript_111936	F01_transcript_100432;F01_transcript_105795;F01_transcript_106159;F01_transcript_107186;F01_transcript_115005;F01_transcript_117257;F01_transcript_120632;F01_transcript_124197;F01_transcript_124362;F01_transcript_125353;F01_transcript_126302;F01_transcript_129082;F01_transcript_133072;F01_transcript_135640;F01_transcript_13582;F01_transcript_142819;F01_transcript_145478;F01_transcript_145894;F01_…
F01_transcript_15633	F01_transcript_122510;F01_transcript_139864;F01_transcript_69966;F01_transcript_86046;F01_transcript_95582
F01_transcript_47422	F01_transcript_100437;F01_transcript_100812;F01_transcript_105472;F01_transcript_108907;F01_transcript_110026;F01_transcript_112075;F01_transcript_114708;F01_transcript_115103;F01_transcript_116501;F01_transcript_117678;F01_transcript_118490;F01_transcript_121213;F01_transcript_121232;F01_transcript_121263;F01_transcript_125045;F01_transcript_125057;F01_transcript_125545;F01_transcript_126310;F01…
F01_transcript_91148	F01_transcript_125195;F01_transcript_128307;F01_transcript_147499
F01_transcript_60008	F01_transcript_136941;F01_transcript_94560
F01_transcript_139809	F01_transcript_100333;F01_transcript_101774;F01_transcript_103297;F01_transcript_103424;F01_transcript_103448;F01_transcript_105695;F01_transcript_105816;F01_transcript_112265;F01_transcript_113684;F01_transcript_114287;F01_transcript_123895;F01_transcript_123906;F01_transcript_125421;F01_transcript_128260;F01_transcript_133426;F01_transcript_134247;F01_transcript_140677;F01_transcript_140873;F01…
F01_transcript_81365	F01_transcript_137908;F01_transcript_64303
F01_transcript_55801	F01_transcript_108288;F01_transcript_123012;F01_transcript_130979;F01_transcript_141542;F01_transcript_151733;F01_transcript_154625;F01_transcript_18298;F01_transcript_37880;F01_transcript_45366;F01_transcript_48647;F01_transcript_59919
F01_transcript_58592	F01_transcript_106080;F01_transcript_114695;F01_transcript_119828;F01_transcript_124469;F01_transcript_147554;F01_transcript_150288;F01_transcript_150635;F01_transcript_156090;F01_transcript_38611;F01_transcript_61197;F01_transcript_72108;F01_transcript_73455
F01_transcript_114564	F01_transcript_101081;F01_transcript_101416;F01_transcript_101430;F01_transcript_101592;F01_transcript_101911;F01_transcript_101992;F01_transcript_102527;F01_transcript_103329;F01_transcript_103963;F01_transcript_104773;F01_transcript_104819;F01_transcript_105612;F01_transcript_105694;F01_transcript_106261;F01_transcript_106416;F01_transcript_106973;F01_transcript_107369;F01_transcript_10766;F01_…
F01_transcript_52698	F01_transcript_112258;F01_transcript_37342;F01_transcript_47214;F01_transcript_96957
F01_transcript_75455	F01_transcript_100354;F01_transcript_111346;F01_transcript_114525;F01_transcript_115188;F01_transcript_121896;F01_transcript_122640;F01_transcript_122707;F01_transcript_125251;F01_transcript_130295;F01_transcript_133095;F01_transcript_139579;F01_transcript_139881;F01_transcript_140460;F01_transcript_152845;F01_transcript_33041;F01_transcript_56679;F01_transcript_70682;F01_transcript_76333;F01_tra…
F01_transcript_99745	F01_transcript_109657;F01_transcript_54947;F01_transcript_90257
F01_transcript_86177	F01_transcript_100269;F01_transcript_116454;F01_transcript_128167;F01_transcript_13689;F01_transcript_145413
F01_transcript_81240	F01_transcript_108631;F01_transcript_110683;F01_transcript_47606;F01_transcript_58532;F01_transcript_59644
F01_transcript_53336	F01_transcript_110026;F01_transcript_118490;F01_transcript_126920;F01_transcript_128650;F01_transcript_138891;F01_transcript_147302;F01_transcript_147964;F01_transcript_32611;F01_transcript_42192;F01_transcript_45146;F01_transcript_45309;F01_transcript_46963;F01_transcript_47104;F01_transcript_47119;F01_transcript_49355;F01_transcript_50069;F01_transcript_53158;F01_transcript_5917;F01_transcript_…
F01_transcript_59525	F01_transcript_136645;F01_transcript_21490;F01_transcript_68037;F01_transcript_89606;F01_transcript_95778
F01_transcript_139530	F01_transcript_101218;F01_transcript_101753;F01_transcript_102291;F01_transcript_102659;F01_transcript_10302;F01_transcript_105493;F01_transcript_106496;F01_transcript_109101;F01_transcript_110701;F01_transcript_110854;F01_transcript_11107;F01_transcript_113728;F01_transcript_115618;F01_transcript_115898;F01_transcript_11630;F01_transcript_119669;F01_transcript_120166;F01_transcript_122275;F01_tr…
F01_transcript_122522	F01_transcript_100009;F01_transcript_100137;F01_transcript_102755;F01_transcript_103192;F01_transcript_103619;F01_transcript_106226;F01_transcript_106729;F01_transcript_112380;F01_transcript_114696;F01_transcript_119181;F01_transcript_119420;F01_transcript_119465;F01_transcript_119591;F01_transcript_119601;F01_transcript_120096;F01_transcript_121026;F01_transcript_122033;F01_transcript_125728;F01…
F01_transcript_70596	F01_transcript_146099
F01_transcript_124242	F01_transcript_88122;F01_transcript_97598
F01_transcript_130345	F01_transcript_100479;F01_transcript_101201;F01_transcript_108098;F01_transcript_110250;F01_transcript_110930;F01_transcript_111316;F01_transcript_113398;F01_transcript_114859;F01_transcript_115184;F01_transcript_115807;F01_transcript_117700;F01_transcript_120294;F01_transcript_122387;F01_transcript_123218;F01_transcript_123800;F01_transcript_124854;F01_transcript_126251;F01_transcript_128237;F01…
F01_transcript_104058	F01_transcript_121917;F01_transcript_81265
F01_transcript_118739	F01_transcript_131855;F01_transcript_65685;F01_transcript_79616
F01_transcript_134675	F01_transcript_101149;F01_transcript_101784;F01_transcript_105260;F01_transcript_107424;F01_transcript_109272;F01_transcript_111557;F01_transcript_113609;F01_transcript_114489;F01_transcript_119835;F01_transcript_125307;F01_transcript_125882;F01_transcript_126846;F01_transcript_128802;F01_transcript_130581;F01_transcript_13430;F01_transcript_134706;F01_transcript_138280;F01_transcript_148713;F01_…
F01_transcript_53773	F01_transcript_102521;F01_transcript_113955;F01_transcript_117301;F01_transcript_118926;F01_transcript_119111;F01_transcript_123270;F01_transcript_124583;F01_transcript_134327;F01_transcript_143443;F01_transcript_146182;F01_transcript_25328;F01_transcript_29423;F01_transcript_42912;F01_transcript_45949;F01_transcript_49069;F01_transcript_5801;F01_transcript_58667;F01_transcript_60969;F01_transcri…
F01_transcript_86040	F01_transcript_141043;F01_transcript_74258
F01_transcript_132257	F01_transcript_100250;F01_transcript_101050;F01_transcript_102598;F01_transcript_102690;F01_transcript_105023;F01_transcript_106001;F01_transcript_106295;F01_transcript_106570;F01_transcript_124115;F01_transcript_126444;F01_transcript_126759;F01_transcript_127268;F01_transcript_127551;F01_transcript_13867;F01_transcript_139780;F01_transcript_141985;F01_transcript_142879;F01_transcript_144081;F01_…
F01_transcript_61007	F01_transcript_105651;F01_transcript_107520;F01_transcript_107642;F01_transcript_108000;F01_transcript_111384;F01_transcript_118869;F01_transcript_122248;F01_transcript_122724;F01_transcript_123934;F01_transcript_127567;F01_transcript_128570;F01_transcript_134006;F01_transcript_138915;F01_transcript_139652;F01_transcript_139950;F01_transcript_150494;F01_transcript_151494;F01_transcript_155563;F01…
F01_transcript_115020	F01_transcript_1149;F01_transcript_118874;F01_transcript_3842;F01_transcript_95978;F01_transcript_99121
F01_transcript_53564	F01_transcript_100635;F01_transcript_101858;F01_transcript_105646;F01_transcript_106404;F01_transcript_107601;F01_transcript_109276;F01_transcript_109764;F01_transcript_113453;F01_transcript_116273;F01_transcript_116526;F01_transcript_116869;F01_transcript_119116;F01_transcript_120197;F01_transcript_120414;F01_transcript_12755;F01_transcript_129399;F01_transcript_129797;F01_transcript_131037;F01_…
F01_transcript_89076	F01_transcript_105651;F01_transcript_107520;F01_transcript_107642;F01_transcript_108000;F01_transcript_118869;F01_transcript_122248;F01_transcript_122724;F01_transcript_123934;F01_transcript_127567;F01_transcript_128570;F01_transcript_134006;F01_transcript_138915;F01_transcript_139652;F01_transcript_139950;F01_transcript_150494;F01_transcript_151494;F01_transcript_155563;F01_transcript_1625;F01_t…
F01_transcript_110851	F01_transcript_100337;F01_transcript_100342;F01_transcript_100923;F01_transcript_101874;F01_transcript_103525;F01_transcript_1040;F01_transcript_104572;F01_transcript_104660;F01_transcript_104776;F01_transcript_105409;F01_transcript_105556;F01_transcript_105790;F01_transcript_105898;F01_transcript_105974;F01_transcript_106177;F01_transcript_107559;F01_transcript_107779;F01_transcript_107896;F01_t…
F01_transcript_64320	F01_transcript_105790;F01_transcript_109500;F01_transcript_114241;F01_transcript_116189;F01_transcript_120573;F01_transcript_121987;F01_transcript_123346;F01_transcript_12887;F01_transcript_131902;F01_transcript_13455;F01_transcript_139720;F01_transcript_140794;F01_transcript_144115;F01_transcript_147302;F01_transcript_148031;F01_transcript_148824;F01_transcript_150968;F01_transcript_151287;F01_t…
F01_transcript_59310	F01_transcript_100728;F01_transcript_100812;F01_transcript_105472;F01_transcript_107101;F01_transcript_107345;F01_transcript_108980;F01_transcript_110005;F01_transcript_115103;F01_transcript_119620;F01_transcript_121232;F01_transcript_121268;F01_transcript_123676;F01_transcript_125057;F01_transcript_128489;F01_transcript_129717;F01_transcript_130439;F01_transcript_148372;F01_transcript_150613;F01…
F01_transcript_68099	F01_transcript_22829;F01_transcript_59201
F01_transcript_67206	F01_transcript_71611
F01_transcript_131345	F01_transcript_100192;F01_transcript_50240;F01_transcript_51263;F01_transcript_51878
F01_transcript_138372	F01_transcript_96808
F01_transcript_78540	F01_transcript_28105
F01_transcript_59837	F01_transcript_100658;F01_transcript_101632;F01_transcript_105989;F01_transcript_106681;F01_transcript_108286;F01_transcript_108350;F01_transcript_110726;F01_transcript_111459;F01_transcript_112493;F01_transcript_116570;F01_transcript_119413;F01_transcript_121975;F01_transcript_122093;F01_transcript_123978;F01_transcript_125883;F01_transcript_12609;F01_transcript_127184;F01_transcript_127384;F01_…
F01_transcript_135190	F01_transcript_100015;F01_transcript_101195;F01_transcript_104451;F01_transcript_105434;F01_transcript_114000;F01_transcript_115205;F01_transcript_119376;F01_transcript_119696;F01_transcript_125116;F01_transcript_137441;F01_transcript_138538;F01_transcript_151377;F01_transcript_154753;F01_transcript_35844;F01_transcript_5055;F01_transcript_57002;F01_transcript_62343;F01_transcript_63488;F01_trans…
F01_transcript_82409	F01_transcript_100437;F01_transcript_100812;F01_transcript_101753;F01_transcript_101825;F01_transcript_102291;F01_transcript_10302;F01_transcript_104274;F01_transcript_105472;F01_transcript_105493;F01_transcript_105594;F01_transcript_105937;F01_transcript_106053;F01_transcript_106496;F01_transcript_106810;F01_transcript_10687;F01_transcript_107101;F01_transcript_107345;F01_transcript_107605;F01_t…
F01_transcript_78795	F01_transcript_17206;F01_transcript_70956;F01_transcript_85715
F01_transcript_39429	F01_transcript_100513;F01_transcript_101906;F01_transcript_102707;F01_transcript_102717;F01_transcript_104805;F01_transcript_104899;F01_transcript_105674;F01_transcript_106635;F01_transcript_109878;F01_transcript_110138;F01_transcript_110846;F01_transcript_112749;F01_transcript_114515;F01_transcript_116487;F01_transcript_117077;F01_transcript_11832;F01_transcript_121576;F01_transcript_121732;F01_…
F01_transcript_119026	F01_transcript_100368;F01_transcript_100666;F01_transcript_101559;F01_transcript_101662;F01_transcript_102298;F01_transcript_104032;F01_transcript_104644;F01_transcript_104929;F01_transcript_105886;F01_transcript_107306;F01_transcript_107751;F01_transcript_108451;F01_transcript_113579;F01_transcript_113955;F01_transcript_114304;F01_transcript_115852;F01_transcript_117301;F01_transcript_117633;F01…
F01_transcript_105417	F01_transcript_105036;F01_transcript_114415;F01_transcript_43690;F01_transcript_73259
F01_transcript_53816	F01_transcript_101371;F01_transcript_112259;F01_transcript_116220;F01_transcript_120777;F01_transcript_121680;F01_transcript_124470;F01_transcript_125455;F01_transcript_126955;F01_transcript_127784;F01_transcript_137966;F01_transcript_139918;F01_transcript_140632;F01_transcript_146097;F01_transcript_147617;F01_transcript_149377;F01_transcript_155157;F01_transcript_16262;F01_transcript_31395;F01_t…
F01_transcript_112330	F01_transcript_104644;F01_transcript_107306;F01_transcript_121375;F01_transcript_148483;F01_transcript_150385;F01_transcript_63342;F01_transcript_6855;F01_transcript_72044;F01_transcript_7638;F01_transcript_83497;F01_transcript_88861;F01_transcript_93722
F01_transcript_131439	F01_transcript_100028;F01_transcript_104929;F01_transcript_107306;F01_transcript_110086;F01_transcript_113579;F01_transcript_115852;F01_transcript_117644;F01_transcript_121646;F01_transcript_122034;F01_transcript_123466;F01_transcript_125357;F01_transcript_139620;F01_transcript_140097;F01_transcript_142415;F01_transcript_142667;F01_transcript_146688;F01_transcript_146884;F01_transcript_148483;F01…
F01_transcript_132311	F01_transcript_108114;F01_transcript_113774;F01_transcript_1234;F01_transcript_135494;F01_transcript_136645;F01_transcript_146134;F01_transcript_152674;F01_transcript_21490;F01_transcript_29656;F01_transcript_34998;F01_transcript_3692;F01_transcript_62941;F01_transcript_70900;F01_transcript_71366;F01_transcript_74388;F01_transcript_76421;F01_transcript_79797;F01_transcript_81566;F01_transcript_95…
F01_transcript_11440	F01_transcript_138968
F01_transcript_98159	F01_transcript_144590
F01_transcript_127378	F01_transcript_155409;F01_transcript_21426;F01_transcript_41778;F01_transcript_60817;F01_transcript_91253
F01_transcript_107443	F01_transcript_10519;F01_transcript_106558;F01_transcript_108646;F01_transcript_111094;F01_transcript_121987;F01_transcript_12496;F01_transcript_128267;F01_transcript_128397;F01_transcript_128836;F01_transcript_129267;F01_transcript_130091;F01_transcript_132705;F01_transcript_13455;F01_transcript_135794;F01_transcript_139599;F01_transcript_140742;F01_transcript_143121;F01_transcript_145278;F01_tr…
F01_transcript_108962	F01_transcript_101535;F01_transcript_3746
F01_transcript_136864	F01_transcript_100539;F01_transcript_107812;F01_transcript_124966;F01_transcript_128032;F01_transcript_132084;F01_transcript_134640;F01_transcript_13544;F01_transcript_14018;F01_transcript_14502;F01_transcript_14815;F01_transcript_152501;F01_transcript_17039;F01_transcript_17311;F01_transcript_17377;F01_transcript_21228;F01_transcript_27114;F01_transcript_29725;F01_transcript_36262;F01_transcript…
F01_transcript_131450	F01_transcript_100908;F01_transcript_109455;F01_transcript_110647;F01_transcript_111629;F01_transcript_113663;F01_transcript_116335;F01_transcript_118804;F01_transcript_119317;F01_transcript_122705;F01_transcript_125514;F01_transcript_126305;F01_transcript_126559;F01_transcript_128161;F01_transcript_136459;F01_transcript_149935;F01_transcript_153511;F01_transcript_17206;F01_transcript_25014;F01_t…
F01_transcript_62687	F01_transcript_100107;F01_transcript_101874;F01_transcript_102715;F01_transcript_103525;F01_transcript_104776;F01_transcript_105112;F01_transcript_105212;F01_transcript_105898;F01_transcript_106162;F01_transcript_106399;F01_transcript_107029;F01_transcript_107896;F01_transcript_109787;F01_transcript_109795;F01_transcript_109980;F01_transcript_111013;F01_transcript_111759;F01_transcript_111860;F01…
F01_transcript_93258	F01_transcript_10540;F01_transcript_113008;F01_transcript_120929;F01_transcript_127392;F01_transcript_127849;F01_transcript_138918;F01_transcript_13935;F01_transcript_140444;F01_transcript_155265;F01_transcript_16737;F01_transcript_19189;F01_transcript_19600;F01_transcript_20362;F01_transcript_21130;F01_transcript_21360;F01_transcript_22282;F01_transcript_26154;F01_transcript_27711;F01_transcript…
F01_transcript_124051	F01_transcript_128507;F01_transcript_15627;F01_transcript_55664;F01_transcript_81042
F01_transcript_123949	F01_transcript_117100
F01_transcript_89742	F01_transcript_93839
F01_transcript_134828	F01_transcript_87767
F01_transcript_82894	F01_transcript_107998;F01_transcript_135269;F01_transcript_148584;F01_transcript_151988;F01_transcript_98255
F01_transcript_121113	F01_transcript_70685
F01_transcript_53940	F01_transcript_104085;F01_transcript_105745;F01_transcript_107757;F01_transcript_109119;F01_transcript_112760;F01_transcript_119244;F01_transcript_124465;F01_transcript_124480;F01_transcript_124909;F01_transcript_128004;F01_transcript_128054;F01_transcript_131097;F01_transcript_133477;F01_transcript_134939;F01_transcript_137254;F01_transcript_138882;F01_transcript_142896;F01_transcript_14522;F01_…
F01_transcript_80415	F01_transcript_102268;F01_transcript_10332;F01_transcript_103447;F01_transcript_103819;F01_transcript_104906;F01_transcript_106135;F01_transcript_1069;F01_transcript_107184;F01_transcript_107444;F01_transcript_110641;F01_transcript_11454;F01_transcript_119416;F01_transcript_120650;F01_transcript_121656;F01_transcript_122007;F01_transcript_123266;F01_transcript_123699;F01_transcript_123825;F01_tra…
F01_transcript_134897	F01_transcript_146318;F01_transcript_55378;F01_transcript_63707
F01_transcript_91774	F01_transcript_11045;F01_transcript_11827;F01_transcript_55427
F01_transcript_65445	F01_transcript_10000;F01_transcript_100033;F01_transcript_100343;F01_transcript_100911;F01_transcript_101152;F01_transcript_101250;F01_transcript_101998;F01_transcript_102486;F01_transcript_10283;F01_transcript_103143;F01_transcript_103173;F01_transcript_103529;F01_transcript_103925;F01_transcript_104524;F01_transcript_104848;F01_transcript_105144;F01_transcript_105322;F01_transcript_105408;F01_t…
F01_transcript_78500	F01_transcript_100630;F01_transcript_100843;F01_transcript_101134;F01_transcript_103307;F01_transcript_104492;F01_transcript_104911;F01_transcript_108062;F01_transcript_108139;F01_transcript_112942;F01_transcript_113672;F01_transcript_114067;F01_transcript_115843;F01_transcript_116560;F01_transcript_118129;F01_transcript_119836;F01_transcript_12277;F01_transcript_126087;F01_transcript_126218;F01_…
F01_transcript_100264	F01_transcript_101998;F01_transcript_102218;F01_transcript_102482;F01_transcript_10283;F01_transcript_105144;F01_transcript_105322;F01_transcript_107879;F01_transcript_109600;F01_transcript_111024;F01_transcript_112740;F01_transcript_11316;F01_transcript_115094;F01_transcript_11792;F01_transcript_117974;F01_transcript_118561;F01_transcript_11886;F01_transcript_119595;F01_transcript_119842;F01_tra…
F01_transcript_87114	F01_transcript_101613;F01_transcript_110741;F01_transcript_115135;F01_transcript_128836;F01_transcript_154675;F01_transcript_25154;F01_transcript_3561;F01_transcript_68540;F01_transcript_70288;F01_transcript_71587;F01_transcript_87620;F01_transcript_99298
F01_transcript_53214	F01_transcript_100812;F01_transcript_101783;F01_transcript_102792;F01_transcript_104274;F01_transcript_105472;F01_transcript_105493;F01_transcript_105594;F01_transcript_107013;F01_transcript_107101;F01_transcript_107345;F01_transcript_109242;F01_transcript_109796;F01_transcript_110005;F01_transcript_110293;F01_transcript_112075;F01_transcript_112859;F01_transcript_115067;F01_transcript_115103;F01…
F01_transcript_75962	F01_transcript_100107;F01_transcript_100128;F01_transcript_100342;F01_transcript_101568;F01_transcript_101613;F01_transcript_101874;F01_transcript_103221;F01_transcript_10438;F01_transcript_105039;F01_transcript_105097;F01_transcript_105556;F01_transcript_105732;F01_transcript_107869;F01_transcript_107896;F01_transcript_10880;F01_transcript_109753;F01_transcript_109795;F01_transcript_109980;F01_t…
F01_transcript_125108	F01_transcript_100067;F01_transcript_100232;F01_transcript_100601;F01_transcript_100792;F01_transcript_100868;F01_transcript_101413;F01_transcript_102800;F01_transcript_102813;F01_transcript_102910;F01_transcript_102929;F01_transcript_102957;F01_transcript_102971;F01_transcript_102991;F01_transcript_103184;F01_transcript_103551;F01_transcript_103638;F01_transcript_103798;F01_transcript_104459;F01…
F01_transcript_104108	F01_transcript_107714;F01_transcript_116161;F01_transcript_117371;F01_transcript_123748;F01_transcript_125952;F01_transcript_128485;F01_transcript_129424;F01_transcript_13124;F01_transcript_131902;F01_transcript_132840;F01_transcript_135544;F01_transcript_135620;F01_transcript_136602;F01_transcript_137538;F01_transcript_14285;F01_transcript_18143;F01_transcript_22335;F01_transcript_25210;F01_tran…
F01_transcript_87195	F01_transcript_100028;F01_transcript_88948
F01_transcript_67800	F01_transcript_100908;F01_transcript_101398;F01_transcript_102829;F01_transcript_102897;F01_transcript_105001;F01_transcript_105801;F01_transcript_106348;F01_transcript_106451;F01_transcript_108532;F01_transcript_109455;F01_transcript_110647;F01_transcript_110843;F01_transcript_111629;F01_transcript_112970;F01_transcript_113663;F01_transcript_118804;F01_transcript_119317;F01_transcript_120575;F01…
F01_transcript_49787	F01_transcript_107838;F01_transcript_131603;F01_transcript_143536;F01_transcript_150158;F01_transcript_22427;F01_transcript_30708;F01_transcript_34441;F01_transcript_34838;F01_transcript_55654;F01_transcript_56084;F01_transcript_73835;F01_transcript_86382
F01_transcript_51186	F01_transcript_130615;F01_transcript_138457;F01_transcript_45548;F01_transcript_49317;F01_transcript_60108;F01_transcript_81382
F01_transcript_128733	F01_transcript_56301
F01_transcript_86096	F01_transcript_104348;F01_transcript_107953;F01_transcript_113110;F01_transcript_145484;F01_transcript_91088;F01_transcript_94756;F01_transcript_99154
F01_transcript_75748	F01_transcript_10000;F01_transcript_100057;F01_transcript_101003;F01_transcript_101998;F01_transcript_102482;F01_transcript_10283;F01_transcript_103143;F01_transcript_103173;F01_transcript_103925;F01_transcript_104524;F01_transcript_105144;F01_transcript_105322;F01_transcript_107521;F01_transcript_107879;F01_transcript_108018;F01_transcript_108077;F01_transcript_108402;F01_transcript_109600;F01_t…
F01_transcript_68408	F01_transcript_105541;F01_transcript_108090;F01_transcript_120921;F01_transcript_135985;F01_transcript_139803;F01_transcript_140958;F01_transcript_145591;F01_transcript_147835;F01_transcript_149163;F01_transcript_149460;F01_transcript_23769;F01_transcript_31434;F01_transcript_323;F01_transcript_39753;F01_transcript_46197;F01_transcript_48098;F01_transcript_48511;F01_transcript_48755;F01_transcrip…
F01_transcript_142799	F01_transcript_102336;F01_transcript_102595;F01_transcript_103959;F01_transcript_105745;F01_transcript_107757;F01_transcript_110847;F01_transcript_111845;F01_transcript_118046;F01_transcript_120439;F01_transcript_124480;F01_transcript_124909;F01_transcript_125578;F01_transcript_127335;F01_transcript_128004;F01_transcript_128054;F01_transcript_128327;F01_transcript_129041;F01_transcript_131097;F01…
F01_transcript_95583	F01_transcript_100213;F01_transcript_101264;F01_transcript_101753;F01_transcript_102291;F01_transcript_102532;F01_transcript_102659;F01_transcript_102957;F01_transcript_10302;F01_transcript_105472;F01_transcript_105493;F01_transcript_105594;F01_transcript_105937;F01_transcript_106053;F01_transcript_106810;F01_transcript_107163;F01_transcript_107871;F01_transcript_107883;F01_transcript_108114;F01_…
F01_transcript_99905	F01_transcript_113598;F01_transcript_114009;F01_transcript_115832;F01_transcript_115932;F01_transcript_122337;F01_transcript_129296;F01_transcript_131643;F01_transcript_153189;F01_transcript_16244;F01_transcript_26512;F01_transcript_28150;F01_transcript_28456;F01_transcript_29373;F01_transcript_32083;F01_transcript_32598;F01_transcript_33385;F01_transcript_34383;F01_transcript_35168;F01_transcrip…
F01_transcript_52730	F01_transcript_140326
F01_transcript_49312	F01_transcript_117564
F01_transcript_103195	F01_transcript_143736;F01_transcript_153957
F01_transcript_132461	F01_transcript_102673;F01_transcript_104078;F01_transcript_113432;F01_transcript_116712;F01_transcript_119837;F01_transcript_125495;F01_transcript_129924;F01_transcript_133535;F01_transcript_137013;F01_transcript_144589;F01_transcript_146748;F01_transcript_150665;F01_transcript_24121;F01_transcript_26056;F01_transcript_30161;F01_transcript_36246;F01_transcript_39003;F01_transcript_41153;F01_trans…
F01_transcript_130224	F01_transcript_117154;F01_transcript_130342;F01_transcript_149554;F01_transcript_153995;F01_transcript_59636;F01_transcript_67825;F01_transcript_90331;F01_transcript_96629
F01_transcript_108609	F01_transcript_100268;F01_transcript_102659;F01_transcript_106053;F01_transcript_115898;F01_transcript_134904;F01_transcript_143889;F01_transcript_155487;F01_transcript_15587;F01_transcript_19246;F01_transcript_21490;F01_transcript_23688;F01_transcript_2989;F01_transcript_39778;F01_transcript_41816;F01_transcript_42492;F01_transcript_43877;F01_transcript_45087;F01_transcript_4715;F01_transcript_5…
F01_transcript_110091	F01_transcript_100187;F01_transcript_103708;F01_transcript_10519;F01_transcript_105237;F01_transcript_106558;F01_transcript_108646;F01_transcript_110741;F01_transcript_111094;F01_transcript_113170;F01_transcript_115135;F01_transcript_119685;F01_transcript_12496;F01_transcript_127051;F01_transcript_128397;F01_transcript_128836;F01_transcript_132705;F01_transcript_135794;F01_transcript_136318;F01_t…
F01_transcript_87728	F01_transcript_100513;F01_transcript_101906;F01_transcript_102707;F01_transcript_102717;F01_transcript_104805;F01_transcript_104899;F01_transcript_105674;F01_transcript_106635;F01_transcript_109878;F01_transcript_110138;F01_transcript_110846;F01_transcript_112749;F01_transcript_114515;F01_transcript_116487;F01_transcript_117077;F01_transcript_11832;F01_transcript_121576;F01_transcript_121732;F01_…
F01_transcript_110769	F01_transcript_100015;F01_transcript_100532;F01_transcript_101195;F01_transcript_104451;F01_transcript_105434;F01_transcript_107413;F01_transcript_109309;F01_transcript_114000;F01_transcript_119376;F01_transcript_119696;F01_transcript_121202;F01_transcript_125116;F01_transcript_133498;F01_transcript_137441;F01_transcript_138538;F01_transcript_142856;F01_transcript_151377;F01_transcript_154753;F01…
F01_transcript_78336	F01_transcript_107596;F01_transcript_118258;F01_transcript_119853;F01_transcript_12105;F01_transcript_12194;F01_transcript_123827;F01_transcript_126533;F01_transcript_127284;F01_transcript_129355;F01_transcript_134218;F01_transcript_136205;F01_transcript_137013;F01_transcript_139803;F01_transcript_13990;F01_transcript_140556;F01_transcript_143110;F01_transcript_146708;F01_transcript_148771;F01_tr…
F01_transcript_113967	F01_transcript_102252;F01_transcript_103615;F01_transcript_110150;F01_transcript_112155;F01_transcript_114009;F01_transcript_115832;F01_transcript_117585;F01_transcript_149107;F01_transcript_16244;F01_transcript_22801;F01_transcript_26512;F01_transcript_28150;F01_transcript_32673;F01_transcript_32850;F01_transcript_36519;F01_transcript_38872;F01_transcript_39026;F01_transcript_40570;F01_transcrip…
F01_transcript_102620	F01_transcript_110011;F01_transcript_121657;F01_transcript_131270;F01_transcript_137431;F01_transcript_60874;F01_transcript_62775
F01_transcript_131861	F01_transcript_10313;F01_transcript_109030;F01_transcript_116949;F01_transcript_117354;F01_transcript_117440;F01_transcript_119130;F01_transcript_119527;F01_transcript_142792;F01_transcript_147648;F01_transcript_150147;F01_transcript_151171;F01_transcript_153446;F01_transcript_55992;F01_transcript_56423;F01_transcript_59149;F01_transcript_68914;F01_transcript_71361;F01_transcript_73684;F01_transc…
F01_transcript_64654	F01_transcript_102336;F01_transcript_103959;F01_transcript_105840;F01_transcript_123772;F01_transcript_124755;F01_transcript_125578;F01_transcript_126464;F01_transcript_127409;F01_transcript_128327;F01_transcript_131468;F01_transcript_132305;F01_transcript_132433;F01_transcript_134570;F01_transcript_139686;F01_transcript_140605;F01_transcript_143127;F01_transcript_145655;F01_transcript_146058;F01…
F01_transcript_139558	F01_transcript_100080;F01_transcript_109175;F01_transcript_110153;F01_transcript_113002;F01_transcript_117215;F01_transcript_119131;F01_transcript_129586;F01_transcript_129612;F01_transcript_129615;F01_transcript_132044;F01_transcript_136008;F01_transcript_138585;F01_transcript_147290;F01_transcript_153218;F01_transcript_4453;F01_transcript_56960;F01_transcript_61094;F01_transcript_68959;F01_tran…
F01_transcript_54603	F01_transcript_125384;F01_transcript_146167;F01_transcript_73950;F01_transcript_82949;F01_transcript_86111
F01_transcript_79627	F01_transcript_119527
F01_transcript_150327	F01_transcript_101264;F01_transcript_102019;F01_transcript_102291;F01_transcript_102659;F01_transcript_102843;F01_transcript_10302;F01_transcript_104370;F01_transcript_104875;F01_transcript_105286;F01_transcript_106053;F01_transcript_107714;F01_transcript_107883;F01_transcript_108114;F01_transcript_110360;F01_transcript_11109;F01_transcript_113774;F01_transcript_114674;F01_transcript_116161;F01_t…
F01_transcript_46598	F01_transcript_100192;F01_transcript_105409;F01_transcript_106096;F01_transcript_110026;F01_transcript_112666;F01_transcript_112772;F01_transcript_117678;F01_transcript_118490;F01_transcript_125545;F01_transcript_126920;F01_transcript_128650;F01_transcript_129293;F01_transcript_130891;F01_transcript_131705;F01_transcript_134444;F01_transcript_143779;F01_transcript_144035;F01_transcript_147302;F01…
F01_transcript_44247	F01_transcript_100129;F01_transcript_105698;F01_transcript_113154;F01_transcript_114475;F01_transcript_115985;F01_transcript_117492;F01_transcript_120659;F01_transcript_124918;F01_transcript_125562;F01_transcript_128941;F01_transcript_130676;F01_transcript_130846;F01_transcript_132378;F01_transcript_133800;F01_transcript_136092;F01_transcript_136794;F01_transcript_137759;F01_transcript_137784;F01…
F01_transcript_119924	F01_transcript_109030;F01_transcript_116949;F01_transcript_117354;F01_transcript_117440;F01_transcript_119130;F01_transcript_119527;F01_transcript_142792;F01_transcript_147648;F01_transcript_150147;F01_transcript_151171;F01_transcript_153446;F01_transcript_55992;F01_transcript_56423;F01_transcript_59149;F01_transcript_68914;F01_transcript_71361;F01_transcript_73684;F01_transcript_74300;F01_transc…
F01_transcript_98431	F01_transcript_117564;F01_transcript_142530;F01_transcript_147875;F01_transcript_43569;F01_transcript_52157;F01_transcript_71665;F01_transcript_73262
F01_transcript_64600	F01_transcript_10000;F01_transcript_103925;F01_transcript_105441;F01_transcript_107326;F01_transcript_108018;F01_transcript_108763;F01_transcript_109109;F01_transcript_117886;F01_transcript_127860;F01_transcript_12984;F01_transcript_131490;F01_transcript_132768;F01_transcript_134512;F01_transcript_135664;F01_transcript_137805;F01_transcript_139351;F01_transcript_13983;F01_transcript_139891;F01_tr…
F01_transcript_134301	F01_transcript_100269;F01_transcript_101991;F01_transcript_102398;F01_transcript_103975;F01_transcript_107664;F01_transcript_108497;F01_transcript_109200;F01_transcript_110999;F01_transcript_111155;F01_transcript_113123;F01_transcript_116152;F01_transcript_117135;F01_transcript_120260;F01_transcript_120957;F01_transcript_121566;F01_transcript_123213;F01_transcript_125488;F01_transcript_128078;F01…
F01_transcript_97036	F01_transcript_104439;F01_transcript_134216;F01_transcript_139599;F01_transcript_140854;F01_transcript_152098;F01_transcript_2328;F01_transcript_31597;F01_transcript_5045;F01_transcript_51263;F01_transcript_51878;F01_transcript_60742;F01_transcript_70091
F01_transcript_121858	F01_transcript_101783;F01_transcript_102291;F01_transcript_10245;F01_transcript_102532;F01_transcript_103760;F01_transcript_104274;F01_transcript_104449;F01_transcript_105015;F01_transcript_105472;F01_transcript_105493;F01_transcript_105594;F01_transcript_106080;F01_transcript_106274;F01_transcript_10656;F01_transcript_109101;F01_transcript_109242;F01_transcript_109796;F01_transcript_109898;F01_t…
F01_transcript_137788	F01_transcript_103708;F01_transcript_106308;F01_transcript_107481;F01_transcript_107792;F01_transcript_115812;F01_transcript_118874;F01_transcript_132459;F01_transcript_134007;F01_transcript_134055;F01_transcript_137444;F01_transcript_137809;F01_transcript_141392;F01_transcript_156039;F01_transcript_2263;F01_transcript_4334;F01_transcript_56831;F01_transcript_57477;F01_transcript_57870;F01_transc…
F01_transcript_128916	F01_transcript_103305;F01_transcript_103615;F01_transcript_105296;F01_transcript_114009;F01_transcript_120664;F01_transcript_122337;F01_transcript_126216;F01_transcript_129296;F01_transcript_130817;F01_transcript_131643;F01_transcript_132355;F01_transcript_132465;F01_transcript_13642;F01_transcript_138346;F01_transcript_138859;F01_transcript_16244;F01_transcript_18863;F01_transcript_20242;F01_tra…
F01_transcript_51439	F01_transcript_117738;F01_transcript_152134;F01_transcript_41058;F01_transcript_45892;F01_transcript_47399;F01_transcript_49682;F01_transcript_87634
F01_transcript_70113	F01_transcript_110669;F01_transcript_111924;F01_transcript_116849;F01_transcript_117193;F01_transcript_117506;F01_transcript_117861;F01_transcript_120594;F01_transcript_123096;F01_transcript_125033;F01_transcript_125939;F01_transcript_127222;F01_transcript_129118;F01_transcript_131268;F01_transcript_135972;F01_transcript_149128;F01_transcript_151937;F01_transcript_152234;F01_transcript_153414;F01…
F01_transcript_98277	F01_transcript_155734;F01_transcript_42368;F01_transcript_84043;F01_transcript_87732
F01_transcript_126054	F01_transcript_105472;F01_transcript_106274;F01_transcript_109796;F01_transcript_109898;F01_transcript_110142;F01_transcript_114504;F01_transcript_119232;F01_transcript_127849;F01_transcript_138738;F01_transcript_139581;F01_transcript_141273;F01_transcript_150288;F01_transcript_151006;F01_transcript_153285;F01_transcript_156200;F01_transcript_16838;F01_transcript_25903;F01_transcript_27710;F01_tr…
F01_transcript_109781	F01_transcript_127055
F01_transcript_153834	F01_transcript_102707;F01_transcript_104805;F01_transcript_105674;F01_transcript_106635;F01_transcript_108264;F01_transcript_109878;F01_transcript_110138;F01_transcript_112749;F01_transcript_114515;F01_transcript_116487;F01_transcript_117077;F01_transcript_121576;F01_transcript_121732;F01_transcript_121960;F01_transcript_122323;F01_transcript_123959;F01_transcript_126884;F01_transcript_131541;F01…
F01_transcript_140615	F01_transcript_35088
F01_transcript_114299	F01_transcript_100192;F01_transcript_101643;F01_transcript_104579;F01_transcript_105172;F01_transcript_105409;F01_transcript_105790;F01_transcript_105898;F01_transcript_105974;F01_transcript_107559;F01_transcript_108646;F01_transcript_109032;F01_transcript_109897;F01_transcript_110026;F01_transcript_112666;F01_transcript_112772;F01_transcript_114241;F01_transcript_115432;F01_transcript_116666;F01…
F01_transcript_61850	F01_transcript_100250;F01_transcript_101050;F01_transcript_102598;F01_transcript_102690;F01_transcript_105023;F01_transcript_106001;F01_transcript_106295;F01_transcript_106570;F01_transcript_109683;F01_transcript_111234;F01_transcript_124115;F01_transcript_126444;F01_transcript_127268;F01_transcript_127551;F01_transcript_128122;F01_transcript_128205;F01_transcript_13867;F01_transcript_139780;F01_…
F01_transcript_70660	F01_transcript_101398;F01_transcript_102897;F01_transcript_105001;F01_transcript_106348;F01_transcript_106451;F01_transcript_107282;F01_transcript_110843;F01_transcript_120575;F01_transcript_121008;F01_transcript_132329;F01_transcript_132614;F01_transcript_136452;F01_transcript_143018;F01_transcript_143536;F01_transcript_151201;F01_transcript_151458;F01_transcript_151597;F01_transcript_20549;F01_…
F01_transcript_132671	F01_transcript_101149;F01_transcript_101784;F01_transcript_105260;F01_transcript_107424;F01_transcript_109272;F01_transcript_111557;F01_transcript_113609;F01_transcript_116185;F01_transcript_119835;F01_transcript_125307;F01_transcript_125882;F01_transcript_126846;F01_transcript_130581;F01_transcript_133104;F01_transcript_13430;F01_transcript_134706;F01_transcript_138280;F01_transcript_148713;F01_…
F01_transcript_126626	F01_transcript_102627;F01_transcript_103220;F01_transcript_105853;F01_transcript_108407;F01_transcript_109807;F01_transcript_110658;F01_transcript_112703;F01_transcript_115534;F01_transcript_123182;F01_transcript_124822;F01_transcript_125614;F01_transcript_129348;F01_transcript_131002;F01_transcript_132858;F01_transcript_142714;F01_transcript_143639;F01_transcript_145064;F01_transcript_145271;F01…
F01_transcript_67683	F01_transcript_102138;F01_transcript_106752;F01_transcript_108864;F01_transcript_115715;F01_transcript_115844;F01_transcript_120325;F01_transcript_121689;F01_transcript_123251;F01_transcript_128408;F01_transcript_131577;F01_transcript_131763;F01_transcript_136088;F01_transcript_136658;F01_transcript_138774;F01_transcript_138864;F01_transcript_144832;F01_transcript_148200;F01_transcript_148819;F01…
F01_transcript_128548	F01_transcript_69327;F01_transcript_98301
F01_transcript_72397	F01_transcript_109931;F01_transcript_110031;F01_transcript_127988;F01_transcript_146076;F01_transcript_27623;F01_transcript_29516;F01_transcript_77056
F01_transcript_140671	F01_transcript_148441;F01_transcript_63505;F01_transcript_68295;F01_transcript_94255
F01_transcript_71178	F01_transcript_52843
F01_transcript_49569	F01_transcript_100370;F01_transcript_106096;F01_transcript_110026;F01_transcript_117678;F01_transcript_126920;F01_transcript_128650;F01_transcript_131902;F01_transcript_3711;F01_transcript_37504;F01_transcript_3840;F01_transcript_43578;F01_transcript_46963;F01_transcript_48785;F01_transcript_87524;F01_transcript_897;F01_transcript_9767
F01_transcript_115699	F01_transcript_105790;F01_transcript_112772;F01_transcript_114241;F01_transcript_118430;F01_transcript_120573;F01_transcript_12887;F01_transcript_131237;F01_transcript_147302;F01_transcript_155227;F01_transcript_18321;F01_transcript_20924;F01_transcript_21426;F01_transcript_23112;F01_transcript_27483;F01_transcript_29739;F01_transcript_32465;F01_transcript_33722;F01_transcript_36647;F01_transcrip…
F01_transcript_107190	F01_transcript_110930;F01_transcript_56980;F01_transcript_66925;F01_transcript_67123;F01_transcript_90860
F01_transcript_72061	F01_transcript_100513;F01_transcript_101906;F01_transcript_102707;F01_transcript_102717;F01_transcript_104805;F01_transcript_104899;F01_transcript_105674;F01_transcript_106635;F01_transcript_109878;F01_transcript_110138;F01_transcript_110846;F01_transcript_112749;F01_transcript_114515;F01_transcript_116487;F01_transcript_117077;F01_transcript_11832;F01_transcript_121576;F01_transcript_121732;F01_…
F01_transcript_146360	F01_transcript_101343;F01_transcript_102753;F01_transcript_104660;F01_transcript_107995;F01_transcript_109657;F01_transcript_116576;F01_transcript_117369;F01_transcript_117570;F01_transcript_118665;F01_transcript_121131;F01_transcript_127489;F01_transcript_129068;F01_transcript_130029;F01_transcript_132725;F01_transcript_140043;F01_transcript_140270;F01_transcript_151303;F01_transcript_152072;F01…
F01_transcript_122322	F01_transcript_102010;F01_transcript_108402;F01_transcript_111541;F01_transcript_115094;F01_transcript_115783;F01_transcript_118760;F01_transcript_120765;F01_transcript_121970;F01_transcript_125669;F01_transcript_126163;F01_transcript_128119;F01_transcript_128216;F01_transcript_131216;F01_transcript_139229;F01_transcript_139404;F01_transcript_14987;F01_transcript_155077;F01_transcript_19143;F01_t…
F01_transcript_150409	F01_transcript_101093;F01_transcript_102591;F01_transcript_103703;F01_transcript_103956;F01_transcript_106451;F01_transcript_107500;F01_transcript_107765;F01_transcript_113044;F01_transcript_113323;F01_transcript_119820;F01_transcript_120575;F01_transcript_130144;F01_transcript_132427;F01_transcript_135401;F01_transcript_136614;F01_transcript_139264;F01_transcript_144104;F01_transcript_145417;F01…
F01_transcript_129840	F01_transcript_101264;F01_transcript_101378;F01_transcript_102957;F01_transcript_113432;F01_transcript_114588;F01_transcript_116357;F01_transcript_119189;F01_transcript_133535;F01_transcript_36449;F01_transcript_38189;F01_transcript_45727;F01_transcript_46222;F01_transcript_47372;F01_transcript_47390;F01_transcript_47489;F01_transcript_48031;F01_transcript_48403;F01_transcript_48557;F01_transcrip…
F01_transcript_88811	F01_transcript_112740;F01_transcript_125001;F01_transcript_127053;F01_transcript_131022;F01_transcript_131811;F01_transcript_150219;F01_transcript_150357;F01_transcript_18653;F01_transcript_29318;F01_transcript_47142;F01_transcript_49023;F01_transcript_5406;F01_transcript_59283;F01_transcript_61081;F01_transcript_61311;F01_transcript_61810;F01_transcript_62275;F01_transcript_95929;F01_transcript_…
F01_transcript_106394	F01_transcript_132338;F01_transcript_135795;F01_transcript_140455;F01_transcript_289
F01_transcript_146967	F01_transcript_64502
F01_transcript_64362	F01_transcript_100057;F01_transcript_101574;F01_transcript_101998;F01_transcript_102482;F01_transcript_10283;F01_transcript_103173;F01_transcript_103925;F01_transcript_105322;F01_transcript_105441;F01_transcript_106108;F01_transcript_107521;F01_transcript_108018;F01_transcript_108402;F01_transcript_108763;F01_transcript_109109;F01_transcript_10913;F01_transcript_109742;F01_transcript_111289;F01_t…
F01_transcript_146483	F01_transcript_108156;F01_transcript_110647;F01_transcript_115022;F01_transcript_116335;F01_transcript_118804;F01_transcript_119317;F01_transcript_127055;F01_transcript_128161;F01_transcript_25014;F01_transcript_51215;F01_transcript_58114;F01_transcript_59759;F01_transcript_63086;F01_transcript_67572;F01_transcript_85715;F01_transcript_91936;F01_transcript_96429
F01_transcript_110895	F01_transcript_118127;F01_transcript_126912;F01_transcript_37055;F01_transcript_68924
F01_transcript_109872	F01_transcript_101822;F01_transcript_103956;F01_transcript_108156;F01_transcript_111583;F01_transcript_115022;F01_transcript_119820;F01_transcript_121640;F01_transcript_125657;F01_transcript_126553;F01_transcript_127055;F01_transcript_134130;F01_transcript_139264;F01_transcript_144104;F01_transcript_150313;F01_transcript_151503;F01_transcript_151700;F01_transcript_17724;F01_transcript_22068;F01_t…
F01_transcript_121677	F01_transcript_101413;F01_transcript_104459;F01_transcript_113317;F01_transcript_140185;F01_transcript_142218;F01_transcript_144714;F01_transcript_154919;F01_transcript_32052;F01_transcript_36722;F01_transcript_39734;F01_transcript_42097;F01_transcript_44268;F01_transcript_44523;F01_transcript_46839;F01_transcript_46878;F01_transcript_47135;F01_transcript_47341;F01_transcript_48252;F01_transcript…
F01_transcript_77540	F01_transcript_104274;F01_transcript_105493;F01_transcript_107101;F01_transcript_107345;F01_transcript_107883;F01_transcript_109242;F01_transcript_109796;F01_transcript_112859;F01_transcript_115618;F01_transcript_117992;F01_transcript_119990;F01_transcript_120319;F01_transcript_121885;F01_transcript_125057;F01_transcript_127596;F01_transcript_127685;F01_transcript_128489;F01_transcript_130505;F01…
F01_transcript_76437	F01_transcript_49239;F01_transcript_80406;F01_transcript_94286
F01_transcript_61757	F01_transcript_102291;F01_transcript_102659;F01_transcript_10302;F01_transcript_104370;F01_transcript_105594;F01_transcript_106053;F01_transcript_106496;F01_transcript_107883;F01_transcript_11353;F01_transcript_115898;F01_transcript_116161;F01_transcript_11630;F01_transcript_117371;F01_transcript_120166;F01_transcript_121172;F01_transcript_122275;F01_transcript_1234;F01_transcript_12438;F01_trans…
F01_transcript_136487	F01_transcript_107269;F01_transcript_17133;F01_transcript_23717;F01_transcript_26685;F01_transcript_33186
F01_transcript_75494	F01_transcript_100591;F01_transcript_112638;F01_transcript_12887;F01_transcript_16811;F01_transcript_20924;F01_transcript_21426;F01_transcript_37063;F01_transcript_37860;F01_transcript_46851;F01_transcript_60817
F01_transcript_63295	F01_transcript_100969;F01_transcript_101394;F01_transcript_103106;F01_transcript_110594;F01_transcript_116847;F01_transcript_120284;F01_transcript_123219;F01_transcript_136133;F01_transcript_141537;F01_transcript_142658;F01_transcript_143593;F01_transcript_144930;F01_transcript_145871;F01_transcript_146571;F01_transcript_151859;F01_transcript_154714;F01_transcript_25509;F01_transcript_3064;F01_tr…
F01_transcript_143012	F01_transcript_105562;F01_transcript_105644;F01_transcript_107541;F01_transcript_108349;F01_transcript_112256;F01_transcript_124898;F01_transcript_132292;F01_transcript_133107;F01_transcript_134281;F01_transcript_135285;F01_transcript_16427;F01_transcript_21908;F01_transcript_62465;F01_transcript_75205;F01_transcript_82403;F01_transcript_83826;F01_transcript_85542;F01_transcript_87686;F01_transcr…
F01_transcript_121105	F01_transcript_102116;F01_transcript_107184;F01_transcript_1102;F01_transcript_110641;F01_transcript_111120;F01_transcript_113473;F01_transcript_113914;F01_transcript_117015;F01_transcript_13197;F01_transcript_134098;F01_transcript_135580;F01_transcript_138628;F01_transcript_142064;F01_transcript_144294;F01_transcript_149494;F01_transcript_150838;F01_transcript_154807;F01_transcript_18950;F01_tra…
F01_transcript_53604	F01_transcript_105790;F01_transcript_122039;F01_transcript_130470;F01_transcript_131705;F01_transcript_134844;F01_transcript_1407;F01_transcript_140854;F01_transcript_149897;F01_transcript_152098;F01_transcript_1779;F01_transcript_25572;F01_transcript_25972;F01_transcript_30404;F01_transcript_38059;F01_transcript_38747;F01_transcript_40121;F01_transcript_42975;F01_transcript_43617;F01_transcript_…
F01_transcript_100349	F01_transcript_102627;F01_transcript_103220;F01_transcript_105853;F01_transcript_108407;F01_transcript_109807;F01_transcript_110658;F01_transcript_112703;F01_transcript_123182;F01_transcript_124822;F01_transcript_125614;F01_transcript_129348;F01_transcript_131002;F01_transcript_132858;F01_transcript_142714;F01_transcript_143639;F01_transcript_145064;F01_transcript_145271;F01_transcript_146045;F01…
F01_transcript_138267	F01_transcript_100908;F01_transcript_101398;F01_transcript_105801;F01_transcript_106348;F01_transcript_108532;F01_transcript_109455;F01_transcript_110647;F01_transcript_111304;F01_transcript_112970;F01_transcript_113663;F01_transcript_116335;F01_transcript_117660;F01_transcript_118804;F01_transcript_119317;F01_transcript_122537;F01_transcript_122705;F01_transcript_123547;F01_transcript_124679;F01…
F01_transcript_52302	F01_transcript_100138;F01_transcript_100575;F01_transcript_101776;F01_transcript_103953;F01_transcript_104592;F01_transcript_105449;F01_transcript_105741;F01_transcript_106602;F01_transcript_106771;F01_transcript_107462;F01_transcript_108209;F01_transcript_111054;F01_transcript_111102;F01_transcript_112136;F01_transcript_112405;F01_transcript_113032;F01_transcript_114504;F01_transcript_114663;F01…
F01_transcript_137404	F01_transcript_78883
F01_transcript_52504	F01_transcript_52835
F01_transcript_48600	F01_transcript_100107;F01_transcript_100192;F01_transcript_100923;F01_transcript_1040;F01_transcript_104579;F01_transcript_105172;F01_transcript_10519;F01_transcript_105409;F01_transcript_105790;F01_transcript_105974;F01_transcript_106399;F01_transcript_109032;F01_transcript_111860;F01_transcript_111877;F01_transcript_112666;F01_transcript_114144;F01_transcript_114813;F01_transcript_114848;F01_tr…
F01_transcript_75767	F01_transcript_66925;F01_transcript_90860
F01_transcript_54867	F01_transcript_111950
F01_transcript_90864	F01_transcript_101125;F01_transcript_106651;F01_transcript_106828;F01_transcript_109201;F01_transcript_125188;F01_transcript_125303;F01_transcript_125492;F01_transcript_126651;F01_transcript_128505;F01_transcript_134143;F01_transcript_134298;F01_transcript_134669;F01_transcript_137681;F01_transcript_140148;F01_transcript_141304;F01_transcript_149625;F01_transcript_152217;F01_transcript_153348;F01…
F01_transcript_135885	F01_transcript_125551;F01_transcript_73867;F01_transcript_96603
F01_transcript_48619	F01_transcript_100437;F01_transcript_100728;F01_transcript_100812;F01_transcript_10088;F01_transcript_101753;F01_transcript_102291;F01_transcript_102659;F01_transcript_102792;F01_transcript_10302;F01_transcript_104875;F01_transcript_105286;F01_transcript_105472;F01_transcript_105493;F01_transcript_105594;F01_transcript_106053;F01_transcript_107345;F01_transcript_107605;F01_transcript_107631;F01_t…
F01_transcript_115018	F01_transcript_105957;F01_transcript_115953;F01_transcript_123509;F01_transcript_123815;F01_transcript_13183;F01_transcript_138268;F01_transcript_143080;F01_transcript_19600;F01_transcript_21168;F01_transcript_22348;F01_transcript_22721;F01_transcript_22870;F01_transcript_24230;F01_transcript_24628;F01_transcript_27871;F01_transcript_32193;F01_transcript_35538;F01_transcript_37756;F01_transcript_…
F01_transcript_126043	F01_transcript_76421;F01_transcript_84768
F01_transcript_82653	F01_transcript_107830;F01_transcript_150283;F01_transcript_156;F01_transcript_15979;F01_transcript_22039;F01_transcript_22525;F01_transcript_27149;F01_transcript_4779;F01_transcript_63377;F01_transcript_64649;F01_transcript_80522
F01_transcript_150790	F01_transcript_104833;F01_transcript_106428;F01_transcript_108325;F01_transcript_108480;F01_transcript_119039;F01_transcript_122802;F01_transcript_1245;F01_transcript_12853;F01_transcript_13153;F01_transcript_134651;F01_transcript_15175;F01_transcript_153144;F01_transcript_156088;F01_transcript_20296;F01_transcript_22444;F01_transcript_25572;F01_transcript_26065;F01_transcript_27665;F01_transcrip…
F01_transcript_111721	F01_transcript_118222;F01_transcript_59247
F01_transcript_13977	F01_transcript_136295;F01_transcript_3953
F01_transcript_78431	F01_transcript_120776;F01_transcript_71546;F01_transcript_7462
F01_transcript_116311	F01_transcript_101234;F01_transcript_87172
F01_transcript_149424	F01_transcript_100868;F01_transcript_101828;F01_transcript_105690;F01_transcript_111698;F01_transcript_115084;F01_transcript_120237;F01_transcript_123094;F01_transcript_127300;F01_transcript_129865;F01_transcript_143595;F01_transcript_143949;F01_transcript_150355;F01_transcript_151465;F01_transcript_153694;F01_transcript_155217;F01_transcript_19019;F01_transcript_20546;F01_transcript_23769;F01_tr…
F01_transcript_60730	F01_transcript_128823
F01_transcript_92500	F01_transcript_38685;F01_transcript_44902;F01_transcript_45343;F01_transcript_73249;F01_transcript_92843
F01_transcript_68761	F01_transcript_110710;F01_transcript_123361;F01_transcript_143427;F01_transcript_150385;F01_transcript_151543;F01_transcript_55204;F01_transcript_68412;F01_transcript_71392;F01_transcript_75505;F01_transcript_77886;F01_transcript_82718;F01_transcript_86140;F01_transcript_93813;F01_transcript_94130;F01_transcript_94800
F01_transcript_136833	F01_transcript_65676;F01_transcript_66934
F01_transcript_147811	F01_transcript_134199
F01_transcript_52412	F01_transcript_100232;F01_transcript_101338;F01_transcript_102910;F01_transcript_102929;F01_transcript_102971;F01_transcript_103638;F01_transcript_103760;F01_transcript_104131;F01_transcript_104449;F01_transcript_104817;F01_transcript_104858;F01_transcript_105261;F01_transcript_105929;F01_transcript_106136;F01_transcript_106274;F01_transcript_106556;F01_transcript_10656;F01_transcript_107956;F01_…
F01_transcript_113489	F01_transcript_121756;F01_transcript_129856;F01_transcript_18321;F01_transcript_20873;F01_transcript_31108;F01_transcript_39968
F01_transcript_53810	F01_transcript_107891;F01_transcript_110059;F01_transcript_128427;F01_transcript_129375;F01_transcript_141349;F01_transcript_144517;F01_transcript_147563;F01_transcript_152086;F01_transcript_152437;F01_transcript_17206;F01_transcript_34499;F01_transcript_47656;F01_transcript_51210;F01_transcript_51215;F01_transcript_59759;F01_transcript_62403;F01_transcript_63379;F01_transcript_70477;F01_transcri…
F01_transcript_92378	F01_transcript_101110;F01_transcript_102882;F01_transcript_108546;F01_transcript_108692;F01_transcript_112160;F01_transcript_116222;F01_transcript_120409;F01_transcript_132110;F01_transcript_138287;F01_transcript_14221;F01_transcript_148049;F01_transcript_152590;F01_transcript_156113;F01_transcript_20639;F01_transcript_26366;F01_transcript_29524;F01_transcript_35935;F01_transcript_36682;F01_trans…
F01_transcript_80110	F01_transcript_100015;F01_transcript_100532;F01_transcript_101195;F01_transcript_104451;F01_transcript_105434;F01_transcript_107413;F01_transcript_109309;F01_transcript_114000;F01_transcript_119376;F01_transcript_119696;F01_transcript_121202;F01_transcript_125116;F01_transcript_133498;F01_transcript_137441;F01_transcript_138538;F01_transcript_142856;F01_transcript_151377;F01_transcript_154753;F01…
F01_transcript_76593	F01_transcript_101179;F01_transcript_102500;F01_transcript_103240;F01_transcript_107594;F01_transcript_107811;F01_transcript_108017;F01_transcript_111127;F01_transcript_112946;F01_transcript_113413;F01_transcript_113865;F01_transcript_114137;F01_transcript_118343;F01_transcript_123057;F01_transcript_125771;F01_transcript_128083;F01_transcript_130570;F01_transcript_135988;F01_transcript_137505;F01…
F01_transcript_83150	F01_transcript_100513;F01_transcript_101906;F01_transcript_102707;F01_transcript_102717;F01_transcript_104805;F01_transcript_104899;F01_transcript_105674;F01_transcript_106635;F01_transcript_109878;F01_transcript_110138;F01_transcript_110846;F01_transcript_112749;F01_transcript_114515;F01_transcript_116487;F01_transcript_117077;F01_transcript_11832;F01_transcript_121576;F01_transcript_121732;F01_…
F01_transcript_69432	F01_transcript_107906
F01_transcript_117838	F01_transcript_23744;F01_transcript_32052;F01_transcript_37430;F01_transcript_52361;F01_transcript_97774
F01_transcript_134196	F01_transcript_134199
F01_transcript_119442	F01_transcript_48931
F01_transcript_60090	F01_transcript_100354;F01_transcript_101974;F01_transcript_102310;F01_transcript_102401;F01_transcript_104161;F01_transcript_104568;F01_transcript_104627;F01_transcript_104997;F01_transcript_106204;F01_transcript_106930;F01_transcript_108068;F01_transcript_108318;F01_transcript_111346;F01_transcript_113026;F01_transcript_113198;F01_transcript_113318;F01_transcript_113364;F01_transcript_113730;F01…
F01_transcript_71372	F01_transcript_150341;F01_transcript_93791
F01_transcript_145195	F01_transcript_123832
F01_transcript_29533	F01_transcript_106495;F01_transcript_124887;F01_transcript_129168;F01_transcript_151694;F01_transcript_7254
F01_transcript_148043	F01_transcript_100847;F01_transcript_101801;F01_transcript_102116;F01_transcript_102127;F01_transcript_102268;F01_transcript_103447;F01_transcript_106135;F01_transcript_107184;F01_transcript_10865;F01_transcript_108968;F01_transcript_1102;F01_transcript_110641;F01_transcript_112047;F01_transcript_11222;F01_transcript_113473;F01_transcript_113914;F01_transcript_114410;F01_transcript_117015;F01_tra…
F01_transcript_50244	F01_transcript_100809;F01_transcript_105001;F01_transcript_107235;F01_transcript_113366;F01_transcript_121002;F01_transcript_126077;F01_transcript_12940;F01_transcript_132329;F01_transcript_134090;F01_transcript_153856;F01_transcript_15724;F01_transcript_34838;F01_transcript_52620;F01_transcript_58430;F01_transcript_65412;F01_transcript_70162;F01_transcript_73835;F01_transcript_73918;F01_transcri…
F01_transcript_74353	F01_transcript_104571;F01_transcript_108715;F01_transcript_110957;F01_transcript_114904;F01_transcript_120535;F01_transcript_135464;F01_transcript_135718;F01_transcript_137875;F01_transcript_143364;F01_transcript_143466;F01_transcript_145452;F01_transcript_145835;F01_transcript_148471;F01_transcript_152380;F01_transcript_15485;F01_transcript_155046;F01_transcript_155638;F01_transcript_42018;F01_t…
F01_transcript_103810	F01_transcript_106676;F01_transcript_107838;F01_transcript_111291;F01_transcript_111776;F01_transcript_114283;F01_transcript_126409;F01_transcript_126882;F01_transcript_127355;F01_transcript_130833;F01_transcript_136760;F01_transcript_146008;F01_transcript_146278;F01_transcript_155392;F01_transcript_155446;F01_transcript_15866;F01_transcript_16606;F01_transcript_17095;F01_transcript_18277;F01_tra…
F01_transcript_73937	F01_transcript_100067;F01_transcript_100232;F01_transcript_100601;F01_transcript_101413;F01_transcript_101783;F01_transcript_102240;F01_transcript_102532;F01_transcript_102813;F01_transcript_102957;F01_transcript_103375;F01_transcript_10354;F01_transcript_104131;F01_transcript_104274;F01_transcript_104459;F01_transcript_10479;F01_transcript_104858;F01_transcript_105243;F01_transcript_105493;F01_t…
F01_transcript_54595	F01_transcript_102627;F01_transcript_103220;F01_transcript_105853;F01_transcript_108407;F01_transcript_109807;F01_transcript_110658;F01_transcript_112703;F01_transcript_123182;F01_transcript_124822;F01_transcript_125614;F01_transcript_129348;F01_transcript_131002;F01_transcript_132858;F01_transcript_142714;F01_transcript_143639;F01_transcript_145064;F01_transcript_145271;F01_transcript_146045;F01…
F01_transcript_135110	F01_transcript_111340
F01_transcript_118622	F01_transcript_106612;F01_transcript_108982;F01_transcript_114831;F01_transcript_115031;F01_transcript_121039;F01_transcript_124350;F01_transcript_132840;F01_transcript_15657;F01_transcript_21163;F01_transcript_2277;F01_transcript_22795;F01_transcript_25990;F01_transcript_29957;F01_transcript_33178;F01_transcript_33298;F01_transcript_33457;F01_transcript_36247;F01_transcript_37109;F01_transcript_…
F01_transcript_58529	F01_transcript_143204
F01_transcript_46043	F01_transcript_105790;F01_transcript_121756;F01_transcript_122039;F01_transcript_12363;F01_transcript_139599;F01_transcript_18321;F01_transcript_20873;F01_transcript_21890;F01_transcript_23112;F01_transcript_24229;F01_transcript_25572;F01_transcript_27483;F01_transcript_29739;F01_transcript_31597;F01_transcript_32465;F01_transcript_34473;F01_transcript_38977;F01_transcript_39968;F01_transcript_43…
F01_transcript_102841	F01_transcript_10663;F01_transcript_144939;F01_transcript_53144;F01_transcript_64775;F01_transcript_65930;F01_transcript_66388;F01_transcript_81444;F01_transcript_95144
F01_transcript_113928	F01_transcript_1103;F01_transcript_112758;F01_transcript_152511;F01_transcript_2853;F01_transcript_57477;F01_transcript_66724;F01_transcript_78548;F01_transcript_79399;F01_transcript_96284;F01_transcript_96706;F01_transcript_96966
F01_transcript_121288	F01_transcript_10000;F01_transcript_100057;F01_transcript_100947;F01_transcript_101574;F01_transcript_101632;F01_transcript_101998;F01_transcript_102159;F01_transcript_102482;F01_transcript_10283;F01_transcript_103173;F01_transcript_103925;F01_transcript_105989;F01_transcript_106251;F01_transcript_106681;F01_transcript_107521;F01_transcript_107602;F01_transcript_108018;F01_transcript_108077;F01_t…
F01_transcript_55792	F01_transcript_100459;F01_transcript_101966;F01_transcript_101997;F01_transcript_102964;F01_transcript_103735;F01_transcript_103801;F01_transcript_105097;F01_transcript_105112;F01_transcript_105227;F01_transcript_105556;F01_transcript_105732;F01_transcript_105841;F01_transcript_105898;F01_transcript_106320;F01_transcript_106389;F01_transcript_107527;F01_transcript_107777;F01_transcript_107885;F01…
F01_transcript_142453	F01_transcript_56217
F01_transcript_149440	F01_transcript_142664;F01_transcript_69594
F01_transcript_148359	F01_transcript_140678;F01_transcript_60529;F01_transcript_75952;F01_transcript_91573
F01_transcript_152742	F01_transcript_101125;F01_transcript_106651;F01_transcript_106828;F01_transcript_109201;F01_transcript_125188;F01_transcript_125303;F01_transcript_125492;F01_transcript_126651;F01_transcript_128505;F01_transcript_134143;F01_transcript_134298;F01_transcript_134669;F01_transcript_137681;F01_transcript_140148;F01_transcript_141304;F01_transcript_149625;F01_transcript_152217;F01_transcript_153348;F01…
F01_transcript_86777	F01_transcript_100057;F01_transcript_101998;F01_transcript_102482;F01_transcript_10283;F01_transcript_103039;F01_transcript_103925;F01_transcript_108402;F01_transcript_109742;F01_transcript_111289;F01_transcript_111541;F01_transcript_112243;F01_transcript_112740;F01_transcript_114233;F01_transcript_114237;F01_transcript_115094;F01_transcript_117974;F01_transcript_118627;F01_transcript_11886;F01_t…
F01_transcript_54580	F01_transcript_101631;F01_transcript_103818;F01_transcript_104035;F01_transcript_106371;F01_transcript_107530;F01_transcript_11098;F01_transcript_113471;F01_transcript_114300;F01_transcript_115590;F01_transcript_116306;F01_transcript_117976;F01_transcript_125013;F01_transcript_127598;F01_transcript_133573;F01_transcript_134572;F01_transcript_138438;F01_transcript_140074;F01_transcript_140403;F01_…
F01_transcript_72910	F01_transcript_104274;F01_transcript_109242;F01_transcript_115067;F01_transcript_121885;F01_transcript_27692;F01_transcript_48340;F01_transcript_49782;F01_transcript_52157;F01_transcript_52297;F01_transcript_53096;F01_transcript_62553;F01_transcript_73445;F01_transcript_76286;F01_transcript_76918;F01_transcript_98408
F01_transcript_52883	F01_transcript_101081;F01_transcript_101416;F01_transcript_101430;F01_transcript_101592;F01_transcript_101911;F01_transcript_102527;F01_transcript_104819;F01_transcript_105694;F01_transcript_106261;F01_transcript_106416;F01_transcript_106973;F01_transcript_107369;F01_transcript_108314;F01_transcript_108322;F01_transcript_108843;F01_transcript_109299;F01_transcript_110416;F01_transcript_111117;F01…
F01_transcript_129713	F01_transcript_110878;F01_transcript_111214;F01_transcript_118588;F01_transcript_119414;F01_transcript_119535;F01_transcript_122415;F01_transcript_123155;F01_transcript_128446;F01_transcript_135775;F01_transcript_137241;F01_transcript_137431;F01_transcript_138754;F01_transcript_140215;F01_transcript_143766;F01_transcript_147237;F01_transcript_151942;F01_transcript_154009;F01_transcript_154229;F01…
F01_transcript_95355	F01_transcript_100357;F01_transcript_101706;F01_transcript_102229;F01_transcript_102420;F01_transcript_104088;F01_transcript_109743;F01_transcript_112534;F01_transcript_114455;F01_transcript_114962;F01_transcript_119637;F01_transcript_120114;F01_transcript_121790;F01_transcript_125543;F01_transcript_127377;F01_transcript_129191;F01_transcript_130414;F01_transcript_132239;F01_transcript_133340;F01…
F01_transcript_90142	F01_transcript_101544;F01_transcript_101631;F01_transcript_101646;F01_transcript_102191;F01_transcript_104035;F01_transcript_104405;F01_transcript_104561;F01_transcript_104642;F01_transcript_107014;F01_transcript_107179;F01_transcript_107530;F01_transcript_108411;F01_transcript_109036;F01_transcript_109293;F01_transcript_109719;F01_transcript_109984;F01_transcript_111723;F01_transcript_111945;F01…
F01_transcript_70233	F01_transcript_100333;F01_transcript_101774;F01_transcript_103297;F01_transcript_103424;F01_transcript_103448;F01_transcript_105695;F01_transcript_105816;F01_transcript_112265;F01_transcript_113684;F01_transcript_114287;F01_transcript_123895;F01_transcript_123906;F01_transcript_125421;F01_transcript_128260;F01_transcript_133426;F01_transcript_134247;F01_transcript_140677;F01_transcript_140873;F01…
F01_transcript_133692	F01_transcript_100908;F01_transcript_105001;F01_transcript_105801;F01_transcript_106348;F01_transcript_107235;F01_transcript_109324;F01_transcript_109682;F01_transcript_113663;F01_transcript_120864;F01_transcript_121002;F01_transcript_125514;F01_transcript_126077;F01_transcript_129322;F01_transcript_12940;F01_transcript_130055;F01_transcript_132329;F01_transcript_133554;F01_transcript_136452;F01_…
F01_transcript_125243	F01_transcript_57475
F01_transcript_53834	F01_transcript_112836;F01_transcript_126842;F01_transcript_145953;F01_transcript_55546;F01_transcript_63703;F01_transcript_73994
F01_transcript_78693	F01_transcript_107488;F01_transcript_107813;F01_transcript_108500;F01_transcript_110328;F01_transcript_111062;F01_transcript_111138;F01_transcript_113822;F01_transcript_114188;F01_transcript_115647;F01_transcript_116250;F01_transcript_120682;F01_transcript_120830;F01_transcript_124101;F01_transcript_124638;F01_transcript_125540;F01_transcript_127341;F01_transcript_131035;F01_transcript_131282;F01…
F01_transcript_141919	F01_transcript_100432;F01_transcript_105795;F01_transcript_106159;F01_transcript_107186;F01_transcript_115005;F01_transcript_117257;F01_transcript_120632;F01_transcript_124197;F01_transcript_124362;F01_transcript_125353;F01_transcript_126302;F01_transcript_129082;F01_transcript_133072;F01_transcript_135640;F01_transcript_13582;F01_transcript_142819;F01_transcript_145478;F01_transcript_145894;F01_…
F01_transcript_156188	F01_transcript_107714;F01_transcript_123803;F01_transcript_152564;F01_transcript_152862;F01_transcript_155345;F01_transcript_31732;F01_transcript_59199;F01_transcript_7257
F01_transcript_148558	F01_transcript_105974;F01_transcript_106096;F01_transcript_107262;F01_transcript_109500;F01_transcript_11045;F01_transcript_112772;F01_transcript_116107;F01_transcript_116189;F01_transcript_117678;F01_transcript_11827;F01_transcript_120573;F01_transcript_123346;F01_transcript_131902;F01_transcript_13455;F01_transcript_135544;F01_transcript_138948;F01_transcript_139903;F01_transcript_140794;F01_tr…
F01_transcript_54395	F01_transcript_100354;F01_transcript_101974;F01_transcript_102310;F01_transcript_102401;F01_transcript_104161;F01_transcript_104568;F01_transcript_104627;F01_transcript_104997;F01_transcript_106930;F01_transcript_108068;F01_transcript_108318;F01_transcript_111346;F01_transcript_113026;F01_transcript_113198;F01_transcript_113318;F01_transcript_113364;F01_transcript_113730;F01_transcript_113741;F01…
F01_transcript_96053	F01_transcript_126294;F01_transcript_129145;F01_transcript_146134;F01_transcript_76421;F01_transcript_81458;F01_transcript_95778
F01_transcript_62264	F01_transcript_101613;F01_transcript_104439;F01_transcript_116515;F01_transcript_116720;F01_transcript_122039;F01_transcript_12496;F01_transcript_125786;F01_transcript_134531;F01_transcript_139599;F01_transcript_140742;F01_transcript_140854;F01_transcript_144986;F01_transcript_149603;F01_transcript_152098;F01_transcript_153428;F01_transcript_153989;F01_transcript_155831;F01_transcript_18321;F01_t…
F01_transcript_101351	F01_transcript_100847;F01_transcript_104912;F01_transcript_106109;F01_transcript_108968;F01_transcript_110451;F01_transcript_112047;F01_transcript_11222;F01_transcript_113473;F01_transcript_113914;F01_transcript_114077;F01_transcript_114410;F01_transcript_115993;F01_transcript_116006;F01_transcript_119484;F01_transcript_120456;F01_transcript_123266;F01_transcript_12348;F01_transcript_124391;F01_t…
F01_transcript_119424	F01_transcript_116964;F01_transcript_132381;F01_transcript_135103;F01_transcript_23781;F01_transcript_31198
F01_transcript_126977	F01_transcript_100397;F01_transcript_100414;F01_transcript_100429;F01_transcript_101081;F01_transcript_101416;F01_transcript_101430;F01_transcript_101592;F01_transcript_101636;F01_transcript_101900;F01_transcript_101911;F01_transcript_102341;F01_transcript_102527;F01_transcript_102555;F01_transcript_103329;F01_transcript_103730;F01_transcript_10391;F01_transcript_103963;F01_transcript_104773;F01_…
F01_transcript_3992	F01_transcript_10876;F01_transcript_11827;F01_transcript_121666;F01_transcript_12887;F01_transcript_131902;F01_transcript_135544;F01_transcript_139903;F01_transcript_148031;F01_transcript_148824;F01_transcript_16811;F01_transcript_17628;F01_transcript_2971;F01_transcript_30159;F01_transcript_38977;F01_transcript_41251;F01_transcript_5059;F01_transcript_57477;F01_transcript_6273;F01_transcript_667…
F01_transcript_55686	F01_transcript_25849;F01_transcript_44884
F01_transcript_117417	F01_transcript_125353;F01_transcript_135640;F01_transcript_65894
F01_transcript_131586	F01_transcript_100107;F01_transcript_100192;F01_transcript_100342;F01_transcript_100923;F01_transcript_101535;F01_transcript_101874;F01_transcript_103525;F01_transcript_1040;F01_transcript_104439;F01_transcript_104572;F01_transcript_104579;F01_transcript_104776;F01_transcript_105172;F01_transcript_105409;F01_transcript_105411;F01_transcript_105556;F01_transcript_105790;F01_transcript_105898;F01_t…
F01_transcript_53531	F01_transcript_104218;F01_transcript_149591
F01_transcript_71661	F01_transcript_112606;F01_transcript_47133;F01_transcript_52139
F01_transcript_124275	F01_transcript_100015;F01_transcript_100532;F01_transcript_101195;F01_transcript_104451;F01_transcript_105434;F01_transcript_107413;F01_transcript_109309;F01_transcript_114000;F01_transcript_119376;F01_transcript_119696;F01_transcript_121202;F01_transcript_125116;F01_transcript_133498;F01_transcript_137441;F01_transcript_138538;F01_transcript_142856;F01_transcript_151377;F01_transcript_154753;F01…
F01_transcript_86819	F01_transcript_104833;F01_transcript_105702;F01_transcript_106428;F01_transcript_121192;F01_transcript_12363;F01_transcript_137460;F01_transcript_154274;F01_transcript_156088;F01_transcript_22444;F01_transcript_25398;F01_transcript_25421;F01_transcript_28462;F01_transcript_33153;F01_transcript_34383;F01_transcript_34812;F01_transcript_36217;F01_transcript_37627;F01_transcript_39277;F01_transcript…
F01_transcript_60421	F01_transcript_104939;F01_transcript_121700;F01_transcript_140302
F01_transcript_135052	F01_transcript_105118;F01_transcript_113270;F01_transcript_137522;F01_transcript_141469;F01_transcript_40171;F01_transcript_47130;F01_transcript_48234;F01_transcript_62702;F01_transcript_97368
F01_transcript_123138	F01_transcript_112119;F01_transcript_131542;F01_transcript_46123;F01_transcript_87875
F01_transcript_102103	F01_transcript_109200;F01_transcript_129838;F01_transcript_149963
F01_transcript_15391	F01_transcript_100863;F01_transcript_100969;F01_transcript_101394;F01_transcript_101874;F01_transcript_102678;F01_transcript_102753;F01_transcript_105151;F01_transcript_106162;F01_transcript_106759;F01_transcript_10702;F01_transcript_107756;F01_transcript_107896;F01_transcript_108610;F01_transcript_109400;F01_transcript_109795;F01_transcript_109980;F01_transcript_110594;F01_transcript_110965;F01_…
F01_transcript_129730	F01_transcript_101997;F01_transcript_103221;F01_transcript_104422;F01_transcript_105097;F01_transcript_105732;F01_transcript_112059;F01_transcript_112931;F01_transcript_115455;F01_transcript_116720;F01_transcript_118835;F01_transcript_12585;F01_transcript_135578;F01_transcript_144392;F01_transcript_145020;F01_transcript_148397;F01_transcript_149192;F01_transcript_15073;F01_transcript_15380;F01_tr…
F01_transcript_121748	F01_transcript_72456
F01_transcript_81545	F01_transcript_100028;F01_transcript_100666;F01_transcript_100693;F01_transcript_101559;F01_transcript_102813;F01_transcript_102971;F01_transcript_103641;F01_transcript_103971;F01_transcript_104131;F01_transcript_104858;F01_transcript_104929;F01_transcript_105690;F01_transcript_105791;F01_transcript_106365;F01_transcript_107064;F01_transcript_107150;F01_transcript_107596;F01_transcript_1078;F01_t…
F01_transcript_71889	F01_transcript_100479;F01_transcript_101201;F01_transcript_108098;F01_transcript_110250;F01_transcript_110930;F01_transcript_111316;F01_transcript_113398;F01_transcript_114523;F01_transcript_114859;F01_transcript_115184;F01_transcript_115807;F01_transcript_117700;F01_transcript_120294;F01_transcript_122387;F01_transcript_123218;F01_transcript_123800;F01_transcript_124854;F01_transcript_126251;F01…
F01_transcript_71730	F01_transcript_105591;F01_transcript_132736;F01_transcript_69295
F01_transcript_153124	F01_transcript_10000;F01_transcript_100033;F01_transcript_101998;F01_transcript_10283;F01_transcript_103087;F01_transcript_103143;F01_transcript_103173;F01_transcript_103925;F01_transcript_104524;F01_transcript_105144;F01_transcript_105322;F01_transcript_106466;F01_transcript_107326;F01_transcript_107602;F01_transcript_108009;F01_transcript_108018;F01_transcript_108763;F01_transcript_111024;F01_t…
F01_transcript_53047	F01_transcript_100107;F01_transcript_100342;F01_transcript_100863;F01_transcript_100969;F01_transcript_101874;F01_transcript_102437;F01_transcript_102678;F01_transcript_102715;F01_transcript_104502;F01_transcript_105002;F01_transcript_105039;F01_transcript_105151;F01_transcript_105898;F01_transcript_106399;F01_transcript_106435;F01_transcript_107029;F01_transcript_107896;F01_transcript_108668;F01…
F01_transcript_75261	F01_transcript_107377;F01_transcript_113687;F01_transcript_62229
F01_transcript_106854	F01_transcript_141438;F01_transcript_142072;F01_transcript_149963
F01_transcript_130089	F01_transcript_3337;F01_transcript_43837;F01_transcript_48393;F01_transcript_48556
F01_transcript_131118	F01_transcript_12504;F01_transcript_126553
F01_transcript_54196	F01_transcript_100432;F01_transcript_105795;F01_transcript_106159;F01_transcript_107186;F01_transcript_115005;F01_transcript_117257;F01_transcript_120632;F01_transcript_124197;F01_transcript_124362;F01_transcript_125353;F01_transcript_126302;F01_transcript_129082;F01_transcript_133072;F01_transcript_135640;F01_transcript_13582;F01_transcript_142819;F01_transcript_145478;F01_transcript_145894;F01_…
F01_transcript_135111	F01_transcript_18617;F01_transcript_51200
F01_transcript_154519	F01_transcript_10000;F01_transcript_101998;F01_transcript_10283;F01_transcript_103143;F01_transcript_103173;F01_transcript_103925;F01_transcript_104524;F01_transcript_105144;F01_transcript_105322;F01_transcript_106668;F01_transcript_108018;F01_transcript_108763;F01_transcript_111024;F01_transcript_112243;F01_transcript_112740;F01_transcript_115094;F01_transcript_117886;F01_transcript_11792;F01_tr…
F01_transcript_52089	F01_transcript_35433;F01_transcript_36319
F01_transcript_125137	F01_transcript_100630;F01_transcript_100843;F01_transcript_101134;F01_transcript_103307;F01_transcript_104492;F01_transcript_104911;F01_transcript_108062;F01_transcript_108139;F01_transcript_112942;F01_transcript_113672;F01_transcript_114067;F01_transcript_115843;F01_transcript_116560;F01_transcript_118129;F01_transcript_119836;F01_transcript_12277;F01_transcript_126087;F01_transcript_126218;F01_…
F01_transcript_58637	F01_transcript_105707;F01_transcript_112957;F01_transcript_147521;F01_transcript_2278;F01_transcript_38555;F01_transcript_40319
F01_transcript_117059	F01_transcript_100432;F01_transcript_105795;F01_transcript_106159;F01_transcript_107186;F01_transcript_115005;F01_transcript_117257;F01_transcript_120632;F01_transcript_124197;F01_transcript_124362;F01_transcript_125353;F01_transcript_126302;F01_transcript_129082;F01_transcript_133072;F01_transcript_135640;F01_transcript_13582;F01_transcript_142819;F01_transcript_145478;F01_transcript_145894;F01_…
F01_transcript_142817	F01_transcript_131488;F01_transcript_146743;F01_transcript_20113;F01_transcript_99527
F01_transcript_101214	F01_transcript_75513
F01_transcript_109342	F01_transcript_42077;F01_transcript_47056;F01_transcript_88520;F01_transcript_92437
F01_transcript_71116	F01_transcript_46241;F01_transcript_93936
F01_transcript_119786	F01_transcript_100128;F01_transcript_105790;F01_transcript_107559;F01_transcript_115178;F01_transcript_117742;F01_transcript_122441;F01_transcript_125355;F01_transcript_127722;F01_transcript_133418;F01_transcript_140830;F01_transcript_147365;F01_transcript_152098;F01_transcript_153989;F01_transcript_24229;F01_transcript_24887;F01_transcript_25622;F01_transcript_26355;F01_transcript_27295;F01_tran…
F01_transcript_64569	F01_transcript_115872
F01_transcript_95255	F01_transcript_130511;F01_transcript_1625
F01_transcript_146268	F01_transcript_109632;F01_transcript_148761;F01_transcript_29330;F01_transcript_95371
F01_transcript_135995	F01_transcript_10299;F01_transcript_106286;F01_transcript_118999;F01_transcript_121954;F01_transcript_12853;F01_transcript_129856;F01_transcript_13017;F01_transcript_137893;F01_transcript_141386;F01_transcript_146314;F01_transcript_146621;F01_transcript_150048;F01_transcript_150075;F01_transcript_150311;F01_transcript_15040;F01_transcript_15504;F01_transcript_1586;F01_transcript_24394;F01_transcr…
F01_transcript_147647	F01_transcript_100397;F01_transcript_100414;F01_transcript_100429;F01_transcript_101081;F01_transcript_101416;F01_transcript_101430;F01_transcript_101592;F01_transcript_101900;F01_transcript_101911;F01_transcript_101992;F01_transcript_102300;F01_transcript_102527;F01_transcript_102555;F01_transcript_103329;F01_transcript_103963;F01_transcript_104773;F01_transcript_104819;F01_transcript_105612;F01…
F01_transcript_110863	F01_transcript_104833;F01_transcript_156088;F01_transcript_23639;F01_transcript_34383;F01_transcript_34812;F01_transcript_35491;F01_transcript_39277
F01_transcript_88824	F01_transcript_101398;F01_transcript_102591;F01_transcript_102897;F01_transcript_105001;F01_transcript_105801;F01_transcript_106348;F01_transcript_106451;F01_transcript_107235;F01_transcript_108532;F01_transcript_109455;F01_transcript_109682;F01_transcript_110843;F01_transcript_113366;F01_transcript_113663;F01_transcript_120575;F01_transcript_120864;F01_transcript_121002;F01_transcript_121008;F01…
F01_transcript_52874	F01_transcript_135221;F01_transcript_135377;F01_transcript_137961;F01_transcript_142255;F01_transcript_142708;F01_transcript_143106;F01_transcript_151714;F01_transcript_46012;F01_transcript_49102;F01_transcript_60530;F01_transcript_84537;F01_transcript_86335;F01_transcript_90936
F01_transcript_96521	F01_transcript_33915;F01_transcript_69594
F01_transcript_53560	F01_transcript_139642;F01_transcript_153594;F01_transcript_79065
F01_transcript_149895	F01_transcript_107179;F01_transcript_139770;F01_transcript_141588;F01_transcript_33184;F01_transcript_59899;F01_transcript_62281;F01_transcript_96462
F01_transcript_99884	F01_transcript_139843
F01_transcript_109806	F01_transcript_54741;F01_transcript_59107;F01_transcript_85348
F01_transcript_148203	F01_transcript_103953;F01_transcript_104032;F01_transcript_104500;F01_transcript_104644;F01_transcript_107306;F01_transcript_107751;F01_transcript_108447;F01_transcript_108451;F01_transcript_112005;F01_transcript_118004;F01_transcript_123162;F01_transcript_123913;F01_transcript_124487;F01_transcript_124763;F01_transcript_125357;F01_transcript_127324;F01_transcript_127731;F01_transcript_131876;F01…
F01_transcript_131722	F01_transcript_100107;F01_transcript_100192;F01_transcript_100923;F01_transcript_101643;F01_transcript_1040;F01_transcript_104579;F01_transcript_105172;F01_transcript_105409;F01_transcript_105790;F01_transcript_105898;F01_transcript_105974;F01_transcript_106558;F01_transcript_107559;F01_transcript_108646;F01_transcript_111860;F01_transcript_112666;F01_transcript_112772;F01_transcript_114144;F01_t…
F01_transcript_126024	F01_transcript_100908;F01_transcript_101229;F01_transcript_101398;F01_transcript_102897;F01_transcript_105001;F01_transcript_105801;F01_transcript_106348;F01_transcript_106451;F01_transcript_107235;F01_transcript_109455;F01_transcript_109682;F01_transcript_110843;F01_transcript_113366;F01_transcript_113663;F01_transcript_120575;F01_transcript_120864;F01_transcript_121002;F01_transcript_121008;F01…
F01_transcript_122968	F01_transcript_140116;F01_transcript_60546;F01_transcript_86170
F01_transcript_84472	F01_transcript_104833;F01_transcript_110150;F01_transcript_112155;F01_transcript_119009;F01_transcript_143026;F01_transcript_148665;F01_transcript_27264;F01_transcript_35491;F01_transcript_38747;F01_transcript_38892;F01_transcript_42498;F01_transcript_49812;F01_transcript_50899;F01_transcript_51799;F01_transcript_52534;F01_transcript_53386;F01_transcript_56646;F01_transcript_57842;F01_transcript_…
F01_transcript_155420	F01_transcript_114802
F01_transcript_98580	F01_transcript_145439;F01_transcript_51993;F01_transcript_81430
F01_transcript_122527	F01_transcript_34653;F01_transcript_59737;F01_transcript_69100
F01_transcript_116182	F01_transcript_56427
F01_transcript_50727	F01_transcript_50689;F01_transcript_97956
F01_transcript_124130	F01_transcript_141519
F01_transcript_111644	F01_transcript_100414;F01_transcript_100429;F01_transcript_101081;F01_transcript_101416;F01_transcript_101430;F01_transcript_101592;F01_transcript_101900;F01_transcript_101992;F01_transcript_102300;F01_transcript_102346;F01_transcript_102527;F01_transcript_103329;F01_transcript_103963;F01_transcript_104773;F01_transcript_104819;F01_transcript_105612;F01_transcript_105694;F01_transcript_106261;F01…
F01_transcript_144249	F01_transcript_100085;F01_transcript_100762;F01_transcript_101056;F01_transcript_103302;F01_transcript_104533;F01_transcript_104893;F01_transcript_106776;F01_transcript_107242;F01_transcript_107635;F01_transcript_107862;F01_transcript_113231;F01_transcript_113546;F01_transcript_113555;F01_transcript_114440;F01_transcript_116236;F01_transcript_116991;F01_transcript_117011;F01_transcript_118880;F01…
F01_transcript_51598	F01_transcript_125200;F01_transcript_128308;F01_transcript_147964;F01_transcript_32611;F01_transcript_43617;F01_transcript_45309;F01_transcript_45814;F01_transcript_47119;F01_transcript_59205;F01_transcript_83265
F01_transcript_153784	F01_transcript_104912;F01_transcript_105989;F01_transcript_106109;F01_transcript_108968;F01_transcript_109059;F01_transcript_115993;F01_transcript_116468;F01_transcript_119484;F01_transcript_123266;F01_transcript_12609;F01_transcript_129148;F01_transcript_132254;F01_transcript_133552;F01_transcript_142497;F01_transcript_144453;F01_transcript_149302;F01_transcript_152816;F01_transcript_155536;F01_…
F01_transcript_105770	F01_transcript_100057;F01_transcript_102482;F01_transcript_10283;F01_transcript_106786;F01_transcript_108092;F01_transcript_108402;F01_transcript_108643;F01_transcript_108770;F01_transcript_111289;F01_transcript_111662;F01_transcript_112243;F01_transcript_112325;F01_transcript_113065;F01_transcript_117289;F01_transcript_117974;F01_transcript_118760;F01_transcript_120176;F01_transcript_120798;F01_…
F01_transcript_54562	F01_transcript_100354;F01_transcript_101974;F01_transcript_102310;F01_transcript_102401;F01_transcript_104161;F01_transcript_104568;F01_transcript_104627;F01_transcript_104997;F01_transcript_106204;F01_transcript_106930;F01_transcript_108068;F01_transcript_108318;F01_transcript_111346;F01_transcript_113026;F01_transcript_113198;F01_transcript_113318;F01_transcript_113364;F01_transcript_113730;F01…
F01_transcript_133030	F01_transcript_100080;F01_transcript_109175;F01_transcript_110153;F01_transcript_113002;F01_transcript_117215;F01_transcript_119131;F01_transcript_129586;F01_transcript_129612;F01_transcript_129615;F01_transcript_132044;F01_transcript_136008;F01_transcript_138585;F01_transcript_147290;F01_transcript_153218;F01_transcript_4453;F01_transcript_56960;F01_transcript_61094;F01_transcript_68959;F01_tran…
F01_transcript_115910	F01_transcript_91834
F01_transcript_84842	F01_transcript_103163;F01_transcript_118881;F01_transcript_134289;F01_transcript_154358;F01_transcript_31087;F01_transcript_32937;F01_transcript_41549;F01_transcript_54741;F01_transcript_59107;F01_transcript_72075;F01_transcript_81622;F01_transcript_85348;F01_transcript_90952
F01_transcript_84027	F01_transcript_109989;F01_transcript_30601;F01_transcript_62553;F01_transcript_84726;F01_transcript_93125;F01_transcript_98408
F01_transcript_82293	F01_transcript_103571;F01_transcript_104597;F01_transcript_105866;F01_transcript_108607;F01_transcript_111064;F01_transcript_115148;F01_transcript_129099;F01_transcript_129414;F01_transcript_130112;F01_transcript_138142;F01_transcript_147304;F01_transcript_148940;F01_transcript_150691;F01_transcript_155491;F01_transcript_155586;F01_transcript_156117;F01_transcript_21984;F01_transcript_36844;F01_t…
F01_transcript_154243	F01_transcript_126204
F01_transcript_92564	F01_transcript_102017;F01_transcript_107463;F01_transcript_115752;F01_transcript_118937;F01_transcript_124376;F01_transcript_127355;F01_transcript_130534;F01_transcript_137558;F01_transcript_18940;F01_transcript_24650;F01_transcript_33932;F01_transcript_45109;F01_transcript_75178;F01_transcript_78565;F01_transcript_90456;F01_transcript_92893;F01_transcript_99909
F01_transcript_153796	F01_transcript_100129;F01_transcript_101613;F01_transcript_103611;F01_transcript_114789;F01_transcript_115985;F01_transcript_116156;F01_transcript_12245;F01_transcript_124918;F01_transcript_128941;F01_transcript_133800;F01_transcript_136092;F01_transcript_136713;F01_transcript_13837;F01_transcript_139851;F01_transcript_140326;F01_transcript_140870;F01_transcript_148436;F01_transcript_150256;F01_t…
