# Supplementary material for: SMRT and Illumina RNA-Seq Identifies Potential Candidate Genes Related to the Double Flower Phenotype and Unveils SsAP2 as a Key Regulator of the Double-Flower Trait in Sagittaria sagittifolia
Source: Int J Mol Sci. 2022 Feb 17;23(4):2240. doi: 10.3390/ijms23042240 (PMC8875719; doi:10.3390/ijms23042240)
Supplement: Supplementary file 1 [file ijms-23-02240-s001.zip › Supplementary Table 5 The annotation of differential expression transcript statistics.xls]

#DEG_Set	Annotated	COG	GO	KEGG	KOG	Pfam	Swiss-Prot	Swissprot	eggNOG	nr
SC3-1_SC3-2_SC3-3_vs_ SC1-1	15,074	6,450	10,855	6,903	9,563	12,671	11,591	11,591	14,747	14,980
SC3-1_SC3-2_SC3-3_vs_ SC1-2	15,631	6,726	11,238	7,171	9,960	13,217	11,946	11,946	15,310	15,534
SC3-1_SC3-2_SC3-3_vs_ SX1-1	2,780	1,343	2,077	1,265	1,615	2,413	2,250	2,250	2,697	2,762
SC3-1_SC3-2_SC3-3_vs_ SX1-2	3,204	1,495	2,309	1,237	1,758	2,788	2,533	2,533	3,098	3,182
SX3-1-SX3-2-SX3-3_vs_SC1-1	12,229	5,179	8,865	5,691	7,822	10,257	9,364	9,364	11,984	12,150
SX3-1-SX3-2-SX3-3-vs_SC1-2	13,395	5,719	9,691	6,222	8,539	11,285	10,213	10,213	13,128	13,305
SX3-1-SX3-2-SX3-3_vs_SX1-1	2,768	1,300	2,079	1,167	1,503	2,395	2,244	2,244	2,681	2,745
SX3-1-SX3-2-SX3-3_vs_SX1-2	747	354	552	344	475	651	614	614	731	740
DC3-1_DC3-2_DC3-3_vs_SC2-1-SC2-2-SC2-3	4,242	1,922	3,076	1,712	2,258	3,653	3,544	3,544	4,132	4,210
DC2-1_DC2-2_DC2-3_vs_ DC3-1_DC3-2_DC3-3	11,445	5,076	8,250	5,080	6,947	9,807	8,904	8,904	11,218	11,383
DC3-1_DC3-2_DC3-3_vs_ DC1-1_DC1-2_DC1-3	15,339	6,665	10,941	6,725	9,326	13,035	11,686	11,686	15,005	15,252
DC3-1_DC3-2_DC3-3_vs_ SC2-1_SC2-2_SC2-3	11,639	4,902	8,246	4,973	7,026	9,611	9,026	9,026	11,336	11,555
DC3-1_DC3-2_DC3-3_vs_SC1-1	14,716	6,310	10,556	6,579	9,176	12,364	11,328	11,328	14,390	14,625
DC3-1_DC3-2_DC3-3_vs_SC1-2	15,259	6,555	10,954	6,850	9,572	12,858	11,684	11,684	14,952	15,170
DC3-1_DC3-2_DC3-3_vs_SX1-1	4,423	2,105	3,221	1,795	2,384	3,814	3,604	3,604	4,296	4,391
DC3-1_DC3-2_DC3-3_vs_SX1-2	4,636	2,171	3,367	1,770	2,503	4,013	3,755	3,755	4,496	4,600
DC3-1_DC3-2_DC3-3_vs_SC3-1_SC3-2_SC3-3	13,210	5,865	9,526	5,936	8,176	11,333	10,206	10,206	12,951	13,137
DC3-1_DC3-2_DC3-3_vs_DC1-1_DC1-2_DC1-3	326	156	237	156	207	295	273	273	320	325
DC1-1_DC1-2_DC1-3_vs_ SC2-1_SC2-2_SC2-3	12,188	5,089	8,824	5,562	7,563	9,978	9,305	9,305	11,908	12,113
DC2-1_DC2-2_DC2-3_vs_SC1-1	6,956	2,995	5,151	3,205	4,321	5,832	5,379	5,379	6,783	6,902
DC2-1_DC2-2_DC2-3_vs_SC1-2	6,081	2,582	4,451	2,811	3,793	5,058	4,703	4,703	5,937	6,042
DC3-1_DC3-2_DC3-3_vs_SX1-1	4,770	2,311	3,616	2,305	2,935	4,221	3,877	3,877	4,696	4,749
DC2-1_DC2-2_DC2-3_vs_SX1-2	6,371	3,028	4,800	2,993	3,907	5,621	5,082	5,082	6,251	6,331
DC1-1_DC1-2_DC1-3_vs_ SC3-1_SC3-2_SC3-3	16,693	7,220	11,867	7,397	10,287	14,162	12,688	12,688	16,345	16,608
DC1-1_DC1-2_DC1-3_vs_ SC2-1_SC2-2_SC2-3	14,866	6,222	10,726	6,709	9,221	12,295	11,243	11,243	14,526	14,781
DC1-1_DC1-2_DC1-3_vs_SC1-1	9,425	3,998	6,879	4,281	5,676	7,972	7,220	7,220	9,195	9,358
DC1-1_DC1-2_DC1-3_vs_SC1-2	8,116	3,397	5,899	3,693	4,899	6,812	6,220	6,220	7,915	8,058
DC1-1_DC1-2_DC1-3_vs_SX1-1	8,946	4,078	6,582	4,239	5,583	7,756	7,074	7,074	8,783	8,903
DC1-1_DC1-2_DC1-3_vs_SX1-2	10,333	4,671	7,614	4,795	6,372	8,980	8,060	8,060	10,135	10,273
SC2-1_SC2-2_SC2-3_vs_SC1-1	6,728	2,957	4,956	3,148	4,215	5,864	5,233	5,233	6,590	6,690
SC2-1_SC2-2_SC2-3_vs_SC1-2	6,719	2,937	4,927	3,133	4,181	5,846	5,259	5,259	6,584	6,688
SC2-1_SC2-2_SC2-3_vs_SX1-1	7,190	3,096	5,181	3,224	4,518	5,852	5,637	5,637	6,997	7,140
SC2-1_SC2-2_SC2-3_vs_SX1-2	8,593	3,651	6,212	3,751	5,289	7,091	6,679	6,679	8,374	8,525
SX2-1_SX2-2_SX2-3_vs_SC1-1	5,693	2,667	4,299	2,917	3,817	5,002	4,447	4,447	5,601	5,657
SX2-1_SX2-2_SX2-3_vs_SC1-2	6,622	3,058	4,974	3,260	4,299	5,797	5,177	5,177	6,511	6,586
SX2-1_SX2-2_SX2-3_vs_SX1-1	8,395	3,627	6,056	3,668	5,133	6,866	6,552	6,552	8,165	8,332
SX2-1_SX2-2_SX2-3_vs_SX1-2	6,889	2,921	4,981	3,152	4,377	5,647	5,369	5,369	6,731	6,835
DX3-1_DX3-2_DX3-3_vs_SX3-1_SX3-2_SX3-3	3,123	1,580	2,276	1,283	1,648	2,718	2,573	2,573	3,045	3,101
DX3-1_DX3-2_DX3-3_vs_ SX2-1_SX2-2_SX2-3	7,830	3,351	5,688	3,467	4,673	6,456	6,128	6,128	7,620	7,764
DX3-1_DX3-2_DX3-3_vs_SC1-1	2,959	1,252	2,125	1,309	1,767	2,483	2,332	2,332	2,869	2,927
DX3-1_DX3-2_DX3-3_vs_SC1-2	3,022	1,263	2,160	1,334	1,807	2,542	2,391	2,391	2,936	2,993
DX3-1_DX3-2_DX3-3_vs_SX1-1	606	322	463	278	334	550	530	530	592	599
DX3-1_DX3-2_DX3-3_vs_SX1-2	928	468	695	357	514	813	765	765	897	917
DX3-1_DX3-2_DX3-3_vs_ DX2-1_DX2-2_DX2-3	368	171	271	174	203	322	310	310	358	363
DX3-1_DX3-2_DX3-3_vs_DX1-1_DX1-2_DX1-3	5,754	2,423	4,121	2,525	3,226	4,966	4,501	4,501	5,617	5,709
X02-1_X02-2_X02-3_vs_SX3-1_SX3-2_SX3-3	6,069	2,611	4,367	2,574	3,435	5,113	4,853	4,853	5,898	6,017
DX2-1_DX2-2_DX2-3vs_DX03-1_DX03-2_DX03-3	11,920	4,904	8,507	5,207	7,299	9,667	9,194	9,194	11,601	11,826
DX2-1_DX2-2_DX2-3_vs_SC1-1	11,563	4,889	8,350	5,264	7,269	9,591	8,870	8,870	11,282	11,478
X02-1_X02-2_X02-3_vs_SC1-2	11,624	4,923	8,347	5,283	7,269	9,647	8,921	8,921	11,370	11,550
DX2-1_DX2-2_DX2-3_vs_SX4-1	3,744	1,748	2,716	1,565	2,004	3,226	3,040	3,040	3,647	3,712
DX2-1_DX2-2_DX2-3_vs_SX1-2	4,706	2,098	3,470	1,977	2,599	4,060	3,755	3,755	4,575	4,672
D2-1_DX2-2_DX2-3_vs_ DX1-1_DX1-2_DX1-3	8,128	3,538	5,827	3,589	4,827	6,919	6,389	6,389	7,948	8,073
DX1-1_DX1-2_DX1-3_vs_ SX3-1_SX3-2_SX3-3	12,713	5,482	9,135	5,681	7,712	10,818	9,764	9,764	12,438	12,640
DX1-1_DX1-2_DX1-3_vs_SX2-1_SX2-2_SX2-3	15,219	6,424	10,966	6,782	9,387	12,582	11,581	11,581	14,857	15,124
DX1-1_DX1-2_DX1-3_vs_SC1-1	8,276	3,482	6,020	3,776	5,090	6,988	6,375	6,375	8,083	8,224
D1-1_DX1-2_DX1-3_vs_SC1-2	7,042	2,941	5,086	3,238	4,393	5,889	5,441	5,441	6,877	6,995
DX1-1_DX1-2_DX1-3_vs_SX1-1	7,308	3,346	5,401	3,419	4,484	6,379	5,820	5,820	7,182	7,271
DX1-1_DX1-2_DX1-3_vs_SX1-2	8,675	3,995	6,418	4,067	5,363	7,566	6,800	6,800	8,519	8,627
