# Supplementary material for: SMRT and Illumina RNA-Seq Identifies Potential Candidate Genes Related to the Double Flower Phenotype and Unveils SsAP2 as a Key Regulator of the Double-Flower Trait in Sagittaria sagittifolia
Source: Int J Mol Sci. 2022 Feb 17;23(4):2240. doi: 10.3390/ijms23042240 (PMC8875719; doi:10.3390/ijms23042240)
Supplement: Supplementary file 1 [file ijms-23-02240-s001.zip › Supplementary Table 6-MADS andAP2 andTF and up and down DEG.xlsx]

## Sheet: MADS
#ID	GO_annotation	KEGG_annotation	KOG_class_annotation	Pfam_annotation	Swissprot_annotation	eggNOG_class_annotation	nr_annotation
F01_transcript_100885	Molecular Function: DNA binding (GO:0003677);; Molecular Function: transcription factor activity, sequence-specific DNA binding (GO:0003700);; Cellular Component: nucleus (GO:0005634);; Biological Process: regulation of transcription, DNA-templated (GO:0006355);; Molecular Function: protein dimerization activity (GO:0046983);;	K09264|1.88587e-52|pda:103701267|K09264 MADS-box transcription factor, plant | (RefSeq) MADS-box transcription factor 16	Transcription	SRF-type transcription factor (DNA-binding and dimerisation domain);; K-box region	MADS-box transcription factor 16 OS=Oryza sativa subsp. japonica (Rice) PE=1 SV=2	Transcription	MADS box transcription factor AP3 [Sagittaria montevidensis]
F01_transcript_101566	Molecular Function: DNA binding (GO:0003677);; Molecular Function: transcription factor activity, sequence-specific DNA binding (GO:0003700);; Cellular Component: nucleus (GO:0005634);; Biological Process: regulation of transcription, DNA-templated (GO:0006355);; Molecular Function: protein dimerization activity (GO:0046983);; Biological Process: indeterminate inflorescence morphogenesis (GO:0048…	K09264|4.64002e-49|pda:103701620|K09264 MADS-box transcription factor, plant | (RefSeq) MADS-box transcription factor 3-like	Transcription	SRF-type transcription factor (DNA-binding and dimerisation domain);; K-box region	MADS-box transcription factor 21 OS=Oryza sativa subsp. japonica (Rice) PE=2 SV=1	Transcription	MADS-box transcription factor [Asparagus virgatus]
F01_transcript_104998	Molecular Function: DNA binding (GO:0003677);; Molecular Function: transcription factor activity, sequence-specific DNA binding (GO:0003700);; Cellular Component: nucleus (GO:0005634);; Biological Process: regulation of transcription, DNA-templated (GO:0006355);; Molecular Function: protein dimerization activity (GO:0046983);;	--	Transcription	K-box region;; SRF-type transcription factor (DNA-binding and dimerisation domain)	MADS-box protein SOC1 GN=F17K2.19 OS=Arabidopsis thaliana (Mouse-ear cress) PE=1 SV=1	Transcription	PREDICTED: MADS-box protein SOC1-like isoform X3 [Elaeis guineensis]
F01_transcript_105602	Molecular Function: DNA binding (GO:0003677);; Molecular Function: transcription factor activity, sequence-specific DNA binding (GO:0003700);; Cellular Component: nucleus (GO:0005634);; Biological Process: regulation of transcription, DNA-templated (GO:0006355);; Molecular Function: protein dimerization activity (GO:0046983);;	--	Transcription	K-box region	Agamous-like MADS-box protein AGL9 homolog OS=Aranda deborah (Orchid) PE=2 SV=1	Transcription	sepallata-like MADS box transcription factor 3, partial [Zingiber officinale]
F01_transcript_106489	Molecular Function: binding (GO:0005488);; Biological Process: transcription, DNA-templated (GO:0006351);;	--	Transcription	SRF-type transcription factor (DNA-binding and dimerisation domain);; K-box region	MADS-box transcription factor 50 OS=Oryza sativa subsp. japonica (Rice) PE=2 SV=1	Transcription	PREDICTED: MADS-box transcription factor 50-like [Phoenix dactylifera]
F01_transcript_107353	Molecular Function: DNA binding (GO:0003677);; Molecular Function: transcription factor activity, sequence-specific DNA binding (GO:0003700);; Cellular Component: nucleus (GO:0005634);; Biological Process: regulation of transcription, DNA-templated (GO:0006355);; Molecular Function: protein dimerization activity (GO:0046983);;	K09264|6.35302e-81|pda:103712799|K09264 MADS-box transcription factor, plant | (RefSeq) MADS-box transcription factor 6	Transcription	--	MADS-box transcription factor 6 OS=Oryza sativa subsp. japonica (Rice) PE=1 SV=1	Transcription	MADS-box transcription factor [Ananas comosus]
F01_transcript_108017	Molecular Function: DNA binding (GO:0003677);; Molecular Function: transcription factor activity, sequence-specific DNA binding (GO:0003700);; Cellular Component: nucleus (GO:0005634);; Biological Process: regulation of transcription, DNA-templated (GO:0006355);; Molecular Function: protein dimerization activity (GO:0046983);;	K09264|1.38004e-55|pda:103701267|K09264 MADS-box transcription factor, plant | (RefSeq) MADS-box transcription factor 16	Transcription	SRF-type transcription factor (DNA-binding and dimerisation domain);; K-box region	MADS-box transcription factor 16 OS=Oryza sativa subsp. japonica (Rice) PE=1 SV=2	Transcription	MADS box transcription factor AP3 [Sagittaria montevidensis]
F01_transcript_109557	--	K09264|6.26406e-45|mus:103982900|K09264 MADS-box transcription factor, plant | (RefSeq) truncated transcription factor CAULIFLOWER A-like	Transcription	K-box region;; SRF-type transcription factor (DNA-binding and dimerisation domain)	Agamous-like MADS-box protein AGL8 homolog OS=Solanum tuberosum (Potato) PE=2 SV=1	Transcription	PREDICTED: truncated transcription factor CAULIFLOWER A [Nelumbo nucifera]
F01_transcript_109824	Molecular Function: DNA binding (GO:0003677);; Molecular Function: transcription factor activity, sequence-specific DNA binding (GO:0003700);; Cellular Component: nucleus (GO:0005634);; Biological Process: regulation of transcription, DNA-templated (GO:0006355);; Biological Process: vegetative to reproductive phase transition of meristem (GO:0010228);; Molecular Function: protein dimerization act…	--	Transcription	--	MADS-box transcription factor 26 GN=P0498H04.24 OS=Oryza sativa subsp. japonica (Rice) PE=2 SV=1	Transcription	MADS-box transcription factor 26 [Triticum urartu]
F01_transcript_111970	Molecular Function: DNA binding (GO:0003677);; Molecular Function: transcription factor activity, sequence-specific DNA binding (GO:0003700);; Cellular Component: nucleus (GO:0005634);; Biological Process: regulation of transcription, DNA-templated (GO:0006355);; Molecular Function: protein dimerization activity (GO:0046983);;	K09264|1.87387e-103|pda:103712799|K09264 MADS-box transcription factor, plant | (RefSeq) MADS-box transcription factor 6	Transcription	--	MADS-box transcription factor 6 OS=Oryza sativa subsp. japonica (Rice) PE=1 SV=1	Transcription	MADS-box transcription factor AGL6a [Crocus sativus]
F01_transcript_112048	Molecular Function: DNA binding (GO:0003677);; Molecular Function: transcription factor activity, sequence-specific DNA binding (GO:0003700);; Cellular Component: nucleus (GO:0005634);; Biological Process: regulation of transcription, DNA-templated (GO:0006355);; Molecular Function: protein dimerization activity (GO:0046983);;	K09264|1.0007e-61|mus:103983639|K09264 MADS-box transcription factor, plant | (RefSeq) MADS1; MADS-box transcription factor 2	Transcription	SRF-type transcription factor (DNA-binding and dimerisation domain);; K-box region	MADS-box transcription factor 4 GN=OJ1212_B02.5 OS=Oryza sativa subsp. japonica (Rice) PE=1 SV=3	Transcription	MADS box containing protein PI [Sagittaria montevidensis]
F01_transcript_112286	Molecular Function: DNA binding (GO:0003677);; Molecular Function: transcription factor activity, sequence-specific DNA binding (GO:0003700);; Cellular Component: nucleus (GO:0005634);; Biological Process: regulation of transcription, DNA-templated (GO:0006355);; Biological Process: maintenance of inflorescence meristem identity (GO:0010077);; Biological Process: fruit development (GO:0010154);; …	--	Transcription	SRF-type transcription factor (DNA-binding and dimerisation domain)	Agamous-like MADS-box protein AGL8 homolog GN=AGL8 OS=Sinapis alba (White mustard) PE=2 SV=1	Transcription	hypothetical protein POPTR_0004s11430g [Populus trichocarpa]
F01_transcript_114233	Molecular Function: DNA binding (GO:0003677);; Molecular Function: transcription factor activity, sequence-specific DNA binding (GO:0003700);; Cellular Component: nucleus (GO:0005634);; Biological Process: regulation of transcription, DNA-templated (GO:0006355);; Molecular Function: protein dimerization activity (GO:0046983);;	--	Transcription	SRF-type transcription factor (DNA-binding and dimerisation domain)	MADS-box transcription factor 15 OS=Oryza sativa subsp. japonica (Rice) PE=1 SV=2	Transcription	putative MADS-box transcription factor family protein [Zea mays]
F01_transcript_114559	Molecular Function: binding (GO:0005488);; Biological Process: transcription, DNA-templated (GO:0006351);; Biological Process: regulation of gene expression (GO:0010468);; Biological Process: negative regulation of biological process (GO:0048519);; Biological Process: regulation of nitrogen compound metabolic process (GO:0051171);; Biological Process: regulation of primary metabolic process (GO:0…	--	Transcription	SRF-type transcription factor (DNA-binding and dimerisation domain);; K-box region	MADS-box protein JOINTLESS GN=J OS=Solanum lycopersicum (Tomato) PE=1 SV=1	Transcription	PREDICTED: MADS-box protein SVP-like [Elaeis guineensis]
F01_transcript_115173	Molecular Function: DNA binding (GO:0003677);; Molecular Function: transcription factor activity, sequence-specific DNA binding (GO:0003700);; Cellular Component: nucleus (GO:0005634);; Biological Process: regulation of transcription, DNA-templated (GO:0006355);; Molecular Function: protein dimerization activity (GO:0046983);;	--	Transcription	SRF-type transcription factor (DNA-binding and dimerisation domain)	MADS-box transcription factor 15 OS=Oryza sativa subsp. japonica (Rice) PE=1 SV=2	Transcription	PREDICTED: agamous-like MADS-box protein AGL8-like [Cucumis sativus]
F01_transcript_116688	Molecular Function: DNA binding (GO:0003677);; Molecular Function: transcription factor activity, sequence-specific DNA binding (GO:0003700);; Cellular Component: nucleus (GO:0005634);; Biological Process: regulation of transcription, DNA-templated (GO:0006355);; Molecular Function: protein dimerization activity (GO:0046983);;	K09264|5.09362e-94|pda:103702602|K09264 MADS-box transcription factor, plant | (RefSeq) MADS-box transcription factor 2-like	Transcription	SRF-type transcription factor (DNA-binding and dimerisation domain);; K-box region	MADS-box transcription factor 2 OS=Oryza sativa subsp. japonica (Rice) PE=2 SV=1	Transcription	MADS box containing protein PI [Sagittaria montevidensis]
F01_transcript_116825	Molecular Function: DNA binding (GO:0003677);; Molecular Function: transcription factor activity, sequence-specific DNA binding (GO:0003700);; Cellular Component: nucleus (GO:0005634);; Biological Process: regulation of transcription, DNA-templated (GO:0006355);; Biological Process: single-multicellular organism process (GO:0044707);; Biological Process: single-organism developmental process (GO:…	K09264|2.32742e-31|pda:103710313|K09264 MADS-box transcription factor, plant | (RefSeq) MADS-box transcription factor 14-like	Transcription	K-box region	Agamous-like MADS-box protein AGL8 GN=AGL8 OS=Arabidopsis thaliana (Mouse-ear cress) PE=1 SV=1	Transcription	MADS-box protein [Chloranthus spicatus]
F01_transcript_119041	Molecular Function: DNA binding (GO:0003677);; Molecular Function: transcription factor activity, sequence-specific DNA binding (GO:0003700);; Cellular Component: nucleus (GO:0005634);; Biological Process: regulation of transcription, DNA-templated (GO:0006355);; Biological Process: single-multicellular organism process (GO:0044707);; Biological Process: single-organism developmental process (GO:…	K09264|8.20734e-67|tcc:TCM_014345|K09264 MADS-box transcription factor, plant | (RefSeq) AGAMOUS-like 8 isoform 1	Transcription	SRF-type transcription factor (DNA-binding and dimerisation domain);; K-box region	MADS-box transcription factor 18 GN=OSJNBb0040H10.26 OS=Oryza sativa subsp. japonica (Rice) PE=1 SV=1	Transcription	MADS box protein [Lilium longiflorum]
F01_transcript_122347	Molecular Function: translation repressor activity, nucleic acid binding (GO:0000900);; Molecular Function: DNA binding (GO:0003677);; Molecular Function: transcription factor activity, sequence-specific DNA binding (GO:0003700);; Cellular Component: nucleus (GO:0005634);; Biological Process: response to temperature stimulus (GO:0009266);; Biological Process: negative regulation of flower develop…	--	Transcription	SRF-type transcription factor (DNA-binding and dimerisation domain);; K-box region	MADS-box protein SVP GN=SVP OS=Arabidopsis thaliana (Mouse-ear cress) PE=1 SV=1	Transcription	PREDICTED: MADS-box protein JOINTLESS-like [Elaeis guineensis]
F01_transcript_124542	Molecular Function: DNA binding (GO:0003677);; Molecular Function: transcription factor activity, sequence-specific DNA binding (GO:0003700);; Cellular Component: nucleus (GO:0005634);; Biological Process: regulation of transcription, DNA-templated (GO:0006355);; Molecular Function: protein dimerization activity (GO:0046983);;	--	Transcription	K-box region;; SRF-type transcription factor (DNA-binding and dimerisation domain)	Agamous-like MADS-box protein AGL9 homolog OS=Aranda deborah (Orchid) PE=2 SV=1	Transcription	sepallata-like MADS box transcription factor 3, partial [Canna jaegeriana]
F01_transcript_125267	Molecular Function: protein binding (GO:0005515);; Biological Process: transcription, DNA-templated (GO:0006351);; Cellular Component: membrane (GO:0016020);; Biological Process: reproductive structure development (GO:0048608);;	K09264|4.78481e-49|tcc:TCM_014345|K09264 MADS-box transcription factor, plant | (RefSeq) AGAMOUS-like 8 isoform 1	Transcription	K-box region;; SRF-type transcription factor (DNA-binding and dimerisation domain)	MADS-box transcription factor 18 GN=OSJNBb0040H10.26 OS=Oryza sativa subsp. japonica (Rice) PE=1 SV=1	Transcription	MADS-box protein 1 [Dendrobium nobile]
F01_transcript_126049	Molecular Function: DNA binding (GO:0003677);; Molecular Function: transcription factor activity, sequence-specific DNA binding (GO:0003700);; Cellular Component: nucleus (GO:0005634);; Biological Process: regulation of transcription, DNA-templated (GO:0006355);; Biological Process: multicellular organism development (GO:0007275);; Molecular Function: protein dimerization activity (GO:0046983);;	K09264|3.41189e-59|obr:102722626|K09264 MADS-box transcription factor, plant | (RefSeq) PI2; MADS-box transcription factor 2	Transcription	K-box region;; SRF-type transcription factor (DNA-binding and dimerisation domain)	MADS-box transcription factor 2 OS=Oryza sativa subsp. japonica (Rice) PE=2 SV=1	Transcription	MADS box containing protein PI [Sagittaria montevidensis]
F01_transcript_128032	--	K09264|1.39513e-60|mus:103975613|K09264 MADS-box transcription factor, plant | (RefSeq) truncated transcription factor CAULIFLOWER A-like	Transcription	SRF-type transcription factor (DNA-binding and dimerisation domain);; K-box region	MADS-box transcription factor 18 GN=OSJNBb0040H10.26 OS=Oryza sativa subsp. japonica (Rice) PE=1 SV=1	Transcription	MADS box protein [Lilium longiflorum]
F01_transcript_128189	Molecular Function: binding (GO:0005488);; Biological Process: transcription, DNA-templated (GO:0006351);; Biological Process: single-multicellular organism process (GO:0044707);; Biological Process: single-organism developmental process (GO:0044767);; Biological Process: anatomical structure development (GO:0048856);;	K09264|1.72324e-66|mus:103991012|K09264 MADS-box transcription factor, plant | (RefSeq) truncated transcription factor CAULIFLOWER A	Transcription	SRF-type transcription factor (DNA-binding and dimerisation domain);; K-box region	MADS-box transcription factor 18 GN=OSJNBb0040H10.26 OS=Oryza sativa subsp. japonica (Rice) PE=1 SV=1	Transcription	PREDICTED: truncated transcription factor CAULIFLOWER A-like [Musa acuminata subsp. malaccensis]
F01_transcript_128201	Molecular Function: DNA binding (GO:0003677);; Molecular Function: transcription factor activity, sequence-specific DNA binding (GO:0003700);; Cellular Component: nucleus (GO:0005634);; Biological Process: regulation of transcription, DNA-templated (GO:0006355);; Molecular Function: protein dimerization activity (GO:0046983);;	K09264|4.21996e-87|pda:103712799|K09264 MADS-box transcription factor, plant | (RefSeq) MADS-box transcription factor 6	Transcription	--	MADS-box transcription factor 6 OS=Oryza sativa subsp. japonica (Rice) PE=1 SV=1	Transcription	MADS-box transcription factor [Ananas comosus]
F01_transcript_128384	Molecular Function: DNA binding (GO:0003677);; Molecular Function: transcription factor activity, sequence-specific DNA binding (GO:0003700);; Cellular Component: nucleus (GO:0005634);; Biological Process: regulation of transcription, DNA-templated (GO:0006355);; Molecular Function: protein dimerization activity (GO:0046983);;	K09264|4.19457e-40|sita:101781084|K09264 MADS-box transcription factor, plant | (RefSeq) MADS-box transcription factor 16	Transcription	K-box region	MADS-box transcription factor 16 OS=Oryza sativa subsp. japonica (Rice) PE=1 SV=2	Transcription	MADS box transcription factor AP3 [Sagittaria montevidensis]
F01_transcript_129710	Molecular Function: binding (GO:0005488);; Biological Process: transcription, DNA-templated (GO:0006351);;	--	Transcription	K-box region;; SRF-type transcription factor (DNA-binding and dimerisation domain)	MADS-box transcription factor 8 OS=Oryza sativa subsp. japonica (Rice) PE=1 SV=1	Transcription	AGL9-like protein [Eupomatia bennettii]
F01_transcript_129935	Molecular Function: DNA binding (GO:0003677);; Molecular Function: transcription factor activity, sequence-specific DNA binding (GO:0003700);; Cellular Component: nucleus (GO:0005634);; Biological Process: regulation of transcription, DNA-templated (GO:0006355);; Biological Process: maintenance of inflorescence meristem identity (GO:0010077);; Biological Process: fruit development (GO:0010154);; …	K09264|4.3101e-59|mus:103991012|K09264 MADS-box transcription factor, plant | (RefSeq) truncated transcription factor CAULIFLOWER A	Transcription	SRF-type transcription factor (DNA-binding and dimerisation domain);; K-box region	MADS-box transcription factor 18 GN=OSJNBb0040H10.26 OS=Oryza sativa subsp. japonica (Rice) PE=1 SV=1	Transcription	FUL-like protein 2 [Euptelea pleiosperma]
F01_transcript_130399	Molecular Function: DNA binding (GO:0003677);; Molecular Function: transcription factor activity, sequence-specific DNA binding (GO:0003700);; Cellular Component: nucleus (GO:0005634);; Biological Process: regulation of transcription, DNA-templated (GO:0006355);; Molecular Function: protein dimerization activity (GO:0046983);;	K09264|5.51423e-132|pda:103712799|K09264 MADS-box transcription factor, plant | (RefSeq) MADS-box transcription factor 6	Transcription	K-box region;; SRF-type transcription factor (DNA-binding and dimerisation domain)	MADS-box transcription factor 6 OS=Oryza sativa subsp. japonica (Rice) PE=1 SV=1	Transcription	MADS-box transcription factor [Ananas comosus]
F01_transcript_130615	Molecular Function: DNA binding (GO:0003677);; Molecular Function: transcription factor activity, sequence-specific DNA binding (GO:0003700);; Cellular Component: nucleus (GO:0005634);; Biological Process: regulation of transcription, DNA-templated (GO:0006355);; Molecular Function: protein dimerization activity (GO:0046983);;	K09264|1.66014e-54|pda:103701267|K09264 MADS-box transcription factor, plant | (RefSeq) MADS-box transcription factor 16	Transcription	SRF-type transcription factor (DNA-binding and dimerisation domain);; K-box region	MADS-box transcription factor 16 OS=Oryza sativa subsp. japonica (Rice) PE=1 SV=2	Transcription	MADS box transcription factor AP3 [Sagittaria montevidensis]
F01_transcript_131095	Molecular Function: DNA binding (GO:0003677);; Molecular Function: transcription factor activity, sequence-specific DNA binding (GO:0003700);; Cellular Component: nucleus (GO:0005634);; Biological Process: regulation of transcription, DNA-templated (GO:0006355);; Molecular Function: protein dimerization activity (GO:0046983);;	K09264|3.78678e-54|pda:103701267|K09264 MADS-box transcription factor, plant | (RefSeq) MADS-box transcription factor 16	Transcription	SRF-type transcription factor (DNA-binding and dimerisation domain);; K-box region	MADS-box transcription factor 16 OS=Oryza sativa subsp. japonica (Rice) PE=1 SV=2	Transcription	MADS box transcription factor AP3 [Sagittaria montevidensis]
F01_transcript_132224	Molecular Function: DNA binding (GO:0003677);; Molecular Function: transcription factor activity, sequence-specific DNA binding (GO:0003700);; Cellular Component: nucleus (GO:0005634);; Biological Process: regulation of transcription, DNA-templated (GO:0006355);; Molecular Function: protein dimerization activity (GO:0046983);;	K09264|1.92612e-54|mus:103983639|K09264 MADS-box transcription factor, plant | (RefSeq) MADS1; MADS-box transcription factor 2	Transcription	SRF-type transcription factor (DNA-binding and dimerisation domain);; K-box region	MADS-box transcription factor 2 OS=Oryza sativa subsp. japonica (Rice) PE=2 SV=1	Transcription	MADS box containing protein PI [Sagittaria montevidensis]
F01_transcript_132659	Molecular Function: DNA binding (GO:0003677);; Molecular Function: transcription factor activity, sequence-specific DNA binding (GO:0003700);; Cellular Component: nucleus (GO:0005634);; Biological Process: regulation of transcription, DNA-templated (GO:0006355);; Molecular Function: protein dimerization activity (GO:0046983);;	--	Transcription	K-box region;; SRF-type transcription factor (DNA-binding and dimerisation domain)	MADS-box protein SOC1 GN=F17K2.19 OS=Arabidopsis thaliana (Mouse-ear cress) PE=1 SV=1	Transcription	PREDICTED: MADS-box transcription factor 50-like [Phoenix dactylifera]
F01_transcript_134898	Molecular Function: binding (GO:0005488);; Biological Process: transcription, DNA-templated (GO:0006351);;	--	Transcription	SRF-type transcription factor (DNA-binding and dimerisation domain);; K-box region	MADS-box transcription factor 8 OS=Oryza sativa subsp. japonica (Rice) PE=1 SV=1	Transcription	AGL9 [Liriodendron tulipifera]
F01_transcript_135205	Molecular Function: DNA binding (GO:0003677);; Molecular Function: transcription factor activity, sequence-specific DNA binding (GO:0003700);; Cellular Component: nucleus (GO:0005634);; Biological Process: regulation of transcription, DNA-templated (GO:0006355);; Molecular Function: protein dimerization activity (GO:0046983);;	K09264|1.60733e-21|pop:POPTR_0002s07920g|K09264 MADS-box transcription factor, plant | (RefSeq) POPTRDRAFT_709904; MADS-box family protein	Transcription	SRF-type transcription factor (DNA-binding and dimerisation domain);; K-box region	Floral homeotic protein PMADS 2 GN=PMADS2 OS=Petunia hybrida (Petunia) PE=2 SV=1	Transcription	MADS box transcription factor AP3 [Sagittaria montevidensis]
F01_transcript_135363	Molecular Function: DNA binding (GO:0003677);; Molecular Function: transcription factor activity, sequence-specific DNA binding (GO:0003700);; Cellular Component: nucleus (GO:0005634);; Biological Process: regulation of transcription, DNA-templated (GO:0006355);; Molecular Function: protein dimerization activity (GO:0046983);;	--	Transcription	K-box region	Agamous-like MADS-box protein AGL9 homolog OS=Aranda deborah (Orchid) PE=2 SV=1	Transcription	sepallata-like MADS box transcription factor 3, partial [Zingiber officinale]
F01_transcript_135428	Molecular Function: DNA binding (GO:0003677);; Molecular Function: transcription factor activity, sequence-specific DNA binding (GO:0003700);; Cellular Component: nucleus (GO:0005634);; Biological Process: regulation of transcription, DNA-templated (GO:0006355);; Molecular Function: protein dimerization activity (GO:0046983);;	K09264|4.72157e-19|mus:103978647|K09264 MADS-box transcription factor, plant | (RefSeq) MADS-box transcription factor 6-like	Transcription	--	MADS-box transcription factor 6 OS=Oryza sativa subsp. japonica (Rice) PE=1 SV=1	Transcription	MADS-box transcription factor AGL6a [Crocus sativus]
F01_transcript_136760	--	K09264|5.78946e-48|mus:103993873|K09264 MADS-box transcription factor, plant | (RefSeq) truncated transcription factor CAULIFLOWER A-like	Transcription	K-box region;; SRF-type transcription factor (DNA-binding and dimerisation domain)	MADS-box transcription factor 14 OS=Oryza sativa subsp. japonica (Rice) PE=1 SV=2	Transcription	PREDICTED: truncated transcription factor CAULIFLOWER A-like isoform X3 [Populus euphratica]
F01_transcript_137658	Molecular Function: DNA binding (GO:0003677);; Molecular Function: transcription factor activity, sequence-specific DNA binding (GO:0003700);; Cellular Component: nucleus (GO:0005634);; Biological Process: regulation of transcription, DNA-templated (GO:0006355);; Molecular Function: protein dimerization activity (GO:0046983);;	K09264|3.49005e-54|pda:103701267|K09264 MADS-box transcription factor, plant | (RefSeq) MADS-box transcription factor 16	Transcription	SRF-type transcription factor (DNA-binding and dimerisation domain);; K-box region	MADS-box transcription factor 16 OS=Oryza sativa subsp. japonica (Rice) PE=1 SV=2	Transcription	MADS box transcription factor AP3 [Sagittaria montevidensis]
F01_transcript_140412	Molecular Function: DNA binding (GO:0003677);; Molecular Function: transcription factor activity, sequence-specific DNA binding (GO:0003700);; Cellular Component: nucleus (GO:0005634);; Biological Process: regulation of transcription, DNA-templated (GO:0006355);; Molecular Function: protein dimerization activity (GO:0046983);;	K09264|1.54182e-21|pop:POPTR_0002s07920g|K09264 MADS-box transcription factor, plant | (RefSeq) POPTRDRAFT_709904; MADS-box family protein	Transcription	SRF-type transcription factor (DNA-binding and dimerisation domain);; K-box region	Floral homeotic protein PMADS 2 GN=PMADS2 OS=Petunia hybrida (Petunia) PE=2 SV=1	Transcription	MADS box transcription factor AP3 [Sagittaria montevidensis]
F01_transcript_143082	Molecular Function: DNA binding (GO:0003677);; Molecular Function: transcription factor activity, sequence-specific DNA binding (GO:0003700);; Cellular Component: nucleus (GO:0005634);; Biological Process: regulation of transcription, DNA-templated (GO:0006355);; Biological Process: specification of floral organ identity (GO:0010093);; Molecular Function: protein dimerization activity (GO:0046983…	K09264|3.00863e-31|obr:102718281|K09264 MADS-box transcription factor, plant | (RefSeq) AP3; MADS-box transcription factor 16	Transcription	SRF-type transcription factor (DNA-binding and dimerisation domain)	MADS-box transcription factor 16 OS=Oryza sativa subsp. japonica (Rice) PE=1 SV=2	Transcription	MADS box transcription factor AP3 [Sagittaria montevidensis]
F01_transcript_145042	Molecular Function: binding (GO:0005488);; Biological Process: transcription, DNA-templated (GO:0006351);; Biological Process: single-multicellular organism process (GO:0044707);; Biological Process: single-organism developmental process (GO:0044767);; Biological Process: anatomical structure development (GO:0048856);;	K09264|3.29765e-65|tcc:TCM_014345|K09264 MADS-box transcription factor, plant | (RefSeq) AGAMOUS-like 8 isoform 1	Transcription	SRF-type transcription factor (DNA-binding and dimerisation domain);; K-box region	MADS-box transcription factor 18 GN=OSJNBb0040H10.26 OS=Oryza sativa subsp. japonica (Rice) PE=1 SV=1	Transcription	PREDICTED: truncated transcription factor CAULIFLOWER A isoform X2 [Cucumis melo]
F01_transcript_148272	Molecular Function: binding (GO:0005488);; Biological Process: transcription, DNA-templated (GO:0006351);; Biological Process: single-multicellular organism process (GO:0044707);; Biological Process: single-organism developmental process (GO:0044767);; Biological Process: anatomical structure development (GO:0048856);;	K09264|1.45446e-64|mus:103975613|K09264 MADS-box transcription factor, plant | (RefSeq) truncated transcription factor CAULIFLOWER A-like	Transcription	SRF-type transcription factor (DNA-binding and dimerisation domain);; K-box region	MADS-box transcription factor 18 GN=OSJNBb0040H10.26 OS=Oryza sativa subsp. japonica (Rice) PE=1 SV=1	Transcription	PREDICTED: truncated transcription factor CAULIFLOWER A isoform X2 [Cucumis melo]
F01_transcript_150451	Molecular Function: DNA binding (GO:0003677);; Molecular Function: transcription factor activity, sequence-specific DNA binding (GO:0003700);; Cellular Component: nucleus (GO:0005634);; Biological Process: regulation of transcription, DNA-templated (GO:0006355);; Molecular Function: protein dimerization activity (GO:0046983);;	K09264|3.49687e-133|pda:103712799|K09264 MADS-box transcription factor, plant | (RefSeq) MADS-box transcription factor 6	Transcription	K-box region;; SRF-type transcription factor (DNA-binding and dimerisation domain)	MADS-box transcription factor 6 OS=Oryza sativa subsp. japonica (Rice) PE=1 SV=1	Transcription	MADS-box transcription factor [Ananas comosus]
F01_transcript_153231	--	K09264|3.138e-68|mus:103991012|K09264 MADS-box transcription factor, plant | (RefSeq) truncated transcription factor CAULIFLOWER A	Transcription	SRF-type transcription factor (DNA-binding and dimerisation domain);; K-box region	MADS-box transcription factor 18 GN=OSJNBb0040H10.26 OS=Oryza sativa subsp. japonica (Rice) PE=1 SV=1	Transcription	MADS-box protein 1 [Dendrobium nobile]
F01_transcript_153581	Molecular Function: DNA binding (GO:0003677);; Molecular Function: transcription factor activity, sequence-specific DNA binding (GO:0003700);; Cellular Component: nucleus (GO:0005634);; Biological Process: regulation of transcription, DNA-templated (GO:0006355);; Biological Process: vegetative to reproductive phase transition of meristem (GO:0010228);; Molecular Function: protein dimerization act…	--	Transcription	--	MADS-box transcription factor 26 GN=P0498H04.24 OS=Oryza sativa subsp. japonica (Rice) PE=2 SV=1	Transcription	MADS-box transcription factor 26 [Triticum urartu]
F01_transcript_153621	Molecular Function: DNA binding (GO:0003677);; Molecular Function: transcription factor activity, sequence-specific DNA binding (GO:0003700);; Cellular Component: nucleus (GO:0005634);; Biological Process: regulation of transcription, DNA-templated (GO:0006355);; Molecular Function: protein dimerization activity (GO:0046983);;	--	Transcription	K-box region	Agamous-like MADS-box protein AGL9 homolog OS=Aranda deborah (Orchid) PE=2 SV=1	Transcription	transcription factor SEP3 [Chloranthus spicatus]
F01_transcript_155792	Molecular Function: DNA binding (GO:0003677);; Molecular Function: transcription factor activity, sequence-specific DNA binding (GO:0003700);; Cellular Component: nucleus (GO:0005634);; Biological Process: regulation of transcription, DNA-templated (GO:0006355);; Molecular Function: protein dimerization activity (GO:0046983);;	K09264|2.21235e-55|fve:101305755|K09264 MADS-box transcription factor, plant | (RefSeq) truncated transcription factor CAULIFLOWER A	Transcription	SRF-type transcription factor (DNA-binding and dimerisation domain);; K-box region	Agamous-like MADS-box protein AGL8 homolog GN=AGL8 OS=Sinapis alba (White mustard) PE=2 SV=1	Transcription	FRUITFULL-like protein, partial [Macleaya cordata]
F01_transcript_156192	Molecular Function: DNA binding (GO:0003677);; Molecular Function: transcription factor activity, sequence-specific DNA binding (GO:0003700);; Cellular Component: nucleus (GO:0005634);; Biological Process: regulation of transcription, DNA-templated (GO:0006355);; Molecular Function: protein dimerization activity (GO:0046983);;	K09264|4.90878e-45|pda:103712799|K09264 MADS-box transcription factor, plant | (RefSeq) MADS-box transcription factor 6	Transcription	SRF-type transcription factor (DNA-binding and dimerisation domain);; K-box region	MADS-box transcription factor 6 OS=Oryza sativa subsp. japonica (Rice) PE=1 SV=1	Transcription	MADS box protein [Asparagus officinalis]
F01_transcript_156288	Molecular Function: DNA binding (GO:0003677);; Molecular Function: transcription factor activity, sequence-specific DNA binding (GO:0003700);; Cellular Component: nucleus (GO:0005634);; Biological Process: regulation of transcription, DNA-templated (GO:0006355);; Molecular Function: protein dimerization activity (GO:0046983);;	K09264|9.21046e-65|mus:103998548|K09264 MADS-box transcription factor, plant | (RefSeq) MADS-box transcription factor 16-like	Transcription	SRF-type transcription factor (DNA-binding and dimerisation domain);; K-box region	MADS-box transcription factor 16 OS=Oryza sativa subsp. japonica (Rice) PE=1 SV=2	Transcription	MADS box transcription factor AP3 [Sagittaria montevidensis]
F01_transcript_36117	Molecular Function: binding (GO:0005488);; Biological Process: transcription, DNA-templated (GO:0006351);;	--	Transcription	SRF-type transcription factor (DNA-binding and dimerisation domain);; K-box region	MADS-box transcription factor 50 OS=Oryza sativa subsp. japonica (Rice) PE=2 SV=1	Transcription	PREDICTED: MADS-box transcription factor 50-like [Phoenix dactylifera]
F01_transcript_377	Molecular Function: DNA binding (GO:0003677);; Molecular Function: transcription factor activity, sequence-specific DNA binding (GO:0003700);; Cellular Component: nucleus (GO:0005634);; Biological Process: regulation of transcription, DNA-templated (GO:0006355);; Molecular Function: protein dimerization activity (GO:0046983);;	K09264|1.70061e-21|pop:POPTR_0002s07920g|K09264 MADS-box transcription factor, plant | (RefSeq) POPTRDRAFT_709904; MADS-box family protein	Transcription	SRF-type transcription factor (DNA-binding and dimerisation domain)	Floral homeotic protein PMADS 2 GN=PMADS2 OS=Petunia hybrida (Petunia) PE=2 SV=1	Transcription	MADS box transcription factor AP3 [Sagittaria montevidensis]
F01_transcript_38978	Molecular Function: binding (GO:0005488);; Biological Process: transcription, DNA-templated (GO:0006351);;	--	Transcription	SRF-type transcription factor (DNA-binding and dimerisation domain);; K-box region	MADS-box transcription factor 8 OS=Oryza sativa subsp. japonica (Rice) PE=1 SV=1	Transcription	AGL9 [Liriodendron tulipifera]
F01_transcript_39706	Molecular Function: DNA binding (GO:0003677);; Molecular Function: transcription factor activity, sequence-specific DNA binding (GO:0003700);; Cellular Component: nucleus (GO:0005634);; Biological Process: regulation of transcription, DNA-templated (GO:0006355);; Molecular Function: protein dimerization activity (GO:0046983);;	K09264|1.1858e-136|pda:103712799|K09264 MADS-box transcription factor, plant | (RefSeq) MADS-box transcription factor 6	Transcription	K-box region;; SRF-type transcription factor (DNA-binding and dimerisation domain)	MADS-box transcription factor 6 OS=Oryza sativa subsp. japonica (Rice) PE=1 SV=1	Transcription	MADS-box transcription factor [Ananas comosus]
F01_transcript_39799	Molecular Function: binding (GO:0005488);; Biological Process: transcription, DNA-templated (GO:0006351);;	--	Transcription	SRF-type transcription factor (DNA-binding and dimerisation domain);; K-box region	MADS-box protein SOC1 GN=F17K2.19 OS=Arabidopsis thaliana (Mouse-ear cress) PE=1 SV=1	Transcription	PREDICTED: MADS-box transcription factor 50-like [Phoenix dactylifera]
F01_transcript_40734	Molecular Function: binding (GO:0005488);; Biological Process: transcription, DNA-templated (GO:0006351);;	--	Transcription	SRF-type transcription factor (DNA-binding and dimerisation domain);; K-box region	MADS-box transcription factor 8 OS=Oryza sativa subsp. japonica (Rice) PE=1 SV=1	Transcription	AGL9 [Liriodendron tulipifera]
F01_transcript_41126	Molecular Function: binding (GO:0005488);; Biological Process: transcription, DNA-templated (GO:0006351);;	--	Transcription	SRF-type transcription factor (DNA-binding and dimerisation domain);; K-box region	MADS-box transcription factor 8 OS=Oryza sativa subsp. japonica (Rice) PE=1 SV=1	Transcription	AGL9 [Liriodendron tulipifera]
F01_transcript_41436	--	K09264|8.24514e-68|mus:103991012|K09264 MADS-box transcription factor, plant | (RefSeq) truncated transcription factor CAULIFLOWER A	Transcription	SRF-type transcription factor (DNA-binding and dimerisation domain);; K-box region	MADS-box transcription factor 18 GN=OSJNBb0040H10.26 OS=Oryza sativa subsp. japonica (Rice) PE=1 SV=1	Transcription	MADS-box protein 1 [Dendrobium nobile]
F01_transcript_41481	Molecular Function: DNA binding (GO:0003677);; Molecular Function: transcription factor activity, sequence-specific DNA binding (GO:0003700);; Cellular Component: nucleus (GO:0005634);; Biological Process: regulation of transcription, DNA-templated (GO:0006355);; Molecular Function: protein dimerization activity (GO:0046983);;	K09264|2.73792e-65|mus:103998548|K09264 MADS-box transcription factor, plant | (RefSeq) MADS-box transcription factor 16-like	Transcription	SRF-type transcription factor (DNA-binding and dimerisation domain);; K-box region	MADS-box transcription factor 16 OS=Oryza sativa subsp. japonica (Rice) PE=1 SV=2	Transcription	MADS box transcription factor AP3 [Sagittaria montevidensis]
F01_transcript_41551	Molecular Function: translation repressor activity, nucleic acid binding (GO:0000900);; Molecular Function: DNA binding (GO:0003677);; Molecular Function: transcription factor activity, sequence-specific DNA binding (GO:0003700);; Cellular Component: nucleus (GO:0005634);; Biological Process: response to temperature stimulus (GO:0009266);; Biological Process: negative regulation of flower develop…	--	Transcription	SRF-type transcription factor (DNA-binding and dimerisation domain);; K-box region	MADS-box protein SVP GN=SVP OS=Arabidopsis thaliana (Mouse-ear cress) PE=1 SV=1	Transcription	PREDICTED: MADS-box protein JOINTLESS-like [Elaeis guineensis]
F01_transcript_41999	Molecular Function: binding (GO:0005488);; Biological Process: transcription, DNA-templated (GO:0006351);;	--	Transcription	SRF-type transcription factor (DNA-binding and dimerisation domain);; K-box region	MADS-box protein SOC1 GN=F17K2.19 OS=Arabidopsis thaliana (Mouse-ear cress) PE=1 SV=1	Transcription	PREDICTED: MADS-box transcription factor 50-like [Phoenix dactylifera]
F01_transcript_42066	Molecular Function: DNA binding (GO:0003677);; Molecular Function: transcription factor activity, sequence-specific DNA binding (GO:0003700);; Cellular Component: nucleus (GO:0005634);; Biological Process: regulation of transcription, DNA-templated (GO:0006355);; Molecular Function: protein dimerization activity (GO:0046983);;	K09264|2.73803e-137|pda:103712799|K09264 MADS-box transcription factor, plant | (RefSeq) MADS-box transcription factor 6	Transcription	K-box region;; SRF-type transcription factor (DNA-binding and dimerisation domain)	MADS-box transcription factor 6 OS=Oryza sativa subsp. japonica (Rice) PE=1 SV=1	Transcription	MADS-box transcription factor [Ananas comosus]
F01_transcript_42092	Molecular Function: DNA binding (GO:0003677);; Molecular Function: transcription factor activity, sequence-specific DNA binding (GO:0003700);; Cellular Component: nucleus (GO:0005634);; Biological Process: regulation of transcription, DNA-templated (GO:0006355);; Molecular Function: protein dimerization activity (GO:0046983);;	--	Transcription	K-box region;; SRF-type transcription factor (DNA-binding and dimerisation domain)	Agamous-like MADS-box protein AGL9 homolog OS=Aranda deborah (Orchid) PE=2 SV=1	Transcription	putative MADS box protein [Zostera japonica]
F01_transcript_42708	Molecular Function: DNA binding (GO:0003677);; Molecular Function: transcription factor activity, sequence-specific DNA binding (GO:0003700);; Cellular Component: nucleus (GO:0005634);; Biological Process: regulation of transcription, DNA-templated (GO:0006355);; Molecular Function: protein dimerization activity (GO:0046983);;	K09264|8.62802e-130|pda:103701620|K09264 MADS-box transcription factor, plant | (RefSeq) MADS-box transcription factor 3-like	Transcription	K-box region;; SRF-type transcription factor (DNA-binding and dimerisation domain)	MADS-box transcription factor 21 OS=Oryza sativa subsp. japonica (Rice) PE=2 SV=1	Transcription	MADS-box transcription factor [Asparagus virgatus]
F01_transcript_42875	Molecular Function: DNA binding (GO:0003677);; Molecular Function: transcription factor activity, sequence-specific DNA binding (GO:0003700);; Cellular Component: nucleus (GO:0005634);; Biological Process: regulation of transcription, DNA-templated (GO:0006355);; Molecular Function: protein dimerization activity (GO:0046983);;	K09264|1.83713e-70|mus:103998548|K09264 MADS-box transcription factor, plant | (RefSeq) MADS-box transcription factor 16-like	Transcription	SRF-type transcription factor (DNA-binding and dimerisation domain);; K-box region	MADS-box transcription factor 16 OS=Oryza sativa subsp. japonica (Rice) PE=1 SV=2	Transcription	MADS box transcription factor AP3 [Sagittaria montevidensis]
F01_transcript_43226	Molecular Function: binding (GO:0005488);; Biological Process: transcription, DNA-templated (GO:0006351);; Biological Process: regulation of gene expression (GO:0010468);; Biological Process: negative regulation of biological process (GO:0048519);; Biological Process: regulation of nitrogen compound metabolic process (GO:0051171);; Biological Process: regulation of primary metabolic process (GO:0…	--	Transcription	SRF-type transcription factor (DNA-binding and dimerisation domain);; K-box region	MADS-box protein JOINTLESS GN=J OS=Solanum lycopersicum (Tomato) PE=1 SV=1	Transcription	PREDICTED: MADS-box protein SVP-like [Elaeis guineensis]
F01_transcript_43568	Molecular Function: transcription factor activity, sequence-specific DNA binding (GO:0003700);; Molecular Function: binding (GO:0005488);; Cellular Component: nucleus (GO:0005634);; Biological Process: regulation of transcription, DNA-templated (GO:0006355);; Cellular Component: membrane (GO:0016020);;	--	Transcription	SRF-type transcription factor (DNA-binding and dimerisation domain);; K-box region	MADS-box transcription factor 32 GN=P0042A10.22 OS=Oryza sativa subsp. japonica (Rice) PE=2 SV=1	Transcription	MIKC-type MADS-box transcription factor WM16 [Hordeum vulgare]
F01_transcript_43575	Molecular Function: binding (GO:0005488);; Biological Process: transcription, DNA-templated (GO:0006351);; Biological Process: regulation of gene expression (GO:0010468);; Biological Process: negative regulation of biological process (GO:0048519);; Biological Process: regulation of nitrogen compound metabolic process (GO:0051171);; Biological Process: regulation of primary metabolic process (GO:0…	--	Transcription	SRF-type transcription factor (DNA-binding and dimerisation domain);; K-box region	MADS-box protein JOINTLESS GN=J OS=Solanum lycopersicum (Tomato) PE=1 SV=1	Transcription	PREDICTED: MADS-box protein SVP-like [Elaeis guineensis]
F01_transcript_43587	Molecular Function: DNA binding (GO:0003677);; Molecular Function: transcription factor activity, sequence-specific DNA binding (GO:0003700);; Cellular Component: nucleus (GO:0005634);; Biological Process: regulation of transcription, DNA-templated (GO:0006355);; Molecular Function: zinc ion binding (GO:0008270);; Molecular Function: protein dimerization activity (GO:0046983);;	K09264|1.32969e-27|mus:103986540|K09264 MADS-box transcription factor, plant | (RefSeq) truncated transcription factor CAULIFLOWER A-like	Transcription	SRF-type transcription factor (DNA-binding and dimerisation domain)	MADS-box transcription factor 15 OS=Oryza sativa subsp. japonica (Rice) PE=1 SV=2	Transcription	TPA: putative MADS-box transcription factor family protein [Zea mays]
F01_transcript_44249	Molecular Function: DNA binding (GO:0003677);; Molecular Function: transcription factor activity, sequence-specific DNA binding (GO:0003700);; Cellular Component: nucleus (GO:0005634);; Biological Process: regulation of transcription, DNA-templated (GO:0006355);; Molecular Function: protein dimerization activity (GO:0046983);;	--	Transcription	SRF-type transcription factor (DNA-binding and dimerisation domain)	MADS-box transcription factor 15 OS=Oryza sativa subsp. japonica (Rice) PE=1 SV=2	Transcription	PREDICTED: agamous-like MADS-box protein AGL8-like [Cucumis sativus]
F01_transcript_44776	Molecular Function: DNA binding (GO:0003677);; Molecular Function: transcription factor activity, sequence-specific DNA binding (GO:0003700);; Cellular Component: nucleus (GO:0005634);; Biological Process: regulation of transcription, DNA-templated (GO:0006355);; Molecular Function: protein dimerization activity (GO:0046983);;	K09264|1.05528e-53|mus:103991012|K09264 MADS-box transcription factor, plant | (RefSeq) truncated transcription factor CAULIFLOWER A	Transcription	SRF-type transcription factor (DNA-binding and dimerisation domain);; K-box region	Agamous-like MADS-box protein AGL8 homolog GN=SCM1 OS=Solanum commersonii (Commerson&apos;s wild potato) PE=2 SV=1	Transcription	MADS-box transcription factor [Houttuynia cordata]
F01_transcript_44934	Molecular Function: DNA binding (GO:0003677);; Molecular Function: transcription factor activity, sequence-specific DNA binding (GO:0003700);; Cellular Component: nucleus (GO:0005634);; Biological Process: regulation of transcription, DNA-templated (GO:0006355);; Molecular Function: protein dimerization activity (GO:0046983);;	K09264|1.41468e-102|pda:103722306|K09264 MADS-box transcription factor, plant | (RefSeq) agamous-like MADS-box protein AGL9 homolog	Transcription	K-box region;; SRF-type transcription factor (DNA-binding and dimerisation domain)	MADS-box protein CMB1 GN=CMB1 OS=Dianthus caryophyllus (Carnation) PE=2 SV=1	Transcription	PREDICTED: developmental protein SEPALLATA 1 [Nelumbo nucifera]
F01_transcript_46338	Molecular Function: DNA binding (GO:0003677);; Molecular Function: transcription factor activity, sequence-specific DNA binding (GO:0003700);; Cellular Component: nucleus (GO:0005634);; Biological Process: regulation of transcription, DNA-templated (GO:0006355);; Molecular Function: protein dimerization activity (GO:0046983);;	K09264|3.98852e-103|pda:103722306|K09264 MADS-box transcription factor, plant | (RefSeq) agamous-like MADS-box protein AGL9 homolog	Transcription	K-box region;; SRF-type transcription factor (DNA-binding and dimerisation domain)	MADS-box protein CMB1 GN=CMB1 OS=Dianthus caryophyllus (Carnation) PE=2 SV=1	Transcription	PREDICTED: developmental protein SEPALLATA 1 [Nelumbo nucifera]
F01_transcript_46502	Molecular Function: DNA binding (GO:0003677);; Molecular Function: transcription factor activity, sequence-specific DNA binding (GO:0003700);; Cellular Component: nucleus (GO:0005634);; Biological Process: regulation of transcription, DNA-templated (GO:0006355);; Molecular Function: protein dimerization activity (GO:0046983);;	--	Transcription	SRF-type transcription factor (DNA-binding and dimerisation domain);; K-box region	MADS-box transcription factor 6 OS=Oryza sativa subsp. japonica (Rice) PE=1 SV=1	Transcription	MADS36 [Gossypium hirsutum]
F01_transcript_48048	Molecular Function: DNA binding (GO:0003677);; Molecular Function: transcription factor activity, sequence-specific DNA binding (GO:0003700);; Cellular Component: nucleus (GO:0005634);; Biological Process: regulation of transcription, DNA-templated (GO:0006355);; Molecular Function: protein dimerization activity (GO:0046983);;	K09264|5.59359e-95|pda:103702602|K09264 MADS-box transcription factor, plant | (RefSeq) MADS-box transcription factor 2-like	Transcription	SRF-type transcription factor (DNA-binding and dimerisation domain);; K-box region	MADS-box transcription factor 2 OS=Oryza sativa subsp. japonica (Rice) PE=2 SV=1	Transcription	MADS box containing protein PI [Sagittaria montevidensis]
F01_transcript_51368	Molecular Function: DNA binding (GO:0003677);; Molecular Function: transcription factor activity, sequence-specific DNA binding (GO:0003700);; Cellular Component: nucleus (GO:0005634);; Biological Process: regulation of transcription, DNA-templated (GO:0006355);; Molecular Function: protein dimerization activity (GO:0046983);;	--	Transcription	SRF-type transcription factor (DNA-binding and dimerisation domain)	MADS-box transcription factor 15 OS=Oryza sativa subsp. japonica (Rice) PE=1 SV=2	Transcription	putative MADS-box transcription factor family protein [Zea mays]
F01_transcript_54667	--	--	Transcription	K-box region;; SRF-type transcription factor (DNA-binding and dimerisation domain)	MADS-box transcription factor 8 OS=Oryza sativa subsp. japonica (Rice) PE=1 SV=1	Transcription	transcription factor SEP3 [Chloranthus spicatus]
F01_transcript_55484	Molecular Function: DNA binding (GO:0003677);; Molecular Function: transcription factor activity, sequence-specific DNA binding (GO:0003700);; Cellular Component: nucleus (GO:0005634);; Biological Process: regulation of transcription, DNA-templated (GO:0006355);; Molecular Function: protein dimerization activity (GO:0046983);;	K09264|1.30544e-131|pda:103712799|K09264 MADS-box transcription factor, plant | (RefSeq) MADS-box transcription factor 6	Transcription	K-box region;; SRF-type transcription factor (DNA-binding and dimerisation domain)	MADS-box transcription factor 6 OS=Oryza sativa subsp. japonica (Rice) PE=1 SV=1	Transcription	MADS-box transcription factor [Ananas comosus]
F01_transcript_60293	Molecular Function: DNA binding (GO:0003677);; Molecular Function: transcription factor activity, sequence-specific DNA binding (GO:0003700);; Cellular Component: nucleus (GO:0005634);; Biological Process: regulation of transcription, DNA-templated (GO:0006355);; Molecular Function: protein dimerization activity (GO:0046983);;	K09264|4.89885e-66|mus:103998548|K09264 MADS-box transcription factor, plant | (RefSeq) MADS-box transcription factor 16-like	Transcription	SRF-type transcription factor (DNA-binding and dimerisation domain);; K-box region	MADS-box transcription factor 16 OS=Oryza sativa subsp. japonica (Rice) PE=1 SV=2	Transcription	MADS box transcription factor AP3 [Sagittaria montevidensis]
F01_transcript_61476	Molecular Function: DNA binding (GO:0003677);; Molecular Function: transcription factor activity, sequence-specific DNA binding (GO:0003700);; Cellular Component: nucleus (GO:0005634);; Biological Process: regulation of transcription, DNA-templated (GO:0006355);; Biological Process: vegetative to reproductive phase transition of meristem (GO:0010228);; Molecular Function: protein dimerization act…	--	Transcription	--	MADS-box transcription factor 26 GN=P0498H04.24 OS=Oryza sativa subsp. japonica (Rice) PE=2 SV=1	Transcription	MADS-box transcription factor 26 [Triticum urartu]
F01_transcript_64286	Molecular Function: DNA binding (GO:0003677);; Molecular Function: transcription factor activity, sequence-specific DNA binding (GO:0003700);; Cellular Component: nucleus (GO:0005634);; Biological Process: regulation of transcription, DNA-templated (GO:0006355);; Biological Process: maintenance of inflorescence meristem identity (GO:0010077);; Biological Process: fruit development (GO:0010154);; …	--	Transcription	SRF-type transcription factor (DNA-binding and dimerisation domain)	Agamous-like MADS-box protein AGL8 homolog GN=AGL8 OS=Sinapis alba (White mustard) PE=2 SV=1	Transcription	PREDICTED: agamous-like MADS-box protein AGL8-like [Cucumis sativus]
F01_transcript_66712	Molecular Function: DNA binding (GO:0003677);; Molecular Function: transcription factor activity, sequence-specific DNA binding (GO:0003700);; Cellular Component: nucleus (GO:0005634);; Biological Process: regulation of transcription, DNA-templated (GO:0006355);; Molecular Function: protein dimerization activity (GO:0046983);;	K09264|2.96485e-68|mus:103998548|K09264 MADS-box transcription factor, plant | (RefSeq) MADS-box transcription factor 16-like	Transcription	SRF-type transcription factor (DNA-binding and dimerisation domain);; K-box region	MADS-box transcription factor 16 OS=Oryza sativa subsp. japonica (Rice) PE=1 SV=2	Transcription	MADS box transcription factor AP3 [Sagittaria montevidensis]
F01_transcript_67049	Molecular Function: translation repressor activity, nucleic acid binding (GO:0000900);; Molecular Function: DNA binding (GO:0003677);; Molecular Function: transcription factor activity, sequence-specific DNA binding (GO:0003700);; Cellular Component: nucleus (GO:0005634);; Biological Process: response to temperature stimulus (GO:0009266);; Biological Process: negative regulation of flower develop…	K09260|9.03388e-43|vvi:100251508|K09260 MADS-box transcription enhancer factor 2A | (RefSeq) MADS-box protein SVP	Transcription	K-box region	MADS-box protein SVP GN=SVP OS=Arabidopsis thaliana (Mouse-ear cress) PE=1 SV=1	Transcription	MADS box protein 5, partial [Agave tequilana]
F01_transcript_68963	Molecular Function: DNA binding (GO:0003677);; Molecular Function: transcription factor activity, sequence-specific DNA binding (GO:0003700);; Cellular Component: nucleus (GO:0005634);; Biological Process: regulation of transcription, DNA-templated (GO:0006355);; Molecular Function: protein dimerization activity (GO:0046983);;	--	Transcription	K-box region	Agamous-like MADS-box protein AGL9 homolog GN=FBP2 OS=Petunia hybrida (Petunia) PE=1 SV=2	Transcription	putative MADS box protein [Zostera japonica]
F01_transcript_71150	Molecular Function: DNA binding (GO:0003677);; Molecular Function: transcription factor activity, sequence-specific DNA binding (GO:0003700);; Cellular Component: nucleus (GO:0005634);; Biological Process: regulation of transcription, DNA-templated (GO:0006355);; Molecular Function: protein dimerization activity (GO:0046983);;	--	Transcription	SRF-type transcription factor (DNA-binding and dimerisation domain)	MADS-box transcription factor 15 OS=Oryza sativa subsp. japonica (Rice) PE=1 SV=2	Transcription	putative MADS-box transcription factor family protein [Zea mays]
F01_transcript_71226	Molecular Function: DNA binding (GO:0003677);; Molecular Function: transcription factor activity, sequence-specific DNA binding (GO:0003700);; Cellular Component: nucleus (GO:0005634);; Biological Process: regulation of transcription, DNA-templated (GO:0006355);; Molecular Function: protein dimerization activity (GO:0046983);;	K09264|2.17867e-130|pda:103701620|K09264 MADS-box transcription factor, plant | (RefSeq) MADS-box transcription factor 3-like	Transcription	K-box region;; SRF-type transcription factor (DNA-binding and dimerisation domain)	MADS-box transcription factor 21 OS=Oryza sativa subsp. japonica (Rice) PE=2 SV=1	Transcription	MADS-box transcription factor [Asparagus virgatus]
F01_transcript_71582	Molecular Function: DNA binding (GO:0003677);; Molecular Function: transcription factor activity, sequence-specific DNA binding (GO:0003700);; Cellular Component: nucleus (GO:0005634);; Biological Process: regulation of transcription, DNA-templated (GO:0006355);; Molecular Function: identical protein binding (GO:0042802);; Molecular Function: protein dimerization activity (GO:0046983);;	--	Transcription	SRF-type transcription factor (DNA-binding and dimerisation domain);; K-box region	MADS-box transcription factor 8 OS=Oryza sativa subsp. japonica (Rice) PE=1 SV=1	Transcription	PREDICTED: MADS-box transcription factor 8-like [Oryza brachyantha]
F01_transcript_72121	Molecular Function: DNA binding (GO:0003677);; Cellular Component: nucleus (GO:0005634);; Biological Process: regulation of transcription, DNA-templated (GO:0006355);; Molecular Function: protein dimerization activity (GO:0046983);;	--	Transcription	SRF-type transcription factor (DNA-binding and dimerisation domain)	MADS-box transcription factor 6 OS=Oryza sativa subsp. japonica (Rice) PE=1 SV=1	Transcription	PREDICTED: MADS-box transcription factor 6-like [Cucumis sativus]
F01_transcript_72547	Molecular Function: DNA binding (GO:0003677);; Molecular Function: transcription factor activity, sequence-specific DNA binding (GO:0003700);; Cellular Component: nucleus (GO:0005634);; Biological Process: regulation of transcription, DNA-templated (GO:0006355);; Biological Process: single-multicellular organism process (GO:0044707);; Biological Process: single-organism developmental process (GO:…	K09264|1.12587e-66|mus:103991012|K09264 MADS-box transcription factor, plant | (RefSeq) truncated transcription factor CAULIFLOWER A	Transcription	SRF-type transcription factor (DNA-binding and dimerisation domain);; K-box region	MADS-box transcription factor 18 GN=OSJNBb0040H10.26 OS=Oryza sativa subsp. japonica (Rice) PE=1 SV=1	Transcription	PREDICTED: truncated transcription factor CAULIFLOWER A-like [Musa acuminata subsp. malaccensis]
F01_transcript_73430	Molecular Function: DNA binding (GO:0003677);; Molecular Function: transcription factor activity, sequence-specific DNA binding (GO:0003700);; Cellular Component: nucleus (GO:0005634);; Biological Process: regulation of transcription, DNA-templated (GO:0006355);; Molecular Function: protein dimerization activity (GO:0046983);;	K09264|2.65997e-27|mus:103986540|K09264 MADS-box transcription factor, plant | (RefSeq) truncated transcription factor CAULIFLOWER A-like	Transcription	SRF-type transcription factor (DNA-binding and dimerisation domain)	MADS-box transcription factor 15 OS=Oryza sativa subsp. japonica (Rice) PE=1 SV=2	Transcription	TPA: putative MADS-box transcription factor family protein [Zea mays]
F01_transcript_76562	Molecular Function: binding (GO:0005488);; Biological Process: transcription, DNA-templated (GO:0006351);;	--	Transcription	SRF-type transcription factor (DNA-binding and dimerisation domain);; K-box region	MADS-box transcription factor 8 OS=Oryza sativa subsp. japonica (Rice) PE=1 SV=1	Transcription	AGL9 [Liriodendron tulipifera]
F01_transcript_77882	--	--	Transcription	K-box region	Agamous-like MADS-box protein AGL9 homolog OS=Aranda deborah (Orchid) PE=2 SV=1	Transcription	PREDICTED: agamous-like MADS-box protein AGL9 homolog isoform X5 [Phoenix dactylifera]
F01_transcript_80472	Molecular Function: DNA binding (GO:0003677);; Molecular Function: transcription factor activity, sequence-specific DNA binding (GO:0003700);; Cellular Component: nucleus (GO:0005634);; Biological Process: regulation of transcription, DNA-templated (GO:0006355);; Molecular Function: protein dimerization activity (GO:0046983);;	K09264|7.57936e-52|pda:103712799|K09264 MADS-box transcription factor, plant | (RefSeq) MADS-box transcription factor 6	Transcription	--	MADS-box transcription factor 6 OS=Oryza sativa subsp. japonica (Rice) PE=1 SV=1	Transcription	MADS box protein [Asparagus officinalis]
F01_transcript_80589	Molecular Function: DNA binding (GO:0003677);; Molecular Function: transcription factor activity, sequence-specific DNA binding (GO:0003700);; Cellular Component: nucleus (GO:0005634);; Biological Process: regulation of transcription, DNA-templated (GO:0006355);; Molecular Function: protein dimerization activity (GO:0046983);;	--	Transcription	SRF-type transcription factor (DNA-binding and dimerisation domain)	MADS-box transcription factor 3 OS=Oryza sativa subsp. japonica (Rice) PE=2 SV=1	Transcription	Agamous-like MADS-box protein AGL11 [Glycine soja]
F01_transcript_81751	Molecular Function: DNA binding (GO:0003677);; Molecular Function: transcription factor activity, sequence-specific DNA binding (GO:0003700);; Cellular Component: nucleus (GO:0005634);; Biological Process: regulation of transcription, DNA-templated (GO:0006355);; Molecular Function: protein dimerization activity (GO:0046983);; Biological Process: indeterminate inflorescence morphogenesis (GO:0048…	K09264|4.01231e-76|pda:103701620|K09264 MADS-box transcription factor, plant | (RefSeq) MADS-box transcription factor 3-like	Transcription	SRF-type transcription factor (DNA-binding and dimerisation domain);; K-box region	MADS-box transcription factor 21 OS=Oryza sativa subsp. japonica (Rice) PE=2 SV=1	Transcription	MADS-box transcription factor [Asparagus virgatus]
F01_transcript_82728	Molecular Function: DNA binding (GO:0003677);; Molecular Function: transcription factor activity, sequence-specific DNA binding (GO:0003700);; Cellular Component: nucleus (GO:0005634);; Biological Process: regulation of transcription, DNA-templated (GO:0006355);; Molecular Function: protein dimerization activity (GO:0046983);;	K09264|2.04214e-91|pda:103702602|K09264 MADS-box transcription factor, plant | (RefSeq) MADS-box transcription factor 2-like	Transcription	K-box region;; SRF-type transcription factor (DNA-binding and dimerisation domain)	MADS-box transcription factor 2 OS=Oryza sativa subsp. japonica (Rice) PE=2 SV=1	Transcription	MADS box containing protein PI [Sagittaria montevidensis]
F01_transcript_83058	Molecular Function: binding (GO:0005488);; Biological Process: transcription, DNA-templated (GO:0006351);;	K09264|1.58055e-47|pda:103710313|K09264 MADS-box transcription factor, plant | (RefSeq) MADS-box transcription factor 14-like	Transcription	K-box region;; SRF-type transcription factor (DNA-binding and dimerisation domain)	Agamous-like MADS-box protein AGL8 GN=AGL8 OS=Arabidopsis thaliana (Mouse-ear cress) PE=1 SV=1	Transcription	AP1-like protein [Eupomatia bennettii]
F01_transcript_83634	Molecular Function: binding (GO:0005488);; Biological Process: transcription, DNA-templated (GO:0006351);;	K09264|1.63377e-41|pda:103702755|K09264 MADS-box transcription factor, plant | (RefSeq) MADS-box transcription factor 6-like	Transcription	K-box region	MADS-box transcription factor 6 OS=Oryza sativa subsp. japonica (Rice) PE=1 SV=1	Transcription	putative MADS-domain transcription factor MpMADS4 [Magnolia praecocissima]
F01_transcript_84758	Molecular Function: DNA binding (GO:0003677);; Molecular Function: transcription factor activity, sequence-specific DNA binding (GO:0003700);; Cellular Component: nucleus (GO:0005634);; Biological Process: regulation of transcription, DNA-templated (GO:0006355);; Biological Process: specification of floral organ identity (GO:0010093);; Molecular Function: protein dimerization activity (GO:0046983…	K09264|3.40087e-31|obr:102718281|K09264 MADS-box transcription factor, plant | (RefSeq) AP3; MADS-box transcription factor 16	Transcription	SRF-type transcription factor (DNA-binding and dimerisation domain)	MADS-box transcription factor 16 OS=Oryza sativa subsp. japonica (Rice) PE=1 SV=2	Transcription	MADS box transcription factor AP3 [Sagittaria montevidensis]
F01_transcript_85631	Biological Process: protein import into nucleus, translocation (GO:0000060);; Molecular Function: DNA binding (GO:0003677);; Molecular Function: transcription factor activity, sequence-specific DNA binding (GO:0003700);; Cellular Component: nucleus (GO:0005634);; Cellular Component: cytoplasm (GO:0005737);; Biological Process: regulation of transcription, DNA-templated (GO:0006355);; Molecular Fu…	--	Transcription	SRF-type transcription factor (DNA-binding and dimerisation domain)	MADS-box protein SOC1 GN=F17K2.19 OS=Arabidopsis thaliana (Mouse-ear cress) PE=1 SV=1	Transcription	PREDICTED: MADS-box transcription factor 50-like [Phoenix dactylifera]
F01_transcript_87668	Molecular Function: DNA binding (GO:0003677);; Molecular Function: transcription factor activity, sequence-specific DNA binding (GO:0003700);; Cellular Component: nucleus (GO:0005634);; Biological Process: regulation of transcription, DNA-templated (GO:0006355);; Molecular Function: protein dimerization activity (GO:0046983);;	K09264|3.8928e-22|pop:POPTR_0002s07920g|K09264 MADS-box transcription factor, plant | (RefSeq) POPTRDRAFT_709904; MADS-box family protein	Transcription	SRF-type transcription factor (DNA-binding and dimerisation domain);; K-box region	Floral homeotic protein PMADS 2 GN=PMADS2 OS=Petunia hybrida (Petunia) PE=2 SV=1	Transcription	MADS box transcription factor AP3 [Sagittaria montevidensis]
F01_transcript_93742	--	K09264|1.20538e-59|mus:103975613|K09264 MADS-box transcription factor, plant | (RefSeq) truncated transcription factor CAULIFLOWER A-like	Transcription	SRF-type transcription factor (DNA-binding and dimerisation domain);; K-box region	MADS-box transcription factor 18 GN=OSJNBb0040H10.26 OS=Oryza sativa subsp. japonica (Rice) PE=1 SV=1	Transcription	MADS box protein [Lilium longiflorum]
F01_transcript_36117	Molecular Function: binding (GO:0005488);; Biological Process: transcription, DNA-templated (GO:0006351);;	K09264	Transcription	SRF-type transcription factor (DNA-binding and dimerisation domain);; K-box region	MADS-box transcription factor 50 OS=Oryza sativa subsp. japonica (Rice) PE=2 SV=1	Transcription	PREDICTED: MADS-box transcription factor 50-like [Phoenix dactylifera]

## Sheet: AP2
gi|30089754|gb|AAP20858.1|
Line 1577: F01_transcript_141886	PREDICTED: AP2-associated protein kinase 1-like [Oryza brachyantha]
Line 2215: F01_transcript_14296	PREDICTED: AP2-like ethylene-responsive transcription factor ANT [Elaeis guineensis]
Line 3654: F01_transcript_146114	PREDICTED: AP2-like ethylene-responsive transcription factor TOE3 isoform X1 [Elaeis guineensis]
Line 8200: F01_transcript_154854	PREDICTED: AP2-like ethylene-responsive transcription factor ANT [Elaeis guineensis]
Line 9047: F01_transcript_16071	PREDICTED: AP2-like ethylene-responsive transcription factor TOE3 isoform X1 [Elaeis guineensis]
Line 9270: F01_transcript_16781	PREDICTED: AP2-like ethylene-responsive transcription factor TOE3 isoform X1 [Elaeis guineensis]
Line 23974: F01_transcript_56829	PREDICTED: AP2-like ethylene-responsive transcription factor TOE3 isoform X3 [Nelumbo nucifera]
Line 24213: F01_transcript_57332	PREDICTED: AP2-like ethylene-responsive transcription factor TOE3 isoform X2 [Phoenix dactylifera]
Line 25535: F01_transcript_59816	PREDICTED: AP2-like ethylene-responsive transcription factor TOE3 isoform X2 [Phoenix dactylifera]
Line 28524: F01_transcript_65359	AP2 domain transctiption factor [Potamogeton distinctus]
Line 28913: F01_transcript_66254	PREDICTED: AP2-like ethylene-responsive transcription factor TOE3 isoform X2 [Elaeis guineensis]
Line 32629: F01_transcript_73853	PREDICTED: AP2-like ethylene-responsive transcription factor TOE3 isoform X1 [Phoenix dactylifera]
Line 33347: F01_transcript_75467	PREDICTED: AP2-like ethylene-responsive transcription factor At1g16060 [Nelumbo nucifera]
Line 40728: F01_transcript_89491	PREDICTED: AP2-like ethylene-responsive transcription factor At2g41710 isoform X1 [Phoenix dactylifera]
Line 3654: F01_transcript_146114	PREDICTED: AP2-like ethylene-responsive transcription factor TOE3 isoform X1 [Elaeis guineensis]
Line 15942: F01_transcript_35713	PREDICTED: AP2 domain-containing transcription repressor AP2-like [Musa acuminata subsp. malaccensis]
Line 49457: F01_transcript_101288	PREDICTED: AP2-like ethylene-responsive transcription factor At2g41710 isoform X1 [Sesamum indicum]
Line 51841: F01_transcript_123722	PREDICTED: AP2-like ethylene-responsive transcription factor TOE3 isoform X1 [Phoenix dactylifera]
Line 54343: F01_transcript_128816	PREDICTED: AP2-like ethylene-responsive transcription factor AIL1 [Elaeis guineensis]
Line 54518: F01_transcript_12921	PREDICTED: AP2-like ethylene-responsive transcription factor ANT [Elaeis guineensis]
Line 57634: F01_transcript_134953	PREDICTED: AP2-like ethylene-responsive transcription factor TOE3 isoform X1 [Phoenix dactylifera]
Line 57730: F01_transcript_135193	PREDICTED: AP2-like ethylene-responsive transcription factor TOE3 isoform X1 [Phoenix dactylifera]
Line 57799: F01_transcript_135344	PREDICTED: AP2-like ethylene-responsive transcription factor TOE3 isoform X2 [Phoenix dactylifera]
Line 57825: F01_transcript_125457	AP2 domain transctiption factor [Potamogeton distinctus]

## Sheet: TF
#ID	Family
F01_transcript_100885	MADS-MIKC
F01_transcript_101566	MADS-M-type
F01_transcript_106489	MADS-MIKC
F01_transcript_107035	MADS-MIKC
F01_transcript_108017	MADS-MIKC
F01_transcript_110308	MADS-MIKC
F01_transcript_112286	MADS-M-type
F01_transcript_114233	MADS-M-type
F01_transcript_114559	MADS-MIKC
F01_transcript_115173	MADS-M-type
F01_transcript_116688	MADS-MIKC
F01_transcript_119041	MADS-MIKC
F01_transcript_122347	MADS-MIKC
F01_transcript_125669	MADS-M-type
F01_transcript_128032	MADS-MIKC
F01_transcript_128189	MADS-MIKC
F01_transcript_129935	MADS-MIKC
F01_transcript_130399	MADS-MIKC
F01_transcript_130615	MADS-MIKC
F01_transcript_131095	MADS-MIKC
F01_transcript_132224	MADS-MIKC
F01_transcript_134898	MADS-MIKC
F01_transcript_136760	MADS-M-type
F01_transcript_137658	MADS-MIKC
F01_transcript_143082	MADS-M-type
F01_transcript_145042	MADS-MIKC
F01_transcript_148272	MADS-MIKC
F01_transcript_150451	MADS-MIKC
F01_transcript_153231	MADS-MIKC
F01_transcript_155792	MADS-MIKC
F01_transcript_156288	MADS-MIKC
F01_transcript_35367	MADS-MIKC
F01_transcript_36117	MADS-MIKC
F01_transcript_377	MADS-M-type
F01_transcript_38978	MADS-MIKC
F01_transcript_39706	MADS-MIKC
F01_transcript_39799	MADS-MIKC
F01_transcript_40734	MADS-MIKC
F01_transcript_41126	MADS-MIKC
F01_transcript_41436	MADS-MIKC
F01_transcript_41481	MADS-MIKC
F01_transcript_41551	MADS-MIKC
F01_transcript_41999	MADS-MIKC
F01_transcript_42066	MADS-MIKC
F01_transcript_42092	MADS-MIKC
F01_transcript_42708	MADS-MIKC
F01_transcript_42875	MADS-MIKC
F01_transcript_43226	MADS-MIKC
F01_transcript_43568	MADS-MIKC
F01_transcript_43575	MADS-MIKC
F01_transcript_43587	MADS-M-type
F01_transcript_44249	MADS-M-type
F01_transcript_44776	MADS-MIKC
F01_transcript_44934	MADS-MIKC
F01_transcript_46338	MADS-MIKC
F01_transcript_46502	MADS-MIKC
F01_transcript_48048	MADS-MIKC
F01_transcript_51368	MADS-M-type
F01_transcript_55484	MADS-MIKC
F01_transcript_60293	MADS-MIKC
F01_transcript_64286	MADS-M-type
F01_transcript_66712	MADS-MIKC
F01_transcript_69353	MADS-M-type
F01_transcript_71150	MADS-M-type
F01_transcript_71226	MADS-MIKC
F01_transcript_71582	MADS-M-type
F01_transcript_72121	MADS-M-type
F01_transcript_72547	MADS-MIKC
F01_transcript_73430	MADS-M-type
F01_transcript_76562	MADS-MIKC
F01_transcript_80589	MADS-M-type
F01_transcript_81751	MADS-MIKC
F01_transcript_83058	MADS-MIKC
F01_transcript_84758	MADS-M-type
F01_transcript_85631	MADS-M-type
F01_transcript_93683	MADS-MIKC
F01_transcript_93742	MADS-MIKC

## Sheet: up and down DEG
#DEG_Set	All_DEG	up-regulated	down-regulated
DC1-1_DC1-2_DC1-3_vs_ SC2-1_SC2-2_SC2-3	15996	7468	8528
DC1-1_DC1-2_DC1-3_vs_SC1-1_SC1-2	10197	4889	5308
DC1-1_DC1-2_DC1-3_vs_SX1-1_SX1-2	9439	3944	5495
DC3-1_DC3-2_DC3-3_vs_SC2-1-SC2-2-SC2-3	4751	1938	2813
DC2-1_DC2-2_DC2-3_vs_ DC3-1_DC3-2_DC3-3	12233	6722	5511
DC3-1_DC3-2_DC3-3_vs_ DC1-1_DC1-2_DC1-3	16450	8809	7641
DC3-1_DC3-2_DC3-3_vs_ SC2-1_SC2-2_SC2-3	12865	8196	4669
DC3-1_DC3-2_DC3-3_vs_SC1-1_SC1-2	15953	8345	7608
DC3-1_DC3-2_DC3-3_vs_SC3-1_SC3-2_SC3-3	14119	6368	7751
DC2-1_DC2-2_DC2-3_vs_SC1-1_SC1-2	7585	3702	3883
DX2-1_DX2-2_DX2-3_vs_SX1-1_SX1-2	6760	2360	4400
DC1-1_DC1-2_DC1-3_vs_ SC3-1_SC3-2_SC3-3	17829	8199	9630
DX3-1_DX3-2_DX3-3_vs_SX3-1_SX3-2_SX3-3	13525	5901	7624
DX3-1_DX3-2_DX3-3_vs_ SX2-1_SX2-2_SX2-3	8794	4973	3821
DX3-1_DX3-2_DX3-3_vs_DX1-1_DX1-2_DX1-3	6285	3236	3049
DX2-1_DX2-2_DX2-3_vs_SX3-1_SX3-2_SX3-3	6717	2818	3899
DX2-1_DX2-2_DX2-3_vs_ DX1-1_DX1-2_DX1-3	8783	4892	3891
DX1-1_DX1-2_DX1-3_vs_ SX3-1_SX3-2_SX3-3	13687	6249	7438
DX1-1_DX1-2_DX1-3_vs_SC1-1_SC1-2	8995	4674	4321
DX1-1_DX1-2_DX1-3_vs_SX1-1_SX1-2	9195	3772	5423
