# Supplementary material for: SMRT and Illumina RNA-Seq Identifies Potential Candidate Genes Related to the Double Flower Phenotype and Unveils SsAP2 as a Key Regulator of the Double-Flower Trait in Sagittaria sagittifolia
Source: Int J Mol Sci. 2022 Feb 17;23(4):2240. doi: 10.3390/ijms23042240 (PMC8875719; doi:10.3390/ijms23042240)
Supplement: Supplementary file 1 [file ijms-23-02240-s001.zip › Supplementary Table 7-TF family.xlsx]

## Sheet: Sheet2
#ID	Family
F01_transcript_100885	MADS-MIKC
F01_transcript_101566	MADS-M-type
F01_transcript_106489	MADS-MIKC
F01_transcript_107035	MADS-MIKC
F01_transcript_108017	MADS-MIKC
F01_transcript_110308	MADS-MIKC
F01_transcript_112286	MADS-M-type
F01_transcript_114233	MADS-M-type
F01_transcript_114559	MADS-MIKC
F01_transcript_115173	MADS-M-type
F01_transcript_116688	MADS-MIKC
F01_transcript_119041	MADS-MIKC
F01_transcript_122347	MADS-MIKC
F01_transcript_125669	MADS-M-type
F01_transcript_128032	MADS-MIKC
F01_transcript_128189	MADS-MIKC
F01_transcript_129935	MADS-MIKC
F01_transcript_130399	MADS-MIKC
F01_transcript_130615	MADS-MIKC
F01_transcript_131095	MADS-MIKC
F01_transcript_132224	MADS-MIKC
F01_transcript_134898	MADS-MIKC
F01_transcript_136760	MADS-M-type
F01_transcript_137658	MADS-MIKC
F01_transcript_143082	MADS-M-type
F01_transcript_145042	MADS-MIKC
F01_transcript_148272	MADS-MIKC
F01_transcript_150451	MADS-MIKC
F01_transcript_153231	MADS-MIKC
F01_transcript_155792	MADS-MIKC
F01_transcript_156288	MADS-MIKC
F01_transcript_35367	MADS-MIKC
F01_transcript_36117	MADS-MIKC
F01_transcript_377	MADS-M-type
F01_transcript_38978	MADS-MIKC
F01_transcript_39706	MADS-MIKC
F01_transcript_39799	MADS-MIKC
F01_transcript_40734	MADS-MIKC
F01_transcript_41126	MADS-MIKC
F01_transcript_41436	MADS-MIKC
F01_transcript_41481	MADS-MIKC
F01_transcript_41551	MADS-MIKC
F01_transcript_41999	MADS-MIKC
F01_transcript_42066	MADS-MIKC
F01_transcript_42092	MADS-MIKC
F01_transcript_42708	MADS-MIKC
F01_transcript_42875	MADS-MIKC
F01_transcript_43226	MADS-MIKC
F01_transcript_43568	MADS-MIKC
F01_transcript_43575	MADS-MIKC
F01_transcript_43587	MADS-M-type
F01_transcript_44249	MADS-M-type
F01_transcript_44776	MADS-MIKC
F01_transcript_44934	MADS-MIKC
F01_transcript_46338	MADS-MIKC
F01_transcript_46502	MADS-MIKC
F01_transcript_48048	MADS-MIKC
F01_transcript_51368	MADS-M-type
F01_transcript_55484	MADS-MIKC
F01_transcript_60293	MADS-MIKC
F01_transcript_64286	MADS-M-type
F01_transcript_66712	MADS-MIKC
F01_transcript_69353	MADS-M-type
F01_transcript_71150	MADS-M-type
F01_transcript_71226	MADS-MIKC
F01_transcript_71582	MADS-M-type
F01_transcript_72121	MADS-M-type
F01_transcript_72547	MADS-MIKC
F01_transcript_73430	MADS-M-type
F01_transcript_76562	MADS-MIKC
F01_transcript_80589	MADS-M-type
F01_transcript_81751	MADS-MIKC
F01_transcript_83058	MADS-MIKC
F01_transcript_84758	MADS-M-type
F01_transcript_85631	MADS-M-type
F01_transcript_93683	MADS-MIKC
F01_transcript_93742	MADS-MIKC
